# Supplementary material for: Long intergenic non-coding RNA 271 is predictive of a poorer prognosis of papillary thyroid cancer
Source: PubMed Central journal article supplement (PMC5105055; doi:10.1038/srep36973), 2016-11-11
Supplement: srep36973-s1.pdf [file srep36973-s1.pdf]

**Title: Long intergenic non-coding RNA 271 is predictive of a poorer prognosis of papillary thyroid cancer**

**Author names:** Ben Ma<sup>1,2</sup>, Tian Liao<sup>1,2</sup>, Duo Wen<sup>1,2</sup>, Chuanpeng Dong<sup>3</sup>, Li Zhou<sup>1,2</sup>, Shuwen Yang<sup>1,2</sup>, Yu Wang<sup>1,2</sup>, Qinghai Ji<sup>1,2</sup>

Table S1 The annotated 2773 lncRNAs from the website of HGNC

| HGNC ID    | Approved Symbol | Chromosome | Accession Numbers  | Entrez Gene ID | Ensembl Gene ID | Pubmed IDs         | RefSeq IDs |
|------------|-----------------|------------|--------------------|----------------|-----------------|--------------------|------------|
| HGNC:37133 | A1BG-AS1        | 19q13.43   | BC040926           | 503538         | ENSG00000268895 |                    | NR_015380  |
| HGNC:27057 | A2M-AS1         | 12p13.31   |                    | 144571         | ENSG00000245105 |                    | NR_026971  |
| HGNC:41022 | A2ML1-AS1       | 12p13.31   |                    |                | ENSG00000256661 |                    |            |
| HGNC:41523 | A2ML1-AS2       | 12p13.31   |                    |                | ENSG00000256904 |                    |            |
| HGNC:50301 | AADACL2-AS1     | 3q25.1     |                    | 101928142      | ENSG00000242908 |                    |            |
| HGNC:51526 | AATBC           | 21q22.3    |                    | 284837         | ENSG00000215458 | 25473900           | NR_026961  |
| HGNC:40053 | AATK-AS1        | 17q25.3    |                    | 388428         | ENSG00000225180 |                    |            |
| HGNC:49667 | ABALON          | 20q11.21   | KC505631           | 103021294      |                 | 24992962           | NR_131907  |
| HGNC:39983 | ABCA9-AS1       | 17q24.2    |                    |                | ENSG00000231749 |                    |            |
| HGNC:40055 | ABCC5-AS1       | 3q27.1     |                    |                | ENSG00000223882 |                    |            |
| HGNC:18289 | ABHD11-AS1      | 7q11.23    | BU595969           | 171022         | ENSG00000225969 | 24984296, 25619660 | NR_026690  |
| HGNC:49685 | ABHD15-AS1      | 17q11.2    | CN275323           |                | ENSG00000264031 | 24504737           |            |
| HGNC:41426 | ACAP2-IT1       | 3q29       |                    |                | ENSG00000229325 |                    |            |
| HGNC:45169 | ACTA2-AS1       | 10q23.31   | AK093340, AX748062 | 100132116      | ENSG00000180139 | 24721325           |            |
| HGNC:20131 | ACTN1-AS1       | 14q24.1    | DB029126, AI147349 | 161159         | ENSG00000259062 |                    |            |
| HGNC:44161 | ACVR2B-AS1      | 3p22.2     | AK025619           | 100128640      | ENSG00000229589 |                    | NR_028389  |
| HGNC:40625 | ADAMTS9-AS1     | 3p14.1     |                    | 101929335      | ENSG00000241158 |                    |            |
| HGNC:42435 | ADAMTS9-AS2     | 3p14.1     |                    | 100507098      | ENSG00000241684 | 24833086           |            |
| HGNC:40797 | ADAMTS19-AS1    | 5q23.3     | DA728271           |                | ENSG00000249421 |                    |            |
| HGNC:32041 | ADAMTSL4-AS1    | 1q21.2     | AK127688           |                | ENSG00000203804 |                    |            |
| HGNC:23299 | ADARB2-AS1      | 10p15.3    |                    | 642394         | ENSG00000205696 |                    | NR_033387  |
| HGNC:48682 | ADD3-AS1        | 10q25.1    |                    | 100505933      |                 |                    |            |
| HGNC:49543 | ADGRA1-AS1      | 10q26.3    |                    |                | ENSG00000256925 |                    |            |
| HGNC:50604 | ADGRL3-AS1      | 4q13.1     |                    | 101927186      | ENSG00000248692 |                    |            |
| HGNC:40648 | ADIPOQ-AS1      | 3q27.3     |                    | 100874095      | ENSG00000226482 |                    | NR_046662  |
| HGNC:45127 | ADIRF-AS1       | 10q23.2    | AK128041           | 100133190      | ENSG00000272734 |                    |            |
| HGNC:51227 | ADNP-AS1        | 20q13.13   |                    | 101927631      | ENSG00000259456 |                    | NR_110009  |
| HGNC:37122 | ADORA2A-AS1     | 22q11.23   | AK091970           | 646023         |                 | 19726446           | NR_028483  |
| HGNC:44144 | ADPGK-AS1       | 15q24.1    | AK127877           | 100287559      | ENSG00000260898 |                    | NR_040107  |
| HGNC:28141 | AFAP1-AS1       | 4p16.1     | BC004397           | 84740          |                 | 23333711           | NM_032654  |
| HGNC:41334 | AFF2-IT1        | Xq28       |                    |                | ENSG00000223516 |                    |            |
| HGNC:41427 | AGAP1-IT1       | 2q37.2     |                    | 100506749      | ENSG00000235529 |                    |            |
| HGNC:48633 | AGAP2-AS1       | 12q14.1    | BC039697, BC069024 | 100130776      | ENSG00000255737 | 25392693           | NR_027032  |
| HGNC:48617 | AGBL1-AS1       | 15q25.3    |                    | 727915         | ENSG00000260125 |                    |            |
| HGNC:41482 | AGBL4-IT1       | 1p33       |                    |                | ENSG00000225623 |                    |            |
| HGNC:41133 | AGBL5-AS1       | 2p23.3     |                    |                | ENSG00000231636 |                    |            |
| HGNC:41484 | AGBL5-IT1       | 2p23.3     |                    |                | ENSG00000229122 |                    |            |
| HGNC:20988 | AGPAT4-IT1      | 6q25.3     | AK026765           | 79992          |                 |                    | NR_024277  |
| HGNC:34515 | AIRN            | 6q25.3     |                    | 100271873      | ENSG00000268257 | 18789384, 19008856 |            |
| HGNC:41304 | AKT3-IT1        | 1q44       |                    |                | ENSG00000228939 |                    |            |
| HGNC:40244 | ALDH1L1-AS1     | 3q21.3     |                    |                | ENSG00000250218 |                    |            |
| HGNC:42446 | ALDH1L1-AS2     | 3q21.3     |                    |                | ENSG00000246022 |                    |            |
| HGNC:41409 | ALG9-IT1        | 11q23.1    |                    |                | ENSG00000254450 |                    |            |
| HGNC:41277 | ALG13-AS1       | Xq23       |                    |                | ENSG00000229487 |                    |            |
| HGNC:48670 | ALKBH3-AS1      | 11p11.2    |                    | 100507300      | ENSG00000244926 |                    |            |
| HGNC:41305 | ALMS1-IT1       | 2p13.1     | BC041487           | 100874291      | ENSG00000230002 |                    | NR_046762  |
| HGNC:51342 | ALOX12-AS1      | 17p13.1    | AK074580           | 100506713      | ENSG00000215067 |                    | NR_040089  |
| HGNC:41306 | AMMECR1-IT1     | Xq23       |                    |                | ENSG00000224142 |                    |            |
| HGNC:39891 | ANKRD10-IT1     | 13q34      |                    | 100505494      | ENSG00000229152 |                    |            |
| HGNC:41298 | ANKRD33B-AS1    | 5p15.2     |                    |                | ENSG00000250106 |                    |            |
| HGNC:48618 | ANKRD34C-AS1    | 15q25.1    | DA336675, DA364073 | 729911         | ENSG00000259234 |                    | NR_038997  |

|            |              |             |                    |           |                 |          |           |
|------------|--------------|-------------|--------------------|-----------|-----------------|----------|-----------|
| HGNC:41477 | ANKRD44-IT1  | 2q33.1      |                    | 101927547 | ENSG00000236977 |          |           |
| HGNC:40016 | ANO1-AS1     | 11q13.3     |                    |           | ENSG00000254902 |          |           |
| HGNC:33275 | ANO1-AS2     | 11q13.3     | AW592641, EF419887 | 100009613 | ENSG00000254417 |          |           |
| HGNC:25672 | ANP32A-IT1   | 15q23       | AK021784           | 80035     |                 | 14702039 | NR_026808 |
| HGNC:41307 | AOAH-IT1     | 7p14.2      |                    | 100874264 | ENSG00000230539 |          |           |
| HGNC:44114 | AP4B1-AS1    | 1p13.2      | AK123199           | 100287722 | ENSG00000226167 |          | NR_037864 |
| HGNC:27152 | APCDD1L-AS1  | 20q13.32    | AI077602, AK054637 | 149773    | ENSG00000231290 |          | NR_034147 |
| HGNC:40079 | APOA1-AS     | 11q23.3     | DA327409           |           | ENSG00000235910 | 24388749 |           |
| HGNC:43836 | APOBEC3B-AS1 | 22q13.1     | CX754295           |           | ENSG00000249310 |          |           |
| HGNC:44173 | APTR         | 7q11.23     | AF290475           | 100505854 | ENSG00000214293 | 24748121 | NR_038361 |
| HGNC:26399 | AQP4-AS1     | 18q12.1     | AK055069           | 147429    | ENSG00000260372 |          |           |
| HGNC:39993 | ARAP1-AS1    | 11q13.4     |                    |           | ENSG00000256007 |          |           |
| HGNC:39994 | ARAP1-AS2    | 11q13.4     |                    | 100506020 | ENSG00000245148 |          |           |
| HGNC:51593 | ARF4-AS1     | 3p14.3      | BF793425, AI127075 |           | ENSG00000272146 |          |           |
| HGNC:20279 | ARHGAP5-AS1  | 14q12       | BC007251           | 84837     | ENSG00000258655 |          | NR_027263 |
| HGNC:42944 | ARHGAP22-IT1 | 10q11.22    | AK093071           | 100689073 | ENSG00000248682 |          |           |
| HGNC:40792 | ARHGAP26-AS1 | 5q31.3      |                    |           | ENSG00000226272 |          |           |
| HGNC:41429 | ARHGAP26-IT1 | 5q31.3      |                    |           | ENSG00000230789 |          |           |
| HGNC:41235 | ARHGAP31-AS1 | 3q13.33     |                    |           | ENSG00000241155 |          |           |
| HGNC:40083 | ARHGEF3-AS1  | 3p14.3      |                    | 100874200 | ENSG00000240198 |          |           |
| HGNC:39816 | ARHGEF7-AS1  | 13q34       |                    |           | ENSG00000227352 |          |           |
| HGNC:40717 | ARHGEF7-AS2  | 13q34       |                    |           | ENSG00000235875 |          |           |
| HGNC:41408 | ARHGEF7-IT1  | 13q34       |                    |           | ENSG00000233644 |          |           |
| HGNC:41401 | ARHGEF9-IT1  | Xq11.1      |                    |           | ENSG00000231729 |          |           |
| HGNC:39996 | ARHGEF19-AS1 | 1p36.13     |                    |           | ENSG00000234166 |          |           |
| HGNC:41048 | ARHGEF26-AS1 | 3q25.2      |                    | 100507524 | ENSG00000243069 |          |           |
| HGNC:41483 | ARHGEF38-IT1 | 4q24        |                    |           | ENSG00000249885 |          |           |
| HGNC:41407 | ARID4B-IT1   | 1q42.3      |                    |           |                 |          |           |
| HGNC:41008 | ARMC2-AS1    | 6q21        | BG504478           |           | ENSG00000230290 |          |           |
| HGNC:41038 | ARMCX3-AS1   | Xq22.1      |                    | 100128574 | ENSG00000228275 |          |           |
| HGNC:49892 | ARNTL2-AS1   | 12p11.23    |                    | 101928646 | ENSG00000245311 |          |           |
| HGNC:40785 | ARPP21-AS1   | 3p22.3      |                    |           | ENSG00000230830 |          |           |
| HGNC:23395 | ARRDC1-AS1   | 9q34.3      | AF267857           | 85026     | ENSG00000203993 |          | NR_122035 |
| HGNC:44145 | ARRDC3-AS1   | 5q14.3      | BC043415           | 100129716 |                 |          | NR_027435 |
| HGNC:40085 | ARSD-AS1     | Xp22.33     |                    | 100506356 | ENSG00000229851 |          |           |
| HGNC:24998 | ASAP1-IT1    | 8q24.21     | AF161539           | 29065     |                 | 11042152 | NR_002765 |
| HGNC:48917 | ASAP1-IT2    | 8q24.21     |                    | 100507117 |                 |          | NR_045385 |
| HGNC:25442 | ASB16-AS1    | 17q21.31    | AL833953           | 339201    | ENSG00000267080 |          | NR_049729 |
| HGNC:44146 | ASH1L-AS1    | 1q22        | BC017347           | 645676    | ENSG00000235919 |          | NR_027023 |
| HGNC:41449 | ASH1L-IT1    | 1q22        |                    |           | ENSG00000227773 |          |           |
| HGNC:25811 | ASMTL-AS1    | Xp22.33 and | AK023392           | 80161     | ENSG00000236017 | 14702039 | XR_040863 |
| HGNC:51175 | ASTN2-AS1    | 9q33.1      | AK097822           | 100128505 | ENSG00000229105 |          | NR_033973 |
| HGNC:49496 | ATE1-AS1     | 10q26.13    |                    | 100130887 | ENSG00000226864 |          | NR_120495 |
| HGNC:40914 | ATG10-AS1    | 5q14.1      |                    |           | ENSG00000248192 |          |           |
| HGNC:41455 | ATG10-IT1    | 5q14.1      |                    |           | ENSG00000236447 |          |           |
| HGNC:28262 | ATP1A1-AS1   | 1p13.1      | BC007373           | 84852     | ENSG00000203865 | 12477932 | NR_024124 |
| HGNC:40088 | ATP1B3-AS1   | 3q23        |                    |           | ENSG00000244124 |          |           |
| HGNC:51370 | ATP2A1-AS1   | 16p11.2     | BX099641, AI015924 | 100289092 | ENSG00000260442 |          | NR_046287 |
| HGNC:41309 | ATP2B2-IT1   | 3p25.3      |                    |           | ENSG00000236999 |          |           |
| HGNC:41310 | ATP2B2-IT2   | 3p25.3      |                    |           | ENSG00000224771 |          |           |
| HGNC:51118 | ATP6V1B1-AS1 | 2p13.3      |                    | 101927750 | ENSG00000239322 |          |           |
| HGNC:44180 | ATP6V0E2-AS1 | 7q36.1      | BC028735           | 401431    | ENSG00000204934 |          | NR_027040 |
| HGNC:40645 | ATP11A-AS1   | 13q34       |                    |           | ENSG00000232684 |          |           |
| HGNC:41095 | ATP13A4-AS1  | 3q29        |                    | 101929198 | ENSG00000225473 |          |           |

|            |              |          |                     |           |                 |                      |           |
|------------|--------------|----------|---------------------|-----------|-----------------|----------------------|-----------|
| HGNC:41281 | ATP13A5-AS1  | 3q29     |                     |           | ENSG00000236508 |                      |           |
| HGNC:51838 | ATXN2-AS     | 12q24.12 |                     | 102723619 | ENSG00000258099 |                      |           |
| HGNC:10561 | ATXN8OS      | 13q21    | AF126749            | 6315      | ENSG00000230223 | 10192387, 16804541   | NR_002717 |
| HGNC:51558 | AZIN1-AS1    | 8q22.3   |                     | 100506753 | ENSG00000253320 |                      | NR_126338 |
| HGNC:16424 | B3GALT5-AS1  | 21q22.2  | AF426266            | 114041    | ENSG00000184809 | 12036297             | NR_026542 |
| HGNC:49910 | B4GALT1-AS1  | 9p21.1   |                     | 101929639 | ENSG00000233554 | 26315939             | NR_108108 |
| HGNC:40090 | B4GALT4-AS1  | 3q13.33  |                     |           | ENSG00000240254 |                      |           |
| HGNC:50461 | BAALC-AS1    | 8q22.3   |                     | 100499183 | ENSG00000247081 |                      |           |
| HGNC:28595 | BAALC-AS2    | 8q22.3   | BC029562            | 157556    | ENSG00000236939 | 12477932             | NR_027071 |
| HGNC:37125 | BACE1-AS     | 11q23.3  |                     | 100379571 | ENSG00000278768 | 18587408, 21785702   | NR_037803 |
| HGNC:16024 | BACE2-IT1    | 21q22.2  |                     | 282569    | ENSG00000224388 |                      |           |
| HGNC:40008 | BACH1-AS1    | 21q21.3  |                     |           | ENSG00000232118 |                      |           |
| HGNC:40006 | BACH1-IT1    | 21q21.3  | AF317902            |           | ENSG00000248476 |                      |           |
| HGNC:40007 | BACH1-IT2    | 21q21.3  |                     |           | ENSG00000228817 |                      |           |
| HGNC:16455 | BACH1-IT3    | 21q21.3  | BX100223            | 54147     | ENSG00000234293 |                      |           |
| HGNC:44342 | BAIAP2-AS1   | 17q25.3  | AK027350, AK056555, | 440465    | ENSG00000226137 |                      | NR_026857 |
| HGNC:43877 | BANCR        | 9q21.11  | AA442164            | 100885775 |                 | 22581800, 22673151,  | NR_047671 |
| HGNC:50673 | BARX1-AS1    | 9q22.32  |                     | 101928040 | ENSG00000235601 |                      |           |
| HGNC:50700 | BBOX1-AS1    | 11p14.2  | DA865512            |           | ENSG00000254560 |                      |           |
| HGNC:22170 | BCAR4        | 16p13.13 |                     | 400500    | ENSG00000262117 | 16778085, 23202989   |           |
| HGNC:44113 | BCDIN3D-AS1  | 12q13.12 | BC014925            | 100286844 | ENSG00000258057 |                      | NR_027499 |
| HGNC:1022  | BCYRN1       | 2p16     | AF020057            | 618       | ENSG00000236824 | 9858834, 8265590, 17 | NR_001568 |
| HGNC:20608 | BDNF-AS      | 11p14.1  | AY054391            | 497258    | ENSG00000245573 | 15666411, 22446693   | NR_002832 |
| HGNC:51114 | BEAN1-AS1    | 16q21    |                     | 101927726 | ENSG00000261656 |                      |           |
| HGNC:28425 | BFSP2-AS1    | 3q22.1   |                     | 85003     | ENSG00000249993 | 12477932             |           |
| HGNC:49033 | BGLT3        | 11p15.4  | AY034471, KF110790  | 103344929 | ENSG00000260629 | 24837367             |           |
| HGNC:44471 | BHLHE40-AS1  | 3p26.1   | AK056892, AK311646  | 100507582 | ENSG00000235831 |                      |           |
| HGNC:25868 | BIN3-IT1     | 8p21.3   | AK024169, DN996902  | 80094     |                 | 12477932             |           |
| HGNC:40641 | BIRC6-AS1    | 2p22.3   |                     |           | ENSG00000230046 | 22196729             |           |
| HGNC:50490 | BIRC6-AS2    | 2p22.3   | AA883483, BX093813  |           |                 | 22196729             |           |
| HGNC:51290 | BISPR        | 19p13.11 |                     | 105221694 | ENSG00000269640 | 25620967             | NR_130765 |
| HGNC:48597 | BLACAT1      | 1q32.1   | BX640973            | 101669762 |                 | 23688781             |           |
| HGNC:40096 | BMP7-AS1     | 20q13.31 |                     | 102723590 | ENSG00000235032 |                      | NR_110631 |
| HGNC:50864 | BMPR1B-AS1   | 4q22.3   |                     | 100507012 | ENSG00000249599 |                      |           |
| HGNC:35125 | BOK-AS1      | 2q37.3   |                     | 100379249 | ENSG00000234235 | 19287972             | NR_033346 |
| HGNC:42922 | BOLA3-AS1    | 2p13.1   | BC030102, AK123453  | 100507171 | ENSG00000225439 |                      | NR_045634 |
| HGNC:13228 | BPESC1       | 3q23     | AF196865            | 60467     | ENSG00000232416 | 10995571             | NR_026783 |
| HGNC:41311 | BRD2-IT1     | 6p21.32  |                     |           | ENSG00000223837 |                      |           |
| HGNC:44171 | BRE-AS1      | 2p23.2   | BC014088            | 100302650 |                 |                      | NR_028308 |
| HGNC:40614 | BRWD1-AS1    | 21q22.2  |                     |           | ENSG00000238141 |                      |           |
| HGNC:16423 | BRWD1-AS2    | 21q22.2  | AF426265            | 103091865 | ENSG00000255568 | 12036297             |           |
| HGNC:41920 | BRWD1-IT1    | 21q22.2  |                     |           | ENSG00000237373 |                      |           |
| HGNC:40102 | BSN-AS1      | 3p21.31  |                     |           | ENSG00000235120 |                      |           |
| HGNC:42445 | BSN-AS2      | 3p21.31  |                     | 100132677 | ENSG00000226913 |                      | NR_038866 |
| HGNC:40959 | BTBD9-AS1    | 6p21.2   |                     | 100505567 | ENSG00000226533 |                      |           |
| HGNC:21223 | BVES-AS1     | 6q21     | AL137368            | 154442    | ENSG00000203808 |                      | NR_037157 |
| HGNC:44148 | BZRAP1-AS1   | 17q22    | AK090885            | 100506779 |                 |                      | NR_038410 |
| HGNC:44351 | C1QTNF1-AS1  | 17q25.3  |                     | 100507410 | ENSG00000265096 |                      |           |
| HGNC:39906 | C1QTNF9-AS1  | 13q12.12 |                     |           | ENSG00000240868 |                      |           |
| HGNC:39839 | C1QTNF9B-AS1 | 13q12.12 |                     | 542767    | ENSG00000205861 | 15930275             |           |
| HGNC:27461 | C1RL-AS1     | 12p13.31 | AL833364            | 283314    | ENSG00000205885 |                      | NR_026947 |
| HGNC:49464 | C2-AS1       | 6p21.3   | BX100594            | 102060414 |                 |                      | NR_104191 |
| HGNC:41063 | C3orf67-AS1  | 3p14.2   | AK090895            | 101929238 | ENSG00000242428 |                      |           |
| HGNC:39753 | C4A-AS1      | 6p21.33  |                     |           | ENSG00000233627 |                      |           |

|            |               |          |                       |           |                 |                    |           |
|------------|---------------|----------|-----------------------|-----------|-----------------|--------------------|-----------|
| HGNC:39752 | C4B-AS1       | 6p21.33  |                       |           | ENSG00000229776 |                    |           |
| HGNC:49679 | C5orf66-AS1   | 5q31.1   |                       | 101927953 | ENSG00000249082 | 26158411           | NR_105049 |
| HGNC:27964 | C5orf66-AS2   | 5q31.1   |                       | 340073    | ENSG00000249647 | 12477932           |           |
| HGNC:39767 | C6orf47-AS1   | 6p21.33  |                       |           | ENSG00000227198 |                    |           |
| HGNC:27840 | C8orf34-AS1   | 8q13.2   | BC041480              | 286189    | ENSG00000248801 | 12477932           | NR_038877 |
| HGNC:50444 | C8orf37-AS1   | 8q22.1   |                       | 100616530 | ENSG00000253773 |                    |           |
| HGNC:51188 | C9orf41-AS1   | 9q21.13  | BC043649              | 101927380 | ENSG00000203321 |                    | NR_121183 |
| HGNC:48713 | C9orf135-AS1  | 9q21.12  |                       | 494558    | ENSG00000225626 |                    |           |
| HGNC:51176 | C9orf173-AS1  | 9q34.3   | AK097764              | 100129722 | ENSG00000275549 |                    | NR_038389 |
| HGNC:45007 | C10orf71-AS1  | 10q11.23 | AL598801, AL598689,   | 100506769 | ENSG00000236208 |                    |           |
| HGNC:51422 | C15orf59-AS1  | 15q24.1  |                       | 101929221 | ENSG00000260469 |                    | NR_120352 |
| HGNC:26393 | C20orf166-AS1 | 20q13.33 | AK054875              | 253868    | ENSG00000174403 |                    | NR_033263 |
| HGNC:1290  | C21orf62-AS1  | 21q22.11 |                       | 54067     | ENSG00000205930 |                    | NR_024622 |
| HGNC:16729 | C21orf91-OT1  | 21q21.1  | AY063452, AY063453    | 246312    | ENSG00000240770 | 12036297           |           |
| HGNC:51657 | CA3-AS1       | 8q21.2   |                       | 100996348 | ENSG00000253549 |                    | NR_121630 |
| HGNC:40119 | CACNA1C-AS1   | 12p13.33 |                       |           | ENSG00000246627 |                    |           |
| HGNC:40118 | CACNA1C-AS2   | 12p13.33 |                       |           | ENSG00000256271 |                    |           |
| HGNC:40117 | CACNA1C-AS3   | 12p13.33 |                       |           | ENSG00000256769 |                    |           |
| HGNC:40116 | CACNA1C-AS4   | 12p13.33 |                       |           | ENSG00000256025 |                    |           |
| HGNC:41312 | CACNA1C-IT1   | 12p13.33 |                       |           | ENSG00000256837 |                    |           |
| HGNC:41313 | CACNA1C-IT2   | 12p13.33 |                       |           | ENSG00000256257 |                    |           |
| HGNC:41314 | CACNA1C-IT3   | 12p13.33 |                       |           | ENSG00000256721 |                    |           |
| HGNC:27377 | CACNA1G-AS1   | 17q21.33 |                       | 253962    | ENSG00000250107 | 26397149           | NR_038439 |
| HGNC:40702 | CACNA2D3-AS1  | 3p14.3   |                       |           | ENSG00000243715 |                    |           |
| HGNC:31391 | CACTIN-AS1    | 19p13.3  | AK097999              | 404665    | ENSG00000226800 |                    | NR_038865 |
| HGNC:41248 | CADM2-AS1     | 3p12.1   |                       |           | ENSG00000239519 |                    |           |
| HGNC:41247 | CADM2-AS2     | 3p12.1   |                       |           | ENSG00000241648 |                    |           |
| HGNC:40812 | CADM3-AS1     | 1q23.2   |                       | 100131825 | ENSG00000225670 |                    |           |
| HGNC:42860 | CAHM          | 6q26     | BG168587              | 100526820 |                 | 24799664           | NR_037593 |
| HGNC:44682 | CALML3-AS1    | 10p15.1  | DA220455, DA770774    | 100132159 | ENSG00000205488 |                    |           |
| HGNC:41446 | CAMTA1-IT1    | 1p36.23  |                       |           | ENSG00000237402 |                    |           |
| HGNC:48839 | CAPN10-AS1    | 2q37.3   | AK024254              | 101752400 | ENSG00000260942 | 23382218           |           |
| HGNC:51408 | CARD8-AS1     | 19q13.33 |                       | 100505812 | ENSG00000268001 | 25392693           | NR_040599 |
| HGNC:42872 | CARMN         | 5q32     |                       | 728264    | ENSG00000249669 | 26423156           | NR_105059 |
| HGNC:40125 | CARS-AS1      | 11p15.4  | AK093033              |           | ENSG00000247473 |                    |           |
| HGNC:22933 | CASC2         | 10q26.12 | AJ535620              | 255082    | ENSG00000177640 |                    |           |
| HGNC:49076 | CASC6         | 6q15     | BC037927              |           | ENSG00000224944 |                    |           |
| HGNC:48905 | CASC7         | 8q24.3   | AK092172, BC033700    | 286109    | ENSG00000259758 |                    |           |
| HGNC:45129 | CASC8         | 8q24.21  |                       | 727677    | ENSG00000246228 | 24594601           | NR_024393 |
| HGNC:48906 | CASC9         | 8q21.11  | BC062758              | 101805492 | ENSG00000249395 | 25885227           |           |
| HGNC:48939 | CASC11        | 8q24.21  | BC042052              | 100270680 | ENSG00000249375 | 24594601           |           |
| HGNC:28245 | CASC15        | 6p22.3   | AK026189              | 401237    | ENSG00000272168 | 26016895, 26100672 |           |
| HGNC:48608 | CASC16        | 16q12.1  | BC034767, DB462404,   | 643714    | ENSG00000249231 |                    | NR_033920 |
| HGNC:43911 | CASC17        | 17q24.3  | BC039327              |           | ENSG00000260785 |                    |           |
| HGNC:49463 | CASC18        | 12q23.3  | AK001551              | 101929110 | ENSG00000257859 |                    |           |
| HGNC:49476 | CASC19        | 8q24.21  | BI223175, JX003871, D | 103021165 | ENSG00000254166 | 24594601           |           |
| HGNC:49477 | CASC20        | 20p12.3  | AY007089              | 101929244 | ENSG00000229876 |                    |           |
| HGNC:49836 | CASC21        | 8q24.21  | JX003867, CB104826    | 103021164 | ENSG00000253929 | 24594601           |           |
| HGNC:50627 | CASC22        | 16q12.1  | AK093211              | 283854    |                 | 24879036           |           |
| HGNC:50865 | CASC23        | 11p15.4  | BC027619              | 103581031 | ENSG00000255420 |                    |           |
| HGNC:40126 | CASK-AS1      | Xp11.4   |                       |           | ENSG00000233033 |                    |           |
| HGNC:41080 | CATIP-AS1     | 2q35     | BC038211              | 101928513 | ENSG00000225062 |                    |           |
| HGNC:41079 | CATIP-AS2     | 2q35     | CD672221              |           | ENSG00000237281 |                    |           |
| HGNC:43664 | CBR3-AS1      | 21q22.12 | BC038671              | 100506428 | ENSG00000236830 | 22264502, 24337686 | NR_038892 |

|            |              |          |                       |           |                 |                                    |
|------------|--------------|----------|-----------------------|-----------|-----------------|------------------------------------|
| HGNC:45128 | CCAT1        | 8q24.21  | HM358356, AK125310    | 100507056 | ENSG00000247844 | 23416875, 23143645, 21547902, 2451 |
| HGNC:47044 | CCAT2        | 8q24.21  | GQ911591              | 101805488 |                 | 23796952, 24504682                 |
| HGNC:41142 | CCDC13-AS1   | 3p22.1   |                       |           | ENSG00000173811 |                                    |
| HGNC:52262 | CCDC18-AS1   | 1p22.1   |                       | 100131564 | ENSG00000223745 | 26421281 NR_034089                 |
| HGNC:28416 | CCDC26       | 8q24.21  | BC026098              | 137196    | ENSG00000229140 | 16449964, 23399484                 |
| HGNC:49641 | CCDC37-AS1   | 3q21.3   |                       | 100506907 | ENSG00000249833 |                                    |
| HGNC:41089 | CCDC39-AS1   | 3q26.33  |                       |           | ENSG00000243187 |                                    |
| HGNC:51340 | CCDC144NL-AS | 17p11.2  | AK057473              | 440416    | ENSG00000233098 | NR_104185                          |
| HGNC:44134 | CCDC148-AS1  | 2q24.1   | BC021739              | 554201    | ENSG00000227480 | NR_038850                          |
| HGNC:44105 | CCDC183-AS1  | 9q34.3   | AK055547              | 100131193 | ENSG00000228544 | NR_024580                          |
| HGNC:51693 | CCEPR        | 10q21.1  |                       | 105682749 |                 | 25921283 NR_131782                 |
| HGNC:49398 | CCND2-AS1    | 12p13.32 | BG413373              |           | ENSG00000256164 |                                    |
| HGNC:49399 | CCND2-AS2    | 12p13.32 | DA223008              |           | ENSG00000255920 |                                    |
| HGNC:40130 | CCNT2-AS1    | 2q21.3   |                       | 100129961 | ENSG00000224043 |                                    |
| HGNC:43896 | CD27-AS1     | 12p13.31 | AK056500              | 678655    | ENSG00000215039 | NR_015382                          |
| HGNC:49384 | CD81-AS1     | 11p15.5  | BC042822              | 101927682 | ENSG00000238184 |                                    |
| HGNC:49735 | CDC37L1-AS1  | 9p24.1   | CK820219              | 101929351 | ENSG00000273061 |                                    |
| HGNC:41317 | CDC42-IT1    | 1p36.12  |                       |           | ENSG00000230068 |                                    |
| HGNC:31433 | CDH23-AS1    | 10q22.1  |                       |           | ENSG00000223817 |                                    |
| HGNC:48609 | CDIPT-AS1    | 16p11.2  | AK131031              | 440356    | ENSG00000214725 | NR_015396                          |
| HGNC:42399 | CDKN1A-AS1   | 6p21.1   | BX332409              | 100861512 |                 | 19008947                           |
| HGNC:23831 | CDKN2A-AS1   | 9p21.3   | AF211119              | 51198     | ENSG00000224854 | NR_024274                          |
| HGNC:34341 | CDKN2B-AS1   | 9p21.3   | BC038540              | 100048912 | ENSG00000240498 | 18048406, 17440112, NR_003529      |
| HGNC:48926 | CDR1-AS      | Xq27.1   | AK054921              | 103611090 |                 | 23446346, 23446348, 21964070       |
| HGNC:14386 | CDRT7        | 17p12    | BX093265, AI218510    | 94150     | ENSG00000259944 | 11381029                           |
| HGNC:14387 | CDRT8        | 17p12    | AI150443, CR737651, A | 94151     | ENSG00000265163 | 11381029                           |
| HGNC:25710 | CEBPA-AS1    | 19q13.11 | AK022417, BC027959    | 80054     | ENSG00000267296 | NR_026887                          |
| HGNC:51226 | CEBPB-AS1    | 20q13.13 | BX463443              | 101927559 | ENSG00000277449 | NR_125739                          |
| HGNC:1841  | CECR3        | 22q11.2  | AF277398              | 27442     | ENSG00000241832 | 11381032                           |
| HGNC:1842  | CECR5-AS1    | 22q11.2  | AF307448              | 100130717 | ENSG00000185837 | 11381032 NR_024483                 |
| HGNC:1845  | CECR7        | 22q11.2  | BC043198              | 100130418 | ENSG00000237438 | 11381032 NR_015352                 |
| HGNC:1847  | CECR9        | 22q11.2  | AF307449              | 30847     | ENSG00000231004 | 11381032                           |
| HGNC:23515 | CELF2-AS1    | 10p14    | AK097813              | 414196    | ENSG00000181800 | XR_109007                          |
| HGNC:44703 | CELF2-AS2    | 10p14    |                       | 439950    | ENSG00000237986 | NR_046108                          |
| HGNC:50302 | CELSR3-AS1   | 3p21.31  | BM714397              | 102724368 | ENSG00000228350 |                                    |
| HGNC:27055 | CEP83-AS1    | 12q22    |                       | 144486    |                 | 12477932 NR_027035                 |
| HGNC:51431 | CERS3-AS1    | 15q26.3  | AL708976, AI160488    | 102723320 | ENSG00000259430 | NR_120374                          |
| HGNC:44485 | CERS6-AS1    | 2q24.3   |                       | 100861402 | ENSG00000227617 | NR_045786                          |
| HGNC:41113 | CFAP44-AS1   | 3q13.2   |                       |           | ENSG00000243849 |                                    |
| HGNC:45243 | CFAP58-AS1   | 10q25.1  | BI551201, BX093559, I | 100505869 | ENSG00000231233 |                                    |
| HGNC:14437 | CFLAR-AS1    | 2q33     | AB053312              | 65072     | ENSG00000226312 |                                    |
| HGNC:40146 | CHKB-AS1     | 22q13.33 |                       | 100144603 | ENSG00000205559 |                                    |
| HGNC:40148 | CHL1-AS1     | 3p26.3   |                       | 101927193 | ENSG00000234661 |                                    |
| HGNC:40147 | CHL1-AS2     | 3p26.3   |                       | 642891    | ENSG00000224318 |                                    |
| HGNC:1279  | CHODL-AS1    | 21q21.1  |                       | 54075     | ENSG00000231755 |                                    |
| HGNC:40150 | CHRM3-AS1    | 1q43     | BX116264, AI672277    |           | ENSG00000234601 |                                    |
| HGNC:43725 | CHRM3-AS2    | 1q43     | AL832284, BI836697    | 100506915 | ENSG00000233355 |                                    |
| HGNC:28588 | CIRBP-AS1    | 19p13.3  | BC026041              | 148046    |                 | 12477932 NR_027271                 |
| HGNC:49426 | CISTR        | 12q13.13 | DA125942, HY042141    | 102216268 |                 | 23093776 NR_104332                 |
| HGNC:48997 | CKMT2-AS1    | 5q14.1   |                       | 100131067 | ENSG00000247572 |                                    |
| HGNC:39907 | CLDN10-AS1   | 13q32.1  |                       |           | ENSG00000223392 |                                    |
| HGNC:48586 | CLIP1-AS1    | 12q24.31 |                       | 100507066 | ENSG00000257097 |                                    |
| HGNC:30895 | CLRN1-AS1    | 3q25.1   |                       | 116933    | ENSG00000239265 | 11524702                           |
| HGNC:49095 | CLSTN2-AS1   | 3q23     | AL133103              | 101927808 | ENSG00000250433 |                                    |

|            |             |          |                              |           |                 |                     |           |
|------------|-------------|----------|------------------------------|-----------|-----------------|---------------------|-----------|
| HGNC:39893 | CLYBL-AS1   | 13q32.3  |                              | 101927465 | ENSG00000234303 |                     |           |
| HGNC:39894 | CLYBL-AS2   | 13q32.3  |                              |           | ENSG00000227659 |                     |           |
| HGNC:41031 | CNOT10-AS1  | 3p22.3   |                              |           | ENSG00000251224 |                     |           |
| HGNC:48712 | CNTFR-AS1   | 9p13.3   | BC038740, BC042806           | 415056    | ENSG00000237159 |                     |           |
| HGNC:39985 | CNTN4-AS1   | 3p26.2   |                              |           | ENSG00000237990 |                     |           |
| HGNC:39986 | CNTN4-AS2   | 3p26.3   |                              |           | ENSG00000227588 |                     |           |
| HGNC:40156 | COL4A2-AS1  | 13q34    |                              |           | ENSG00000232814 |                     |           |
| HGNC:39849 | COL4A2-AS2  | 13q34    |                              | 100129836 | ENSG00000224821 |                     |           |
| HGNC:31368 | COL5A1-AS1  | 9q34.3   | AI798815, CR748640           |           | ENSG00000204011 |                     |           |
| HGNC:23132 | COL18A1-AS1 | 21q22.3  | AK096071                     | 378832    | ENSG00000183535 |                     | NR_027498 |
| HGNC:40155 | COL18A1-AS2 | 21q22.3  |                              |           | ENSG00000224574 |                     |           |
| HGNC:2238  | COPG2IT1    | 7q32     | AF038190                     | 53844     |                 | 10995575            | NR_024086 |
| HGNC:38873 | COX10-AS1   | 17p12    |                              | 100874058 | ENSG00000236088 |                     |           |
| HGNC:39898 | CPB2-AS1    | 13q14.13 |                              | 100509894 | ENSG00000235903 |                     |           |
| HGNC:27523 | CPEB1-AS1   | 15q25.2  | BC035360                     | 283692    | ENSG00000259462 |                     | NR_046096 |
| HGNC:49082 | CPEB2-AS1   | 4p15.33  |                              | 441009    | ENSG00000247624 |                     |           |
| HGNC:30102 | CPS1-IT1    | 2q34     |                              | 29034     |                 | 12477932            | NR_002763 |
| HGNC:26327 | CRHR1-IT1   | 17q21.31 | AK057897                     | 147081    |                 |                     | NR_026905 |
| HGNC:37078 | CRNDE       | 16q12.2  |                              | 643911    | ENSG00000245694 | 23226159, 24381249, | NR_034105 |
| HGNC:51433 | CRTC3-AS1   | 15q26.1  | BG472948                     | 101926895 | ENSG00000259736 |                     | NR_120372 |
| HGNC:34405 | CRYM-AS1    | 16p12.2  |                              | 400508    | ENSG00000189149 |                     | NR_026675 |
| HGNC:51232 | CSE1L-AS1   | 20q13.13 |                              | 102723483 | ENSG00000227431 |                     | NR_110624 |
| HGNC:40882 | CSMD2-AS1   | 1p35.1   |                              | 402779    | ENSG00000231163 |                     |           |
| HGNC:28604 | CSNK1G2-AS1 | 19p13.3  | BC029585                     | 255193    | ENSG00000180846 | 12477932            | NR_033400 |
| HGNC:27882 | CSTF3-AS1   | 11p13    |                              | 338739    | ENSG00000247151 | 12477932            | NR_034027 |
| HGNC:48337 | CTBP1-AS    | 4p16.3   | AX747592, AK092548           | 285463    |                 | 23644382, 25552498  |           |
| HGNC:28307 | CTBP1-AS2   | 4p16.3   | AK056133                     | 92070     | ENSG00000196810 | 12477932            | NR_033339 |
| HGNC:28543 | CYP1B1-AS1  | 2p22.2   | BC031410                     | 285154    | ENSG00000232973 | 12477932            |           |
| HGNC:43715 | CYP4A22-AS1 | 1p33     | BQ688560                     |           | ENSG00000225506 | 20887892            |           |
| HGNC:31671 | CYP17A1-AS1 | 10q24.32 |                              | 102724307 | ENSG00000203886 |                     |           |
| HGNC:50694 | CYP51A1-AS1 | 7q21.2   | BC042829                     | 613126    | ENSG00000188693 | 24905231            |           |
| HGNC:39560 | CYYR1-AS1   | 21q21.3  | AK125338                     |           | ENSG00000197934 | 24981926            |           |
| HGNC:49443 | DAB1-AS1    | 1p32.2   |                              | 101926890 | ENSG00000226759 |                     |           |
| HGNC:51902 | DACOR1      | 15q22.33 |                              | 100131796 |                 | 26307088            |           |
| HGNC:44120 | DACT3-AS1   | 19q13.32 | BC043434                     | 100506068 | ENSG00000245598 |                     | NR_040041 |
| HGNC:51429 | DALIR       | 2q12     | BE439524, DA337013, EB386236 |           |                 | 25415054            |           |
| HGNC:28964 | DANCR       | 4q12     | BC015222                     | 57291     | ENSG00000226950 | 7788527, 22302877,  | NR_024031 |
| HGNC:50863 | DANT1       | Xq23     | CD173052                     | 106029310 | ENSG00000229335 | 26188586            |           |
| HGNC:50862 | DANT2       | Xq23     |                              | 642776    | ENSG00000235244 | 26188586            | NR_132337 |
| HGNC:30243 | DAOA-AS1    | 13q33.2  | AY138548                     | 282706    | ENSG00000232307 | 12364586, 12647258  |           |
| HGNC:43591 | DAPK1-IT1   | 9q21.33  | BQ025444                     |           | ENSG00000236709 | 22078386            |           |
| HGNC:40170 | DARS-AS1    | 2q21.3   |                              | 101928243 | ENSG00000231890 |                     |           |
| HGNC:43904 | DBET        | 4q35.2   | JQ639078                     | 100419743 | ENSG00000281591 | 22541069            |           |
| HGNC:24155 | DBH-AS1     | 9q34.2   | AF129263                     | 138948    | ENSG00000225756 | 10686491, 26393879  | NR_002783 |
| HGNC:44151 | DCTN1-AS1   | 2p13.1   | BC042946                     | 100189589 | ENSG00000237737 |                     | NR_024463 |
| HGNC:39889 | DCUN1D2-AS  | 13q34    | AI203167                     |           | ENSG00000233613 |                     |           |
| HGNC:40171 | DDC-AS1     | 7p12.1   |                              | 100129427 | ENSG00000226122 |                     |           |
| HGNC:28694 | DDR1-AS1    | 6p21.3   | AL137624                     | 414771    | ENSG00000237775 |                     |           |
| HGNC:44176 | DDX11-AS1   | 12p11.21 | AK096360                     | 100506660 | ENSG00000245614 |                     | NR_038927 |
| HGNC:39771 | DDX39B-AS1  | 6p21.33  |                              |           | ENSG00000234006 |                     |           |
| HGNC:42517 | DENND5B-AS1 | 12p11.21 |                              |           | ENSG00000255867 |                     |           |
| HGNC:41152 | DENND6A-AS1 | 3p14.3   | AW183704                     |           | ENSG00000239801 |                     |           |
| HGNC:50592 | DEPDC1-AS1  | 1p31.2   |                              | 101927220 | ENSG00000234264 |                     |           |
| HGNC:16757 | DGCR5       | 22q11    | X91348                       | 26220     | ENSG00000237517 | 8659529             | NR_002733 |

|            |             |                  |                    |           |                 |                    |           |
|------------|-------------|------------------|--------------------|-----------|-----------------|--------------------|-----------|
| HGNC:17227 | DGCR9       | 22q11.21         | L77571             | 25787     |                 | 8776594            |           |
| HGNC:17864 | DGCR10      | 22q11            | L77559             | 26222     |                 | 8776594            |           |
| HGNC:17226 | DGCR11      | 22q11.21         | L77561             | 25786     |                 | 8776594            |           |
| HGNC:17225 | DGCR12      | 22q11.21         | L77562             | 25784     |                 | 8776594            |           |
| HGNC:43441 | DGUOK-AS1   | 2p13.1           |                    |           | ENSG00000237883 |                    |           |
| HGNC:23175 | DHRS4-AS1   | 14q11.2          | AF116636           | 55449     | ENSG00000215256 | 22891334           | NR_023921 |
| HGNC:38713 | DHRSX-IT1   | Xp22.33 and Yp11 |                    |           | ENSG00000223571 |                    |           |
| HGNC:16972 | DIAPH2-AS1  | Xq31.33          |                    |           | ENSG00000236256 | 8133036, 7736777   |           |
| HGNC:39915 | DIAPH3-AS1  | 13q21.2          |                    |           | ENSG00000227528 |                    |           |
| HGNC:39916 | DIAPH3-AS2  | 13q21.2          |                    |           | ENSG00000223815 |                    |           |
| HGNC:43017 | DICER1-AS1  | 14q32.13         | BC040596           | 400242    | ENSG00000235706 |                    | NR_015415 |
| HGNC:44153 | DIO2-AS1    | 14q31.1          | BC039670           | 100628307 | ENSG00000258766 |                    | NR_038355 |
| HGNC:20348 | DIO3OS      | 14q32.31         | AF305836           | 64150     | ENSG00000258498 | 14962667           | NR_002770 |
| HGNC:41430 | DIP2A-IT1   | 21q22.3          |                    | 100862692 | ENSG00000223692 |                    |           |
| HGNC:50636 | DIRC3-AS1   | 2q35             | CO245227           |           | ENSG00000233143 |                    |           |
| HGNC:41325 | DISC1-IT1   | 1q42.2           |                    |           | ENSG00000226758 |                    |           |
| HGNC:33625 | DISC1FP1    | 11q14.3          | AK130626, EU302123 | 101929222 | ENSG00000261645 |                    | NR_104190 |
| HGNC:2889  | DISC2       | 1q42.1           | AF222981           | 27184     |                 | 10814723, 15478311 | NR_002227 |
| HGNC:13747 | DLEU1       | 13q14.3          | Y15227             | 10301     | ENSG00000176124 | 9395242, 11406609  | NR_002605 |
| HGNC:50496 | DLEU1-AS1   | 13q14.3          | BM264234           |           | ENSG00000229323 |                    |           |
| HGNC:13748 | DLEU2       | 13q14            | Y15228             | 8847      | ENSG00000231607 | 9395242, 11072235  | NR_002612 |
| HGNC:39966 | DLEU7-AS1   | 13q14.3          |                    |           | ENSG00000237152 |                    |           |
| HGNC:44154 | DLG1-AS1    | 3q29             | BC039329           | 100507086 | ENSG00000227375 |                    | NR_038289 |
| HGNC:37132 | DLG2-AS1    | 11q14.1          | AF525782           | 100302690 |                 | 13130513           |           |
| HGNC:40182 | DLG3-AS1    | Xq13.1           |                    |           | ENSG00000231651 |                    |           |
| HGNC:45109 | DLG5-AS1    | 10q22.3          |                    | 100128292 | ENSG00000233871 |                    | NR_024585 |
| HGNC:31676 | DLGAP1-AS1  | 18p11.31         |                    | 649446    | ENSG00000177337 |                    |           |
| HGNC:28146 | DLGAP1-AS2  | 18p11.31         | BC005130           | 84777     | ENSG00000262001 |                    |           |
| HGNC:27317 | DLGAP1-AS3  | 18p11.31         |                    | 201477    | ENSG00000263724 | 12477932           |           |
| HGNC:44333 | DLGAP1-AS4  | 18p11.31         | BI755422, CK005798 |           | ENSG00000263878 |                    |           |
| HGNC:27586 | DLGAP1-AS5  | 18p11.31         |                    | 284215    | ENSG00000261520 |                    |           |
| HGNC:50467 | DLGAP2-AS1  | 8p23.3           |                    | 100507435 | ENSG00000253267 |                    |           |
| HGNC:51223 | DLGAP4-AS1  | 20q11.23         | BC039668           | 101926987 | ENSG00000232907 |                    | NR_109939 |
| HGNC:50638 | DLX2-AS1    | 2q31.1           | DB036501, AA625909 |           | ENSG00000236651 |                    |           |
| HGNC:37151 | DLX6-AS1    | 7q21.3           |                    | 285987    | ENSG00000231764 | 16705037           | NR_015448 |
| HGNC:40183 | DLX6-AS2    | 7q21.3           |                    | 100873931 |                 |                    |           |
| HGNC:40185 | DMD-AS3     | Xp21.1           |                    |           | ENSG00000236828 |                    |           |
| HGNC:48594 | DNAH17-AS1  | 17q25.3          |                    | 100996295 | ENSG00000267432 |                    |           |
| HGNC:49846 | DNAJB5-AS1  | 9p13.3           | DA679664           | 101926900 |                 |                    |           |
| HGNC:41029 | DNAJB8-AS1  | 3q21.3           |                    | 285224    | ENSG00000242049 |                    |           |
| HGNC:39808 | DNAJC3-AS1  | 13q32.1          |                    | 100289274 | ENSG00000247400 |                    |           |
| HGNC:31432 | DNAJC9-AS1  | 10q22.2          | BC043233           | 414245    | ENSG00000236756 |                    |           |
| HGNC:42943 | DNAJC27-AS1 | 2p23.3           |                    | 729723    | ENSG00000224165 |                    | NR_034113 |
| HGNC:41494 | DNM3-IT1    | 1q24.3           |                    |           | ENSG00000233540 |                    |           |
| HGNC:41228 | DNM3OS      | 1q24.3           |                    | 100628315 | ENSG00000230630 | 19029138, 20400975 | NR_038397 |
| HGNC:20431 | DNMBP-AS1   | 10q24.2          | AK098111           | 100188954 | ENSG00000227695 |                    |           |
| HGNC:40876 | DOCK4-AS1   | 7q31.1           |                    | 100506413 | ENSG00000225572 |                    |           |
| HGNC:40672 | DOCK9-AS1   | 13q32.3          | AI027206           |           | ENSG00000229918 |                    |           |
| HGNC:43696 | DOCK9-AS2   | 13q32.3          | AF339771           |           | ENSG00000260992 |                    |           |
| HGNC:44147 | DPH6-AS1    | 15q14            | BC025664           | 100507466 | ENSG00000248079 |                    | NR_038251 |
| HGNC:50706 | DPP9-AS1    | 19p13.3          |                    | 100131094 | ENSG00000205790 |                    |           |
| HGNC:40941 | DPP10-AS1   | 2q14.1           |                    | 389023    | ENSG00000235026 |                    |           |
| HGNC:40940 | DPP10-AS2   | 2q14.1           |                    |           | ENSG00000235717 |                    |           |
| HGNC:40939 | DPP10-AS3   | 2q14.1           |                    | 101927591 | ENSG00000231538 |                    |           |



|            |              |          |                    |           |                 |                    |             |
|------------|--------------|----------|--------------------|-----------|-----------------|--------------------|-------------|
| HGNC:40195 | DPYD-AS1     | 1p21.3   |                    |           | ENSG00000232878 |                    |             |
| HGNC:40196 | DPYD-AS2     | 1p21.3   |                    |           | ENSG00000235777 |                    |             |
| HGNC:41326 | DPYD-IT1     | 1p21.3   |                    |           | ENSG00000232542 |                    |             |
| HGNC:27082 | DRAIC        | 15q23    | BC104435           | 145837    | ENSG00000245750 | 25700553           | NR_026979   |
| HGNC:40197 | DSCAM-AS1    | 21q22.2  |                    | 100506492 | ENSG00000235123 |                    |             |
| HGNC:41327 | DSCAM-IT1    | 21q22.2  |                    |           | ENSG00000233756 |                    |             |
| HGNC:51116 | DSCAS        | 18q12.1  |                    | 101927698 | ENSG00000265888 |                    |             |
| HGNC:41328 | DSCR4-IT1    | 21q22.13 |                    |           | ENSG00000223608 |                    |             |
| HGNC:16301 | DSCR9        | 21q22    | AB066100           | 257203    | ENSG00000230366 | 12168953           | NR_026719   |
| HGNC:16302 | DSCR10       | 21q22.13 | AB066291           | 259234    | ENSG00000233316 | 12168953           | NR_027695.1 |
| HGNC:51115 | DSG1-AS1     | 18q12.1  |                    | 101927718 | ENSG00000266729 |                    |             |
| HGNC:51311 | DSG2-AS1     | 18q12.1  | BC042986           | 100652770 | ENSG00000264859 |                    | NR_045216   |
| HGNC:48569 | DUBR         | 3q13.12  |                    | 344595    | ENSG00000243701 | 24886442, 25686699 | NR_028301   |
| HGNC:41329 | E2F3-IT1     | 6p22.3   |                    |           | ENSG00000224707 |                    |             |
| HGNC:42328 | EAF1-AS1     | 3p25.1   |                    |           | ENSG00000249786 |                    |             |
| HGNC:49045 | EDNRB-AS1    | 13q22.3  | BC031243           | 100505518 | ENSG00000225579 |                    | NR_103853   |
| HGNC:49501 | EDRF1-AS1    | 10q26.13 | AA868453, BX091673 | 101927983 | ENSG00000236991 |                    | XR_246200   |
| HGNC:39999 | EFCAB6-AS1   | 22q13.2  |                    |           | ENSG00000223843 |                    |             |
| HGNC:44108 | EFCAB14-AS1  | 1p33     | BX113937           | 100130197 | ENSG00000228237 |                    | NR_038827   |
| HGNC:41169 | EGFLAM-AS1   | 5p13.1   |                    |           | ENSG00000249491 |                    |             |
| HGNC:41168 | EGFLAM-AS2   | 5p13.2   |                    | 100506475 | ENSG00000248572 |                    |             |
| HGNC:41167 | EGFLAM-AS3   | 5p13.2   |                    |           | ENSG00000249071 |                    |             |
| HGNC:41166 | EGFLAM-AS4   | 5p13.2   | BC014585           |           | ENSG00000248730 |                    |             |
| HGNC:40207 | EGFR-AS1     | 7p11.2   |                    | 100507500 | ENSG00000224057 | 26271667           | NR_047551   |
| HGNC:49077 | EGLN3-AS1    | 14q13.1  | AA147919           |           | ENSG00000258897 |                    |             |
| HGNC:37129 | EGOT         | 3p26.1   | BC039547           | 100126791 | ENSG00000235947 | 17351112, 22303364 | NR_004428   |
| HGNC:51418 | EHD4-AS1     | 15q15.1  | CF887666, CF891641 | 101928363 | ENSG00000259883 |                    | NR_120332   |
| HGNC:44133 | EHHADH-AS1   | 3q27.2   | BC047598           | 339926    | ENSG00000223358 |                    | NR_038990   |
| HGNC:48714 | EHMT1-IT1    | 9q34.3   | AK127990, BX106199 | 643210    |                 |                    |             |
| HGNC:39751 | EHMT2-AS1    | 6p21.33  |                    |           | ENSG00000237080 |                    |             |
| HGNC:40208 | EIF1AX-AS1   | Xp22.12  |                    |           | ENSG00000225037 |                    |             |
| HGNC:44555 | EIF1B-AS1    | 3p22.1   | AK309874, BC045736 | 440952    |                 |                    | NR_033965   |
| HGNC:40209 | EIF2B5-AS1   | 3q27.1   |                    |           | ENSG00000230215 |                    |             |
| HGNC:41330 | EIF2B5-IT1   | 3q27.1   |                    |           | ENSG00000227509 |                    |             |
| HGNC:48616 | EIF3J-AS1    | 15q21.1  |                    | 645212    | ENSG00000179523 |                    |             |
| HGNC:49511 | ELDR         | 7p11.2   | DB084610           | 102725541 |                 |                    |             |
| HGNC:39071 | ELFN1-AS1    | 7p22.3   | BX119057           | 101927125 | ENSG00000236081 | 24707484           |             |
| HGNC:40765 | ELMO1-AS1    | 7p14.2   | DA058843           |           | ENSG00000224101 |                    |             |
| HGNC:44156 | ELOVL2-AS1   | 6p24.2   | BC038757           | 100506409 | ENSG00000230314 |                    | NR_038962   |
| HGNC:49223 | EMC3-AS1     | 3p25.3   |                    | 442075    | ENSG00000180385 |                    |             |
| HGNC:48331 | EML2-AS1     | 19q13.32 |                    | 100287177 | ENSG00000267757 |                    | NR_130728   |
| HGNC:18511 | EMX2OS       | 10q26.11 | AY117034           | 196047    | ENSG00000229847 | 12573261           | NR_002791   |
| HGNC:40214 | ENO1-AS1     | 1p36.23  |                    | 100505975 | ENSG00000230679 |                    |             |
| HGNC:41331 | ENO1-IT1     | 1p36.23  |                    |           | ENSG00000236269 |                    |             |
| HGNC:42396 | ENOX1-AS1    | 13q14.11 |                    |           | ENSG00000233821 |                    |             |
| HGNC:42397 | ENOX1-AS2    | 13q14.11 |                    |           | ENSG00000238189 |                    |             |
| HGNC:45203 | ENTPD1-AS1   | 10q24.1  |                    | 728558    | ENSG00000226688 |                    | NR_038444   |
| HGNC:26710 | ENTPD3-AS1   | 3p22.1   |                    | 285266    | ENSG00000223797 | 12477932           | NR_040100   |
| HGNC:50504 | EP300-AS1    | 22q13.2  |                    | 101927279 | ENSG00000231993 |                    |             |
| HGNC:30749 | EPB41L4A-AS1 | 5q22.2   | AB048207           | 114915    | ENSG00000224032 | 9490301            | NR_015370   |
| HGNC:25643 | EPB41L4A-AS2 | 5q22.2   |                    | 54508     | ENSG00000278921 |                    |             |
| HGNC:27799 | EPHA1-AS1    | 7q35     | AL833583           | 285965    | ENSG00000229153 |                    | NR_033897   |
| HGNC:50602 | EPHA5-AS1    | 4q13.1   |                    | 100144602 | ENSG00000250846 |                    |             |
| HGNC:40849 | EPN2-AS1     | 17p11.2  |                    | 100874018 | ENSG00000235397 |                    | NR_048576   |

|            |            |          |                       |           |                 |                    |             |
|------------|------------|----------|-----------------------|-----------|-----------------|--------------------|-------------|
| HGNC:41445 | EPN2-IT1   | 17p11.2  |                       | 100874309 |                 |                    | NR_046824   |
| HGNC:1229  | ERC2-IT1   | 3p14.3   | U88965                | 711       |                 | 9653645            | NR_024615   |
| HGNC:41431 | ERI3-IT1   | 1p34.1   |                       |           | ENSG00000233602 |                    |             |
| HGNC:49404 | ERICD      | 8q24.3   | BX099671              |           |                 | 24168400           |             |
| HGNC:32290 | ERIC1-AS1  | 8p23.3   | BC022082, BC038783    | 619343    | ENSG00000237647 | 26393913           |             |
| HGNC:41093 | ERIC3-AS1  | 1p31.1   | BX092187              | 101927320 | ENSG00000234497 |                    |             |
| HGNC:41205 | ERIC6-AS1  | 3q25.1   | AI146376, AA262424    | 101928085 | ENSG00000240137 |                    |             |
| HGNC:39079 | ESRG       | 3p14.3   |                       | 790952    | ENSG00000265992 | 17803967, 21861197 | NR_027122   |
| HGNC:40222 | ETV5-AS1   | 3q27.2   |                       |           | ENSG00000234197 |                    |             |
| HGNC:40223 | EVX1-AS    | 7p15.2   | DB455833, DB260732    |           | ENSG00000253405 |                    |             |
| HGNC:26596 | EWSAT1     | 15q23    | AK091087              | 283673    | ENSG00000212766 | 25401475           | NR_026949   |
| HGNC:25175 | EXOC3-AS1  | 5p15.33  | BC014011              | 116349    | ENSG00000221990 | 12477932           | NR_126522   |
| HGNC:27985 | EXTL3-AS1  | 8p21.1   | BC043205              | 101929402 | ENSG00000246339 | 12477932           |             |
| HGNC:40609 | EZR-AS1    | 6q25.3   | AI831881, BE552153    |           | ENSG00000233893 |                    |             |
| HGNC:40225 | F10-AS1    | 13q34    |                       |           | ENSG00000231882 |                    |             |
| HGNC:27725 | F11-AS1    | 4q35.2   | BC038717              | 285441    | ENSG00000251165 | 12477932           |             |
| HGNC:43713 | FALEC      | 1q21.3   | AL713297              | 100874054 | ENSG00000228126 | 20887892, 25203321 | NR_051960   |
| HGNC:41276 | FAM3D-AS1  | 3p14.2   | BG215913              |           | ENSG00000244383 | 25904139           |             |
| HGNC:19370 | FAM13A-AS1 | 4q22.1   | AK126217              | 285512    | ENSG00000248019 | 15234000           | NR_002806   |
| HGNC:23667 | FAM27B     | 9q21.11  |                       | 100133121 | ENSG00000278763 |                    | NR_027422   |
| HGNC:23668 | FAM27C     | 9q13     |                       | 100132948 | ENSG00000154537 |                    | NR_027421   |
| HGNC:32015 | FAM27D1    | 9p11.2   |                       | 724094    | ENSG00000275493 |                    | XR_132873   |
| HGNC:32013 | FAM27E2    | 9p11.2   |                       | 100289124 | ENSG00000276135 |                    | XR_078687   |
| HGNC:28655 | FAM27E3    | 9q21.11  |                       | 100131997 | ENSG00000274026 | 12477932           | NR_103833   |
| HGNC:44415 | FAM27E4    | 9q13     |                       | 100132439 | ENSG00000204805 |                    |             |
| HGNC:32410 | FAM27E5    | 17p11.2  | BC031617              | 284123    | ENSG00000178130 |                    | NR_028336   |
| HGNC:23955 | FAM41AY1   | Yq11.221 | BC042981              | 340618    | ENSG00000224989 | 12477932           | NR_028083   |
| HGNC:37135 | FAM41AY2   | Yq11.222 |                       | 100302526 | ENSG00000226362 |                    | NR_028084   |
| HGNC:27635 | FAM41C     | 1p36.33  | BC047940              | 284593    | ENSG00000230368 | 12477932           | NR_027055   |
| HGNC:49499 | FAM53B-AS1 | 10q26.13 | BI457689, AA620732, A | 101927944 | ENSG00000233334 |                    | XR_246199   |
| HGNC:30444 | FAM66A     | 8p23.1   |                       | 100133172 | ENSG00000227888 |                    | NR_026789   |
| HGNC:28890 | FAM66B     | 8p23.1   |                       | 100128890 | ENSG00000215374 |                    | NR_027423   |
| HGNC:21644 | FAM66C     | 12p13.31 |                       | 440078    | ENSG00000226711 |                    | NR_026788   |
| HGNC:24159 | FAM66D     | 8p23.1   |                       | 100132923 | ENSG00000255052 |                    | NR_027425   |
| HGNC:18735 | FAM66E     | 8p23.1   |                       | 100132103 | ENSG00000225725 |                    |             |
| HGNC:32029 | FAM74A1    | 9p12     |                       | 401507    | ENSG00000215112 |                    | NR_026803   |
| HGNC:32030 | FAM74A2    | 9p12     |                       | 653114    |                 |                    | XR_036862   |
| HGNC:32031 | FAM74A3    | 9q21.11  |                       | 728495    | ENSG00000274355 |                    | NR_026801   |
| HGNC:32032 | FAM74A4    | 9q12     |                       | 401508    | ENSG00000274583 |                    | NR_026802   |
| HGNC:34036 | FAM74A6    | 9q12     |                       | 653123    | ENSG00000274516 |                    | NG_009678.1 |
| HGNC:34037 | FAM74A7    | 9p11.2   |                       | 100996582 | ENSG00000277260 |                    | XR_078406   |
| HGNC:48658 | FAM83A-AS1 | 8q24.13  | AY211907              | 100131726 | ENSG00000204949 |                    | NR_024479   |
| HGNC:16113 | FAM83C-AS1 | 20q11.22 | AL121753              | 140846    | ENSG00000235214 |                    |             |
| HGNC:48720 | FAM83H-AS1 | 8q24.3   |                       | 100128338 | ENSG00000203499 | 25864709           |             |
| HGNC:27233 | FAM87A     | 8p23.3   | BC037297              | 157693    |                 | 12477932           |             |
| HGNC:32236 | FAM87B     | 1p36.33  | AK097327              | 400728    | ENSG00000177757 |                    |             |
| HGNC:28069 | FAM95A     | 2q11.1   | AL137712              | 90499     |                 |                    | NR_038409   |
| HGNC:32318 | FAM95B1    | 9p11.2   | AL833349              | 100133036 | ENSG00000223839 |                    | NR_026759   |
| HGNC:45272 | FAM95C     | 9p13.1   |                       | 100289137 |                 |                    | NR_047651   |
| HGNC:32368 | FAM99A     | 11p15.5  | AK124823              | 387742    | ENSG00000205866 |                    |             |
| HGNC:32369 | FAM99B     | 11p15.5  | CR627417              | 100132464 | ENSG00000205865 |                    |             |
| HGNC:32334 | FAM138A    | 1p36.33  |                       | 645520    | ENSG00000237613 | 11779631, 15233989 | NR_026818   |
| HGNC:33582 | FAM138B    | 2q13     |                       | 654412    | ENSG00000226516 | 11779631, 15233989 | NR_026821   |
| HGNC:32333 | FAM138C    | 9p24.3   |                       | 654835    | ENSG00000218839 | 11779631, 15233989 | NR_026822   |

|            |             |          |                     |           |                 |                     |           |
|------------|-------------|----------|---------------------|-----------|-----------------|---------------------|-----------|
| HGNC:33583 | FAM138D     | 12p13.33 |                     | 677784    | ENSG00000249054 | 11779631, 15233989  | NR_026823 |
| HGNC:32335 | FAM138E     | 15q26.3  |                     | 100124412 | ENSG00000248893 | 11779631, 15233989  | NR_026819 |
| HGNC:33581 | FAM138F     | 19p13.3  |                     | 641702    | ENSG00000282591 | 11779631, 15233989  | NR_026820 |
| HGNC:41503 | FAM155A-IT1 | 13q33.3  |                     |           | ENSG00000227248 |                     |           |
| HGNC:15548 | FAM167A-AS1 | 8p23.1   | AJ301563            | 83656     | ENSG00000184608 |                     | NR_026814 |
| HGNC:45006 | FAM170B-AS1 | 10q11.23 |                     | 100506733 | ENSG00000234736 |                     | NR_038973 |
| HGNC:20133 | FAM181A-AS1 | 14q32.12 |                     | 283592    | ENSG00000258584 |                     | NR_027004 |
| HGNC:27239 | FAM201A     | 9p12     | BC041970            | 158228    | ENSG00000204860 | 12477932            | NR_027294 |
| HGNC:49446 | FAM212B-AS1 | 1p13.2   |                     | 100506343 | ENSG00000227811 |                     |           |
| HGNC:17505 | FAM215A     | 17q21.31 | AF143236            | 23591     |                 | 10948432            | NR_026770 |
| HGNC:43639 | FAM215B     | 17q21.31 | BC044941            |           | ENSG00000232300 |                     |           |
| HGNC:28223 | FAM222A-AS1 | 12q24.11 |                     | 84983     | ENSG00000255650 | 12477932            | NR_026661 |
| HGNC:30612 | FAM223A     | Xq28     | AY168775            | 100132967 | ENSG00000279245 |                     | NR_027401 |
| HGNC:34048 | FAM223B     | Xq28     |                     | 286967    | ENSG00000272681 |                     | NR_027402 |
| HGNC:37736 | FAM224A     | Yq11.222 | AK026667            | 401630    | ENSG00000233522 |                     | NR_002161 |
| HGNC:37737 | FAM224B     | Yq11.221 | AI819212            | 401629    | ENSG00000230663 |                     | NR_002160 |
| HGNC:27855 | FAM225A     | 9q32     | AL832752            | 286333    | ENSG00000231528 |                     | NR_024366 |
| HGNC:21865 | FAM225B     | 9q32     | BX647840            | 100128385 | ENSG00000225684 |                     | NR_024376 |
| HGNC:28544 | FAM226A     | Xq13     | BC041962            | 203429    |                 | 12477932            | NR_026595 |
| HGNC:31964 | FAM226B     | Xq13.1   | BC025725            | 653687    |                 | 16382448            | NR_026594 |
| HGNC:32943 | FAM230B     | 22q11.21 | BC039313, AK128837  | 642633    | ENSG00000215498 |                     | NR_108107 |
| HGNC:43915 | FANK1-AS1   | 10q26.2  | AW080472            |           | ENSG00000233409 |                     |           |
| HGNC:41485 | FAR1-IT1    | 11p15.2  |                     |           | ENSG00000254791 |                     |           |
| HGNC:40229 | FARP1-AS1   | 13q32.2  |                     |           | ENSG00000231194 |                     |           |
| HGNC:50479 | FARSA-AS1   | 19p13.2  | AW881480            |           | ENSG00000266975 |                     |           |
| HGNC:37128 | FAS-AS1     | 10q24.1  |                     | 100302740 |                 | 15829500, 24811343  |           |
| HGNC:27557 | FBXL19-AS1  | 16p11.2  | AK090544            | 283932    | ENSG00000260852 |                     | NR_024348 |
| HGNC:51147 | FBXO3-AS1   | 11p13    |                     | 101928440 | ENSG00000254508 |                     |           |
| HGNC:31025 | FBXO22-AS1  | 15q23    | AC027104            | 692224    |                 |                     | NR_003136 |
| HGNC:41489 | FBXO36-IT1  | 2q36.3   |                     |           | ENSG00000231534 |                     |           |
| HGNC:43894 | FENDRR      | 16q24.1  | AK091834            | 400550    | ENSG00000268388 | 24381249, 23369715, | NR_033925 |
| HGNC:26652 | FER1L6-AS1  | 8q24.13  |                     | 439941    | ENSG00000181171 |                     | NR_040044 |
| HGNC:26534 | FER1L6-AS2  | 8q24.13  | AK057332            | 157376    | ENSG00000253868 |                     |           |
| HGNC:41001 | FEZFI-AS1   | 7q31.32  | AK057037            | 154860    | ENSG00000230316 |                     | NR_036484 |
| HGNC:40410 | FGD5-AS1    | 3p25.1   | BC033386            | 100505641 | ENSG00000225733 |                     | NR_046251 |
| HGNC:49382 | FGF10-AS1   | 5p12     | BC042062            | 101927075 | ENSG00000248464 | 24147006            |           |
| HGNC:40234 | FGF12-AS1   | 3q28     |                     |           | ENSG00000231383 |                     |           |
| HGNC:40235 | FGF12-AS2   | 3q28     |                     |           | ENSG00000230126 |                     |           |
| HGNC:40236 | FGF12-AS3   | 3q28     |                     |           | ENSG00000226709 |                     |           |
| HGNC:44264 | FGF13-AS1   | Xq26.3   | BC023610            | 100129662 | ENSG00000226031 |                     | NR_038405 |
| HGNC:40237 | FGF14-AS1   | 13q33.1  | AI217925            | 100874081 | ENSG00000234445 |                     |           |
| HGNC:44368 | FGF14-AS2   | 13q33.1  | BC033993, BM674599, | 283481    |                 |                     | NR_036487 |
| HGNC:42774 | FGF14-IT1   | 13q33.1  |                     | 283480    | ENSG00000243319 |                     |           |
| HGNC:49627 | FIRRE       | Xq26.2   | AK097911            | 286467    | ENSG00000213468 | 24463464            | NR_026975 |
| HGNC:27913 | FLG-AS1     | 1q21.3   | BC041408, AK056431  | 339400    | ENSG00000237975 | 12477932            |           |
| HGNC:40239 | FLNB-AS1    | 3p14.3   |                     | 100506906 | ENSG00000244161 |                     |           |
| HGNC:39077 | FLVCRI-AS1  | 1q32.3   |                     | 642946    | ENSG00000198468 | 11943475            | NR_027285 |
| HGNC:39081 | FMR1-AS1    | Xq27.3   |                     | 100126270 |                 | 17921506, 18213394  | NR_024499 |
| HGNC:41333 | FMR1-IT1    | Xq27.3   |                     |           | ENSG00000236337 |                     |           |
| HGNC:41460 | FNDC1-IT1   | 6q25.3   |                     |           | ENSG00000235086 |                     |           |
| HGNC:49789 | FOCAD-AS1   | 9p21.3   | AI288976, AW363020  | 101929548 | ENSG00000227071 |                     |           |
| HGNC:50665 | FOXC2-AS1   | 16q24.1  | AW271272            | 103752587 | ENSG00000260944 | 26408180            | NR_125795 |
| HGNC:50650 | FOXCUT      | 6p25.3   | AW002296            |           |                 | 24889262, 25031703  |           |
| HGNC:50658 | FOXD1-AS1   | 5q13.2   | AA769738            |           | ENSG00000247993 |                     |           |

|            |             |          |                     |           |                 |                                   |           |
|------------|-------------|----------|---------------------|-----------|-----------------|-----------------------------------|-----------|
| HGNC:44256 | FOX2-AS1    | 1p33     | BC006113            | 84793     | ENSG00000237424 |                                   | NR_026878 |
| HGNC:40241 | FOX3-AS1    | 1p31.3   | KJ493778            | 100996301 | ENSG00000230798 |                                   |           |
| HGNC:50663 | FOXG1-AS1   | 14q12    | DA239559            | 103695363 | ENSG00000257126 | 24007600                          | NR_125758 |
| HGNC:44290 | FOXN3-AS1   | 14q32.11 | BC067103            | 400236    | ENSG00000258920 |                                   | NR_036500 |
| HGNC:30119 | FOXN3-AS2   | 14q32.11 |                     | 29018     | ENSG00000259073 |                                   | NR_024620 |
| HGNC:41942 | FOXP1-AS1   | 3p13     |                     |           | ENSG00000244203 |                                   |           |
| HGNC:41335 | FOXP1-IT1   | 3p13     |                     | 100506815 | ENSG00000242094 |                                   |           |
| HGNC:50332 | FOXP4-AS1   | 6p21.1   |                     |           | ENSG00000234753 |                                   |           |
| HGNC:39964 | FREM2-AS1   | 13q13.3  |                     |           | ENSG00000225350 |                                   |           |
| HGNC:51844 | FRGCA       | 21q22.3  |                     |           | ENSG00000236663 | 26261500                          |           |
| HGNC:20129 | FRMD6-AS1   | 14q21.3  |                     | 145438    |                 |                                   | NR_037676 |
| HGNC:43637 | FRMD6-AS2   | 14q22.1  |                     |           | ENSG00000258537 |                                   |           |
| HGNC:41239 | FRMPD3-AS1  | Xq22.3   |                     |           | ENSG00000227610 |                                   |           |
| HGNC:41222 | FRMPD4-AS1  | Xp22.2   |                     |           | ENSG00000223487 |                                   |           |
| HGNC:39725 | FRY-AS1     | 13q13.1  | BC035084            | 100507099 | ENSG00000237637 |                                   |           |
| HGNC:40978 | FSIP2-AS1   | 2q32.1   |                     | 102724349 | ENSG00000231646 |                                   |           |
| HGNC:40243 | FTCD-AS1    | 21q22.3  | AA905381, AI217733  |           | ENSG00000237338 |                                   |           |
| HGNC:43758 | FTO-IT1     | 16q12.2  | CA450585            | 100505692 |                 |                                   |           |
| HGNC:37190 | FTX         | Xq13.2   | AK057701            | 100302692 | ENSG00000230590 | 12045143, 21254562,               | NR_028379 |
| HGNC:44294 | FUT8-AS1    | 14q23.3  | AK094893, BX098734, | 645431    |                 |                                   | NR_024334 |
| HGNC:48632 | FZD10-AS1   | 12q24.33 | AK123838            | 440119    | ENSG00000250208 |                                   |           |
| HGNC:44157 | GABPB1-AS1  | 15q21.2  |                     | 100129387 | ENSG00000244879 | 24036268                          | NR_024490 |
| HGNC:40249 | GABRG3-AS1  | 15q12    | DB073112, BU567553  | 101928869 | ENSG00000228740 |                                   | NR_120343 |
| HGNC:48336 | GACAT1      | 2q12.3   | DB096621            |           | ENSG00000232991 | 23645148, 24833871                |           |
| HGNC:50516 | GACAT2      | 18p11.22 | BM709340            | 100287082 | ENSG00000265962 | 24833871, 24063685, 24961350, 250 |           |
| HGNC:50847 | GACAT3      | 2p24.3   | BX375330, BX107472  |           | ENSG00000236289 | 24969565, 25077925                |           |
| HGNC:51308 | GAPLINC     | 18p11.31 | BM782281, AJ707365  | 100505592 | ENSG00000266835 | 25277524                          | NR_110429 |
| HGNC:52261 | GAS1RR      | 9q21.33  |                     | 100506834 | ENSG00000226237 | 26418365                          | NR_049794 |
| HGNC:16355 | GAS5        | 1q25.1   | BC038733            | 60674     | ENSG00000234741 | 9819378, 23726844                 | NR_002578 |
| HGNC:44119 | GAS5-AS1    | 1q25.1   | AF088026            | 100506046 | ENSG00000270084 |                                   | NR_037605 |
| HGNC:39826 | GAS6-AS1    | 13q34    |                     | 650669    | ENSG00000233695 | 23979857                          |           |
| HGNC:43694 | GAS6-AS2    | 13q34    | AK126042            | 100506394 | ENSG00000272695 |                                   | NR_024609 |
| HGNC:1197  | GAS8-AS1    | 16q24.3  | AF050080            | 750       | ENSG00000221819 | 9790751                           | NR_122031 |
| HGNC:51108 | GATA2-AS1   | 3q21.3   |                     | 101927167 | ENSG00000244300 |                                   |           |
| HGNC:33786 | GATA3-AS1   | 10p14    | BC036297, AK128810  | 399717    | ENSG00000197308 | 23870669                          | NR_104327 |
| HGNC:48840 | GATA6-AS1   | 18q11.2  | BM742401            | 100128893 | ENSG00000266010 | 23846333, 23382218                |           |
| HGNC:28126 | GCC2-AS1    | 2q12.3   | BC004487            | 644903    | ENSG00000214184 |                                   |           |
| HGNC:41244 | GCSAML-AS1  | 1q44     |                     | 148824    | ENSG00000227135 |                                   | NR_027309 |
| HGNC:43592 | GDNF-AS1    | 5p13.2   | DA359107            |           | ENSG00000248587 | 22081608                          |           |
| HGNC:40956 | GFOD1-AS1   | 6p23     |                     |           | ENSG00000237786 |                                   |           |
| HGNC:49425 | GHET1       | 7q36.1   | AK123072, BC037977  | 102723099 |                 | 24397586                          |           |
| HGNC:33885 | GHRLOS      | 3p25.3   | EF549568            | 100126793 | ENSG00000240288 | 17727735, 18954468                | NR_004431 |
| HGNC:40255 | GK-AS1      | Xp21.2   |                     |           | ENSG00000243055 |                                   |           |
| HGNC:41339 | GK-IT1      | Xp21.2   |                     |           | ENSG00000229331 |                                   |           |
| HGNC:48823 | GLIDR       | 9q21.11  | AK092305            | 389741    |                 | 23726844                          | NR_015363 |
| HGNC:51381 | GLIS2-AS1   | 16p13.3  | BX104227, AI694962  | 101926896 | ENSG00000262686 |                                   | NR_110901 |
| HGNC:28260 | GLIS3-AS1   | 9p24.2   | BC007366            | 84850     | ENSG00000237009 | 12477932                          | NM_032764 |
| HGNC:51588 | GLTSCR1-AS1 | 19q13.33 | DB210983            |           | ENSG00000269806 |                                   |           |
| HGNC:51587 | GLTSCR2-AS1 | 19q13.33 | DB337897            |           | ENSG00000269656 |                                   |           |
| HGNC:41043 | GLYCTK-AS1  | 3p21.1   |                     |           | ENSG00000242797 |                                   |           |
| HGNC:48993 | GMDS-AS1    | 6p25.3   |                     | 100508120 | ENSG00000250903 |                                   |           |
| HGNC:50451 | GNA14-AS1   | 9q21.2   | BI830360            | 101927422 | ENSG00000231373 |                                   |           |
| HGNC:24872 | GNAS-AS1    | 20q13.32 | AJ251759            | 149775    | ENSG00000235590 | 10749992                          | NR_002785 |
| HGNC:43938 | GNG12-AS1   | 1p31.3   |                     | 100289178 | ENSG00000232284 | 23871723                          |           |

|            |            |          |                     |           |                 |                    |           |
|------------|------------|----------|---------------------|-----------|-----------------|--------------------|-----------|
| HGNC:39886 | GPC5-AS1   | 13q31.3  |                     |           | ENSG00000235984 |                    |           |
| HGNC:39887 | GPC5-AS2   | 13q31.3  |                     |           | ENSG00000232885 |                    |           |
| HGNC:41340 | GPC5-IT1   | 13q31.3  |                     |           | ENSG00000236240 |                    |           |
| HGNC:39909 | GPC6-AS1   | 13q31.3  |                     |           | ENSG00000236520 |                    |           |
| HGNC:39910 | GPC6-AS2   | 13q31.3  |                     |           | ENSG00000224394 |                    |           |
| HGNC:48602 | GPR1-AS    | 2q33.3   | AB774455            | 101669764 |                 | 23764515           |           |
| HGNC:40259 | GPR50-AS1  | Xq28     |                     | 100128688 | ENSG00000234696 |                    |           |
| HGNC:44163 | GPR158-AS1 | 10p12.1  | AK094758            | 100128811 | ENSG00000233642 |                    | NR_027333 |
| HGNC:44131 | GRID1-AS1  | 10q23.1  | AK097655            | 100507470 |                 |                    | NR_038986 |
| HGNC:16458 | GRIK1-AS1  | 21q22.11 | AF107258            | 642976    | ENSG00000174680 |                    | NR_027021 |
| HGNC:1282  | GRIK1-AS2  | 21q22.11 | AY081145            | 100379661 |                 |                    | NR_033368 |
| HGNC:49478 | GRK5-IT1   | 10q26.11 |                     | 101927868 | ENSG00000228485 |                    | XR_246196 |
| HGNC:40265 | GRM5-AS1   | 11q14.2  |                     |           | ENSG00000255082 |                    |           |
| HGNC:40267 | GRM7-AS1   | 3p26.1   |                     |           | ENSG00000236202 |                    |           |
| HGNC:40266 | GRM7-AS2   | 3p26.1   |                     |           | ENSG00000237665 |                    |           |
| HGNC:42444 | GRM7-AS3   | 3p26.1   |                     | 101927347 | ENSG00000226258 |                    |           |
| HGNC:48999 | GRPEL2-AS1 | 5q32     | AI857303            |           | ENSG00000253618 |                    |           |
| HGNC:39917 | GRTP1-AS1  | 13q34    |                     |           | ENSG00000225083 |                    |           |
| HGNC:23372 | GSN-AS1    | 9q34.11  | AF220263            | 57000     | ENSG00000235865 |                    |           |
| HGNC:40269 | GTF3C2-AS1 | 2p23.3   |                     | 100505624 | ENSG00000234945 |                    |           |
| HGNC:18406 | GTSCR1     | 18q22.2  | AY262164            | 220158    | ENSG00000263417 | 12682296           |           |
| HGNC:27163 | GTSE1-AS1  | 22q13.31 | BC015721            | 150384    |                 |                    |           |
| HGNC:40270 | GYG2-AS1   | Xp22.33  |                     |           | ENSG00000235483 |                    |           |
| HGNC:27953 | H1FX-AS1   | 3q21.3   | AK091470            | 339942    | ENSG00000206417 | 14702039           | NR_026991 |
| HGNC:4713  | H19        | 11p15.5  | AF087017            | 283120    | ENSG00000130600 | 2595451, 1688465   | NR_002196 |
| HGNC:43755 | HAGLR      | 2q31.1   | BC030713            | 401022    | ENSG00000224189 | 24381249, 24555823 | NR_033979 |
| HGNC:50646 | HAGLROS    | 2q31.1   | BE798911, AA780126  | 102800310 | ENSG00000226363 |                    |           |
| HGNC:48872 | HAND2-AS1  | 4q34.1   |                     | 79804     | ENSG00000237125 | 18171985, 19348682 |           |
| HGNC:41342 | HAO2-IT1   | 1p12     |                     |           | ENSG00000230921 |                    |           |
| HGNC:33117 | HAR1A      | 20q13.33 | DQ860409, BC035016, | 768096    | ENSG00000225978 | 16915236           | NR_003244 |
| HGNC:33118 | HAR1B      | 20q13.33 | DQ860410, DQ860411  | 768097    | ENSG00000231133 | 16915236           | NR_003245 |
| HGNC:34340 | HAS2-AS1   | 8q24.13  | AY941178            | 594842    | ENSG00000248690 |                    | NR_002835 |
| HGNC:48612 | HCCAT5     | 16q22.3  |                     | 283902    | ENSG00000260880 | 20130911, 23314567 | NR_027756 |
| HGNC:40273 | HCFC1-AS1  | Xq28     |                     |           | ENSG00000235802 |                    |           |
| HGNC:21241 | HCG4       | 6p22.1   | AF036977            | 54435     | ENSG00000176998 |                    | NR_002139 |
| HGNC:22919 | HCG4B      | 6p22.1   | X81005              | 80868     | ENSG00000227262 | 10557312           | NR_001317 |
| HGNC:21243 | HCG9       | 6p21.3   | AB088085            | 10255     | ENSG00000204625 | 10727083, 10557312 | NR_028032 |
| HGNC:17707 | HCG11      | 6p22.2   | AK024111            | 493812    | ENSG00000228223 |                    |           |
| HGNC:18323 | HCG14      | 6p21     |                     |           | ENSG00000224157 |                    |           |
| HGNC:18361 | HCG15      | 6p21     |                     |           | ENSG00000227214 |                    |           |
| HGNC:20424 | HCG16      | 6p21.3   |                     |           | ENSG00000244349 |                    |           |
| HGNC:31339 | HCG17      | 6p21     | AB023055            | 414778    | ENSG00000270604 |                    | NR_052012 |
| HGNC:31337 | HCG18      | 6p21.3   | AK056160            | 414777    | ENSG00000231074 |                    | NR_024052 |
| HGNC:31334 | HCG20      | 6p21     |                     |           | ENSG00000228022 |                    |           |
| HGNC:31335 | HCG21      | 6p21     |                     |           | ENSG00000233529 |                    |           |
| HGNC:19713 | HCG23      | 6p21     |                     |           | ENSG00000228962 |                    |           |
| HGNC:23500 | HCG24      | 6p21     |                     |           | ENSG00000230313 |                    |           |
| HGNC:20196 | HCG25      | 6p21     |                     |           | ENSG00000232940 |                    |           |
| HGNC:29671 | HCG26      | 6p21.3   | AB088105            | 352961    |                 |                    | NR_002812 |
| HGNC:27366 | HCG27      | 6p21.3   | AK097442            | 253018    | ENSG00000206344 | 12477932           | NR_026791 |
| HGNC:21659 | HCP5       | 6p21.3   | D88650              | 10866     | ENSG00000206337 | 8462994, 10199916  | NR_040662 |
| HGNC:30984 | HCP5B      | 6p21.3   | BC035828            | 352990    |                 |                    |           |
| HGNC:40868 | HDAC11-AS1 | 3p25.1   |                     |           | ENSG00000244502 |                    |           |
| HGNC:48679 | HECTD2-AS1 | 10q23.32 |                     | 100188947 |                 |                    | NR_024467 |

|            |              |          |                              |           |                 |                     |           |
|------------|--------------|----------|------------------------------|-----------|-----------------|---------------------|-----------|
| HGNC:41465 | HECW1-IT1    | 7p14.1   |                              | 100127950 | ENSG00000181211 |                     |           |
| HGNC:45049 | HEIH         | 5q35.3   | BC019622                     | 100859930 |                 | 21769904, 23359273  | NR_045680 |
| HGNC:43984 | HELLPAR      | 12q23.2  | JX088243                     | 101101692 | ENSG00000281344 | 23093777            |           |
| HGNC:25810 | HEXA-AS1     | 15q23    |                              | 80072     | ENSG00000260339 | 12477932            | NR_027262 |
| HGNC:43650 | HEXDC-IT1    | 17q25.3  | AK129961                     | 100505970 |                 |                     |           |
| HGNC:42439 | HHATL-AS1    | 3p22.1   |                              |           | ENSG00000230970 |                     |           |
| HGNC:44182 | HHIP-AS1     | 4q31.21  | BC039450                     | 646576    | ENSG00000248890 |                     | NR_037595 |
| HGNC:51181 | HID1-AS1     | 17q25.1  |                              | 102723641 | ENSG00000263586 |                     | NR_110878 |
| HGNC:43014 | HIF1A-AS1    | 14q23.2  | CN270307                     | 100750246 |                 | 21897117, 24875884  |           |
| HGNC:43015 | HIF1A-AS2    | 14q23.2  |                              | 100750247 |                 | 21897117            | NR_045406 |
| HGNC:50576 | HIPK1-AS1    | 1p13.2   |                              | 101928846 | ENSG00000235527 |                     |           |
| HGNC:39762 | HLA-DQB1-AS1 | 6p21.32  |                              |           | ENSG00000223534 |                     |           |
| HGNC:26645 | HLA-F-AS1    | 6p22.1   | AK092748                     | 285830    | ENSG00000214922 |                     | NR_026972 |
| HGNC:41343 | HLCS-IT1     | 21q22.13 |                              |           | ENSG00000237646 |                     |           |
| HGNC:40554 | HLTF-AS1     | 3q24     |                              |           | ENSG00000239718 |                     |           |
| HGNC:42509 | HLX-AS1      | 1q41     | DA373928                     | 100873924 | ENSG00000257551 |                     | NR_046901 |
| HGNC:41940 | HM13-AS1     | 20q11.21 |                              |           | ENSG00000230613 |                     |           |
| HGNC:41424 | HM13-IT1     | 20q11.21 |                              |           | ENSG00000235313 |                     |           |
| HGNC:43632 | HMBOX1-IT1   | 8p12     |                              |           | ENSG00000259196 |                     |           |
| HGNC:48984 | HMG3-AS1     | 6q14.1   |                              | 100288198 | ENSG00000270362 |                     |           |
| HGNC:49149 | HMMR-AS1     | 5q34     | BU852496                     | 101927813 | ENSG00000251018 |                     |           |
| HGNC:26785 | HNF1A-AS1    | 12q24.31 | AK096009                     | 283460    | ENSG00000241388 | 24000294, 25863539  | NR_024345 |
| HGNC:49505 | HNF4A-AS1    | 20q13.12 | AF143870                     | 101927219 | ENSG00000229005 | 24344320            |           |
| HGNC:50729 | HORMAD2-AS1  | 22q12.2  |                              | 101929664 | ENSG00000227117 | 25144376            |           |
| HGNC:33510 | HOTAIR       | 12q13.13 | DQ926657                     | 100124700 | ENSG00000228630 | 17604720, 17604716  | NR_003716 |
| HGNC:37117 | HOTAIRM1     | 7p15.2   |                              | 100506311 | ENSG00000233429 | 19144990            |           |
| HGNC:37461 | HOTTIP       | 7p15.2   | GU724873                     | 100316868 | ENSG00000243766 | 21483457, 21423168, | NR_037843 |
| HGNC:43745 | HOXA-AS2     | 7p15.2   | BC035889                     | 285943    | ENSG00000253552 | 23649634            | NR_122069 |
| HGNC:43748 | HOXA-AS3     | 7p15.2   | AK091933                     | 100133311 | ENSG00000254369 |                     | NR_038831 |
| HGNC:40281 | HOXA10-AS    | 7p15.2   | AW195063, BM549446           | 100874323 | ENSG00000253187 |                     |           |
| HGNC:24957 | HOXA11-AS    | 7p15.2   |                              | 221883    | ENSG00000240990 | 9745033, 12050232   | NR_002795 |
| HGNC:43744 | HOXB-AS1     | 17q21.32 | BF875734, BE676309, AI292043 |           | ENSG00000230148 |                     |           |
| HGNC:40284 | HOXB-AS2     | 17q21.32 | DA447098, BF999536           |           | ENSG00000239552 |                     |           |
| HGNC:40283 | HOXB-AS3     | 17q21.32 | BC010732                     | 404266    | ENSG00000233101 |                     |           |
| HGNC:40285 | HOXB-AS4     | 17q21.32 | DB109357, AI940041           |           | ENSG00000242207 |                     |           |
| HGNC:43749 | HOXC-AS1     | 12q13.13 | BU619815, CA429707           | 100874363 | ENSG00000250451 |                     |           |
| HGNC:43750 | HOXC-AS2     | 12q13.13 | AI935658, BF195843           |           | ENSG00000250133 |                     |           |
| HGNC:43751 | HOXC-AS3     | 12q13.13 | BC035260                     |           | ENSG00000251151 |                     |           |
| HGNC:43753 | HOXC13-AS    | 12q13.13 | CN364530                     | 100874366 | ENSG00000249641 |                     |           |
| HGNC:43756 | HOXD-AS2     | 2q31.1   | BC034000                     | 100506783 | ENSG00000237380 |                     | NR_038435 |
| HGNC:47041 | HPN-AS1      | 19q13.12 |                              | 100128675 | ENSG00000227392 |                     |           |
| HGNC:5169  | HPVC1        | 7p11.2   | X85042                       | 3262      |                 | 7581372             | NR_004422 |
| HGNC:16071 | HPYR1        | 8q24.22  | AF200341                     | 93668     | ENSG00000253521 |                     | NR_026684 |
| HGNC:41474 | HS1BP3-IT1   | 2p24.1   |                              |           | ENSG00000231948 |                     |           |
| HGNC:40870 | HS6ST2-AS1   | Xq26.2   |                              |           | ENSG00000235849 |                     |           |
| HGNC:40289 | HTR2A-AS1    | 13q14.2  |                              |           | ENSG00000224517 |                     |           |
| HGNC:41032 | HTR3E-AS1    | 3q27.1   |                              |           | ENSG00000238020 |                     |           |
| HGNC:48956 | HTR5A-AS1    | 7q36.2   | BC031272, BC045795           | 100128264 | ENSG00000220575 |                     | NR_038945 |
| HGNC:37118 | HTT-AS       | 4p16.3   |                              | 100750326 | ENSG00000251075 | 21672921, 23756188  |           |
| HGNC:34232 | HULC         | 6p24.3   |                              | 728655    | ENSG00000251164 | 17241883, 23728852  | NR_004855 |
| HGNC:40631 | HUNK-AS1     | 21q22.11 | CD689785                     |           | ENSG00000237138 |                     |           |
| HGNC:41173 | HYI-AS1      | 1p34.2   |                              |           | ENSG00000229348 |                     |           |
| HGNC:5326  | HYMAI        | 6q24.2   | AF241534                     | 57061     |                 | 10936046            | NR_002768 |
| HGNC:32062 | IBA57-AS1    | 1q42.13  | AK057440                     | 574432    | ENSG00000203684 |                     |           |

|            |                |              |                       |           |                 |                    |           |
|------------|----------------|--------------|-----------------------|-----------|-----------------|--------------------|-----------|
| HGNC:51103 | ID2-AS1        | 2p25.1       |                       | 100506299 | ENSG00000235092 |                    |           |
| HGNC:40292 | IDH1-AS1       | 2q34         | AI492612, BE465811    | 100507475 | ENSG00000231908 |                    |           |
| HGNC:30885 | IDI2-AS1       | 10p15.3      | AF220183              | 55853     | ENSG00000232656 | 24036268           | NR_024628 |
| HGNC:43910 | IFNG-AS1       | 12q15        | AK124066, BF510189    | 100885789 | ENSG00000255733 | 11735227, 24056746 | NR_104124 |
| HGNC:49806 | IFT74-AS1      | 9p21.2       | AA960898, AI214381    | 101929602 | ENSG00000234676 |                    |           |
| HGNC:40295 | IGBP1-AS1      | Xq13.1       |                       |           | ENSG00000203588 |                    |           |
| HGNC:40294 | IGBP1-AS2      | Xq13.1       |                       |           | ENSG00000220925 |                    |           |
| HGNC:14062 | IGF2-AS        | 11p15.5      | AB030733              | 51214     | ENSG00000099869 | 10731720           | NM_016412 |
| HGNC:32674 | IGF2BP2-AS1    | 3q27.2       | AK057462              | 646600    | ENSG00000163915 |                    | NR_027317 |
| HGNC:40296 | IGFBP7-AS1     | 4q12         |                       | 255130    | ENSG00000245067 |                    |           |
| HGNC:40777 | IGSF11-AS1     | 3q13.32      |                       | 100506765 | ENSG00000239877 |                    |           |
| HGNC:44303 | IL10RB-AS1     | 21q22.11     |                       | 100288432 | ENSG00000223799 |                    | NR_038974 |
| HGNC:49094 | IL12A-AS1      | 3q25.33      | AK097161              | 101928376 | ENSG00000244040 |                    |           |
| HGNC:40298 | IL20RB-AS1     | 3q22.3       |                       |           | ENSG00000249407 |                    |           |
| HGNC:40299 | IL21-AS1       | 4q27         | BC045668              |           | ENSG00000227145 |                    |           |
| HGNC:27551 | IL21R-AS1      | 16p12.1      | AK093371              | 283888    | ENSG00000259954 |                    | NR_037158 |
| HGNC:27115 | ILF3-AS1       | 19p13.2      | BC007593, BC044911,   | 147727    |                 | 12477932           | NR_024333 |
| HGNC:6060  | INE1           | Xp11.4-p11.3 | Y10696                | 8552      | ENSG00000224975 | 9244435            | NR_024616 |
| HGNC:6061  | INE2           | Xp22.2       | Y10697                | 8551      |                 | 9244435            | NR_002725 |
| HGNC:40303 | INHBA-AS1      | 7p14.1       |                       | 285954    | ENSG00000224116 |                    | NR_027118 |
| HGNC:42691 | INTS6-AS1      | 13q14.3      | AA397528              | 100507398 | ENSG00000236778 |                    |           |
| HGNC:41180 | INTS6L-AS1     | Xq26.3       |                       |           | ENSG00000225235 |                    |           |
| HGNC:40892 | IPO9-AS1       | 1q32.1       | BI916758              |           | ENSG00000231871 |                    |           |
| HGNC:6109  | IPW            | 15q11.2      | U12897                | 3653      |                 | 7849716, 9601023   | NR_023915 |
| HGNC:41137 | IQCA1-AS1      | 2q37         | BF509914              |           | ENSG00000232893 |                    |           |
| HGNC:41297 | IQCF5-AS1      | 3p21.2       |                       | 101928999 | ENSG00000235455 |                    |           |
| HGNC:44104 | IQCH-AS1       | 15q23        |                       | 100506686 | ENSG00000259673 |                    | NR_040051 |
| HGNC:41303 | IQCJ-SCHIP1-AS | 3q25.33      |                       |           | ENSG00000242121 |                    |           |
| HGNC:50365 | IRAIN          | 15q26.3      |                       |           |                 | 25092925           |           |
| HGNC:44313 | ISM1-AS1       | 20p12.1      | BC038745, BX092222,   | 100505536 | ENSG00000226263 |                    | NR_040043 |
| HGNC:48962 | ISPD-AS1       | 7p21.2       |                       | 100506025 | ENSG00000229688 |                    |           |
| HGNC:41188 | ISX-AS1        | 22q12.3      |                       | 101926957 | ENSG00000227895 |                    |           |
| HGNC:40659 | ITCH-AS1       | 20q11.22     |                       |           | ENSG00000236388 |                    |           |
| HGNC:41397 | ITCH-IT1       | 20q11.22     |                       |           | ENSG00000231795 |                    |           |
| HGNC:51383 | ITFG1-AS1      | 16q12.1      | BE551587, BI462694, A | 101927102 | ENSG00000260281 |                    | NR_110903 |
| HGNC:49668 | ITGA9-AS1      | 3p22.2       | BC040563              | 101928153 | ENSG00000235257 |                    |           |
| HGNC:44304 | ITGB2-AS1      | 21q22.3      | BC040064, BC051807    | 100505746 | ENSG00000227039 |                    | NR_038311 |
| HGNC:40309 | ITGB5-AS1      | 3q21.2       |                       |           | ENSG00000244286 |                    |           |
| HGNC:40310 | ITIH4-AS1      | 3p21.1       |                       |           | ENSG00000239799 |                    |           |
| HGNC:20132 | ITPK1-AS1      | 14q32.12     | AK024887              | 319085    | ENSG00000258730 |                    | NR_002808 |
| HGNC:40312 | ITPKB-AS1      | 1q42.12      |                       |           | ENSG00000228548 |                    |           |
| HGNC:41349 | ITPKB-IT1      | 1q42.12      |                       | 100506443 | ENSG00000228382 |                    |           |
| HGNC:44470 | ITPR1-AS1      | 3p26.1       | BU629368              | 100996539 | ENSG00000231249 |                    |           |
| HGNC:48601 | JADRR          | 4q28.2       | KC469579              | 101669763 |                 | 24097061           |           |
| HGNC:27203 | JAKMIP2-AS1    | 5q32         | AK027578              | 153469    |                 |                    | NR_038902 |
| HGNC:40314 | JARID2-AS1     | 6p22.3       | AW340306, AW665239    | 100506681 | ENSG00000235488 |                    |           |
| HGNC:41218 | JAZF1-AS1      | 7p15.1       |                       | 100128081 | ENSG00000234336 |                    | NR_034097 |
| HGNC:48959 | JHDM1D-AS1     | 7q34         |                       | 100134229 | ENSG00000260231 |                    |           |
| HGNC:28222 | JMJD1C-AS1     | 10q21.3      | AK314171              | 84989     |                 | 12477932           | NR_027182 |
| HGNC:37191 | JPX            | Xq13.2       | AV714079              | 554203    | ENSG00000225470 | 21029862, 21254562 | NR_024582 |
| HGNC:43670 | JRKL-AS1       | 11q21        | AL706355, BE972282    |           | ENSG00000255679 |                    |           |
| HGNC:43740 | KANSL1-AS1     | 17q21.31     |                       | 644246    | ENSG00000214401 |                    | NR_034172 |
| HGNC:49510 | KANTR          | Xp11.22      | EF565109, CF994433    | 102723508 | ENSG00000232593 | 24381249           |           |
| HGNC:49147 | KBTBD11-OT1    | 8p23.3       | BX104191              |           | ENSG00000253696 |                    |           |

|            |              |          |                              |           |                 |                     |           |
|------------|--------------|----------|------------------------------|-----------|-----------------|---------------------|-----------|
| HGNC:40316 | KCNAB1-AS1   | 3q25.31  |                              |           | ENSG00000242370 |                     |           |
| HGNC:40315 | KCNAB1-AS2   | 3q25.31  |                              |           | ENSG00000240596 |                     |           |
| HGNC:39958 | KCNC4-AS1    | 1p13.3   |                              |           | ENSG00000224965 |                     |           |
| HGNC:40317 | KCND3-AS1    | 1p13.2   |                              |           | ENSG00000237556 |                     |           |
| HGNC:41350 | KCND3-IT1    | 1p13.2   |                              |           | ENSG00000232558 |                     |           |
| HGNC:41351 | KCNH1-IT1    | 1q32.2   |                              |           | ENSG00000234233 |                     |           |
| HGNC:48680 | KCNIP2-AS1   | 10q24.32 |                              | 100289509 | ENSG00000226009 |                     |           |
| HGNC:29895 | KCNIP4-IT1   | 4p15.31  | BK000166                     | 359822    |                 | 12515386            | NR_002813 |
| HGNC:43720 | KCNJ2-AS1    | 17q24.3  | AK093963                     | 400617    |                 |                     | NR_036534 |
| HGNC:41352 | KCNJ6-AS1    | 21q22.13 |                              |           | ENSG00000233213 |                     |           |
| HGNC:49901 | KCNK15-AS1   | 20q13.12 | BF195580                     |           | ENSG00000244558 | 25430712            |           |
| HGNC:51213 | KCNMA1-AS1   | 10q22.3  | BX092192                     | 101929328 | ENSG00000236467 |                     | NR_120655 |
| HGNC:51214 | KCNMA1-AS2   | 10q22.3  |                              | 101929310 | ENSG00000225497 |                     | NR_120654 |
| HGNC:51215 | KCNMA1-AS3   | 10q22.3  | AA453582, AW510993           | 101929286 | ENSG00000225652 |                     |           |
| HGNC:51409 | KCNMB2-AS1   | 3q26.32  | BG977814, BG206373, DA735220 |           | ENSG00000237978 | 25394782            |           |
| HGNC:42790 | KCNQ1-AS1    | 11p15.4  | AJ251642                     | 338653    | ENSG00000229414 |                     |           |
| HGNC:13335 | KCNQ1DN      | 11p15.5  | AB039920                     | 55539     | ENSG00000237941 | 11056398, 11063728, | NR_024627 |
| HGNC:6295  | KCNQ1OT1     | 11p15.5  |                              | 10984     | ENSG00000269821 | 10220444, 12772698  | NR_002728 |
| HGNC:40323 | KCNQ5-AS1    | 6q13     |                              |           | ENSG00000229154 |                     |           |
| HGNC:41354 | KCNQ5-IT1    | 6q13     |                              | 100507381 | ENSG00000233844 |                     |           |
| HGNC:48674 | KCTD21-AS1   | 11q14.1  |                              | 100289388 | ENSG00000246174 |                     |           |
| HGNC:40528 | KDM4A-AS1    | 1p34.1   | BC073819                     | 100132774 | ENSG00000236200 |                     | NR_033827 |
| HGNC:41384 | KDM5C-IT1    | Xp11.22  |                              |           | ENSG00000235262 |                     |           |
| HGNC:43440 | KIAA0196-AS1 | 8q24.13  |                              |           | ENSG00000253167 |                     |           |
| HGNC:50644 | KIAA1614-AS1 | 1q25.3   | AK026359                     | 103344928 | ENSG00000232586 | 24886442            |           |
| HGNC:26822 | KIF9-AS1     | 3p21.31  |                              | 285352    | ENSG00000227398 |                     |           |
| HGNC:20953 | KIF25-AS1    | 6q27     | AB016899                     | 100505879 | ENSG00000229921 | 10382971            |           |
| HGNC:41412 | KIRREL-IT1   | 1q23.1   |                              | 100505785 | ENSG00000226520 |                     |           |
| HGNC:42655 | KIRREL3-AS1  | 11q24.2  |                              |           | ENSG00000257271 |                     |           |
| HGNC:42656 | KIRREL3-AS2  | 11q24.2  |                              |           | ENSG00000254960 |                     |           |
| HGNC:26855 | KIRREL3-AS3  | 11q24.2  | AK097543                     | 283165    | ENSG00000218109 |                     |           |
| HGNC:51231 | KIZ-AS1      | 20p11.23 | BC034426                     | 101929591 | ENSG00000232712 |                     | NR_109956 |
| HGNC:25796 | KLF3-AS1     | 4p14     |                              | 79667     | ENSG00000231160 |                     |           |
| HGNC:41355 | KLF7-IT1     | 2q33.3   |                              |           | ENSG00000237892 |                     |           |
| HGNC:40850 | KLHL6-AS1    | 3q27.1   |                              |           | ENSG00000242522 |                     |           |
| HGNC:43431 | KLHL7-AS1    | 7p15.3   | AK054880                     | 100775104 | ENSG00000230658 |                     | NR_046220 |
| HGNC:31018 | KLHL30-AS1   | 2q37.3   | BC031945                     | 394261    |                 |                     |           |
| HGNC:40845 | KMT2E-AS1    | 7q22.3   |                              | 100216545 | ENSG00000239569 |                     |           |
| HGNC:42942 | KRBOX1-AS1   | 3p22.1   | AK057338                     | 100506275 | ENSG00000206552 |                     | XR_110049 |
| HGNC:49607 | KRT73-AS1    | 12q13.13 | AK128146                     | 100127967 | ENSG00000257495 |                     |           |
| HGNC:27877 | KRTAP5-AS1   | 11p15.5  |                              | 338651    | ENSG00000233930 |                     |           |
| HGNC:19842 | KTN1-AS1     | 14q22.3  |                              | 100129075 | ENSG00000186615 |                     | NR_027123 |
| HGNC:51320 | L3MBTL4-AS1  | 18p11.31 | BC040631                     | 101927150 | ENSG00000264707 |                     | NR_110765 |
| HGNC:27841 | LACTB2-AS1   | 8q13.3   |                              | 286190    | ENSG00000246366 |                     | NR_038881 |
| HGNC:40334 | LAMA5-AS1    | 20q13.33 |                              | 101928158 | ENSG00000228812 |                     |           |
| HGNC:40754 | LAMP5-AS1    | 20p12.2  |                              | 101929329 | ENSG00000225988 | 24488769            |           |
| HGNC:40823 | LAMTOR5-AS1  | 1p13.3   | HY022359, BE547292, BG718030 |           | ENSG00000224699 |                     |           |
| HGNC:50727 | LANCL1-AS1   | 2q34     | AA447268                     | 102724820 | ENSG00000234281 |                     |           |
| HGNC:40336 | LARGE-AS1    | 22q12.3  |                              | 100506195 | ENSG00000224973 |                     |           |
| HGNC:41357 | LARGE-IT1    | 22q12.3  |                              |           | ENSG00000232081 |                     |           |
| HGNC:40796 | LARS2-AS1    | 3p21.31  |                              |           | ENSG00000232455 |                     |           |
| HGNC:39912 | LATS2-AS1    | 13q12.11 |                              |           | ENSG00000233851 |                     |           |
| HGNC:48678 | LBX1-AS1     | 10q24.32 | AK096698, AK123344,          | 399806    | ENSG00000227128 |                     | NR_029380 |
| HGNC:25136 | LBX2-AS1     | 2p13.1   | AK125271, AK096725           | 151534    | ENSG00000257702 | 24905231            | NR_024606 |



|            |             |                     |                     |           |                 |                     |           |
|------------|-------------|---------------------|---------------------|-----------|-----------------|---------------------|-----------|
| HGNC:25837 | LCAL1       | 6q14.1              |                     | 80078     |                 | 25116943, 25864709  | NR_130915 |
| HGNC:51177 | LCMT1-AS1   | 16p12.1             |                     | 102723510 | ENSG00000260448 |                     | NR_120306 |
| HGNC:51178 | LCMT1-AS2   | 16p12.1             |                     | 100506655 | ENSG00000260034 |                     | NR_039998 |
| HGNC:48592 | LDLRAD4-AS1 | 18p11.21            | BC042085            | 100288122 | ENSG00000267690 |                     | NR_040031 |
| HGNC:40339 | LEF1-AS1    | 4q25                |                     | 641518    | ENSG00000232021 |                     | NR_029373 |
| HGNC:44132 | LEMD1-AS1   | 1q32.1              | AK090497            | 284576    | ENSG00000226235 |                     | NR_038425 |
| HGNC:40705 | LENG8-AS1   | 19q13.42            |                     |           | ENSG00000226696 |                     |           |
| HGNC:40340 | LGALS8-AS1  | 1q43                |                     | 100287902 | ENSG00000223776 |                     |           |
| HGNC:40341 | LHFPL3-AS1  | 7q22.2              | BC012751            | 645591    | ENSG00000226869 |                     | NR_034142 |
| HGNC:44106 | LHFPL3-AS2  | 7q22.3              | BC050337            | 723809    |                 |                     | NR_027374 |
| HGNC:40982 | LHX4-AS1    | 1q25.2              |                     | 100527964 |                 |                     |           |
| HGNC:49570 | LHX5-AS1    | 12q24.13            | DB553737            |           | ENSG00000257935 | 23382218            |           |
| HGNC:43600 | LIFR-AS1    | 5p13.1              | BC038371            | 100506495 | ENSG00000244968 |                     |           |
| HGNC:44107 | LIMD1-AS1   | 3p21.31             | AK026206            | 644714    | ENSG00000230530 |                     | NR_033947 |
| HGNC:40342 | LIMS1-AS1   | 2q12.3              | AA861200            |           | ENSG00000228763 |                     |           |
| HGNC:21553 | LIN28B-AS1  | 6q21                | AW612153, BF223582  | 100113403 | ENSG00000203809 |                     |           |
| HGNC:26885 | LINC-PINT   | 7q32.3              | BC130416            | 378805    | ENSG00000231721 | 24070194, 24381249  | NR_015431 |
| HGNC:43773 | LINC-ROR    | 18q21.31            | HQ315778            | 100885779 | ENSG00000258609 | 21057500, 23208419, | NR_048536 |
| HGNC:16224 | LINC00028   | 20q11.21            | AL121751            | 140875    | ENSG00000233354 |                     | NR_024358 |
| HGNC:16184 | LINC00029   | 20q13.33            | AL117533, BC069708, | 100144596 | ENSG00000125514 | 11780052            | NR_028295 |
| HGNC:16506 | LINC00032   | 9p21                | AF418573            | 158035    | ENSG00000231459 |                     | NR_026679 |
| HGNC:32028 | LINC00051   | 8q24.3              | BC008253            | 619434    | ENSG00000254008 |                     |           |
| HGNC:26455 | LINC00052   | 15q25.3             | AK056023            | 145978    |                 |                     | XR_017978 |
| HGNC:34521 | LINC00083   | 1q25.2              | AK125993            | 400797    | ENSG00000188585 |                     | XR_040317 |
| HGNC:31408 | LINC00092   | 9q22.32             | BC043559            | 100188953 | ENSG00000225194 |                     |           |
| HGNC:24742 | LINC00094   | 9q34                | AK092667            | 266655    | ENSG00000235106 | 12477932            |           |
| HGNC:30470 | LINC00102   | Xp22.33 and Yp11.31 |                     |           | ENSG00000230542 |                     |           |
| HGNC:31843 | LINC00106   | Xp22.33 and Yp11.32 |                     |           | ENSG00000236871 |                     |           |
| HGNC:1262  | LINC00111   | 21q22.3             | BX099637            | 54090     | ENSG00000227702 |                     |           |
| HGNC:1263  | LINC00112   | 21q22.3             |                     | 54089     | ENSG00000232401 |                     | NR_024028 |
| HGNC:1264  | LINC00113   | 21q21.3             |                     | 54088     | ENSG00000225298 |                     |           |
| HGNC:1265  | LINC00114   | 21q22.2             |                     | 400866    | ENSG00000223806 |                     | XR_041645 |
| HGNC:26211 | LINC00115   | 1p36.33             | BC017762            | 79854     | ENSG00000225880 | 12477932            | XR_017693 |
| HGNC:28717 | LINC00152   | 2p11.2              | BC009508            | 112597    | ENSG00000222041 | 24523021, 24036268, | XR_042051 |
| HGNC:1283  | LINC00158   | 21q21.3             |                     | 54072     | ENSG00000185433 |                     |           |
| HGNC:1285  | LINC00159   | 21q22.11            |                     |           | ENSG00000230323 |                     |           |
| HGNC:1294  | LINC00160   | 21q22.12            |                     | 54064     | ENSG00000230978 | 26426411            |           |
| HGNC:17138 | LINC00161   | 21q21.3             | AY063458            | 118421    | ENSG00000226935 | 12036297            |           |
| HGNC:33165 | LINC00163   | 21q22.3             | BC036902            | 727699    | ENSG00000234880 | 16826516            |           |
| HGNC:33166 | LINC00165   | 21q22.3             | BC009635            | 727701    |                 | 16826516            |           |
| HGNC:30468 | LINC00167   | 11q24.3             | AK055956            | 440072    | ENSG00000233220 |                     | XR_040639 |
| HGNC:33791 | LINC00173   | 12q24.22            | AC090670, BC038547, | 100287569 | ENSG00000196668 |                     | NR_027345 |
| HGNC:27788 | LINC00174   | 7q11.21             | AK091213            | 285908    | ENSG00000179406 |                     | NR_026873 |
| HGNC:27655 | LINC00176   | 20q13.33            |                     | 284739    | ENSG00000196421 |                     | NR_027686 |
| HGNC:37192 | LINC00184   | 1q42.3              | AJ421679            | 100302691 | ENSG00000224939 |                     |           |
| HGNC:18461 | LINC00189   | 21q22.11            | AF490769            | 193629    | ENSG00000215533 | 12036298            | NR_027072 |
| HGNC:30974 | LINC00200   | 10p15.3             | AK097673            | 399706    | ENSG00000229205 |                     | NR_015376 |
| HGNC:24672 | LINC00202-1 | 10p12.1             | AK097405            | 387644    | ENSG00000232224 |                     | NR_026795 |
| HGNC:44917 | LINC00202-2 | 10p12.1             |                     | 731789    | ENSG00000231976 |                     | NR_026794 |
| HGNC:16420 | LINC00205   | 21q22.3             | AF426264            | 102723489 | ENSG00000223768 | 12036297            |           |
| HGNC:37255 | LINC00207   | 22q13.31            | BC144508            | 388910    | ENSG00000187012 |                     | NR_028409 |
| HGNC:15535 | LINC00208   | 8p23.1              | AJ291678            |           | ENSG00000170983 |                     |           |
| HGNC:37458 | LINC00210   | 1q41                |                     |           | ENSG00000231814 |                     |           |
| HGNC:37459 | LINC00211   | 2p22.2              |                     | 101929559 | ENSG00000237803 |                     |           |

|            |             |          |          |           |                 |                     |             |
|------------|-------------|----------|----------|-----------|-----------------|---------------------|-------------|
| HGNC:20191 | LINC00216   | 14q22.3  | AF116641 | 55451     |                 |                     |             |
| HGNC:20169 | LINC00221   | 14q32.33 | AK058096 | 338005    | ENSG00000270816 |                     | NR_027457   |
| HGNC:21560 | LINC00222   | 6q21     | AY927445 | 387111    | ENSG00000203801 |                     |             |
| HGNC:20168 | LINC00226   | 14q32.33 | AW205017 | 338004    | ENSG00000276210 |                     |             |
| HGNC:13240 | LINC00229   | 22q13.3  |          |           | ENSG00000234300 |                     |             |
| HGNC:14138 | LINC00235   | 16p13.3  | AW298011 | 64493     |                 |                     | NR_024121   |
| HGNC:38166 | LINC00237   | 20p11.23 |          |           | ENSG00000225127 | 23034868            |             |
| HGNC:20100 | LINC00238   | 14q23.3  |          | 440184    | ENSG00000196553 |                     | NR_024338   |
| HGNC:20119 | LINC00239   | 14q32.31 |          | 145200    |                 |                     | NR_026774   |
| HGNC:18772 | LINC00240   | 6p21     |          | 100133205 | ENSG00000224843 |                     | NR_026775   |
| HGNC:21249 | LINC00242   | 6q28     | AK056013 | 401288    | ENSG00000229214 |                     | NR_026781   |
| HGNC:30956 | LINC00243   | 6p21.33  | AK098012 | 401247    | ENSG00000214894 |                     |             |
| HGNC:13245 | LINC00244   | 7q36     | AF107456 | 64433     |                 | 10329000            | NR_024119   |
| HGNC:31950 | LINC00251   | 8q13.1   | BX110670 | 552859    |                 |                     | NR_038901   |
| HGNC:14160 | LINC00254   | 16p13.3  | AI209093 | 64735     |                 |                     |             |
| HGNC:28770 | LINC00260   | 1q32.1   | BC000988 | 84719     |                 | 12477932            |             |
| HGNC:16189 | LINC00261   | 20p11.21 |          | 140828    | ENSG00000259974 | 23801869, 22681909, | NR_001558   |
| HGNC:17776 | LINC00264   | 10p12.1  |          | 645528    | ENSG00000233261 |                     | XR_040540   |
| HGNC:28019 | LINC00265   | 7p14.1   |          | 349114    | ENSG00000188185 | 12477932            | NR_026999   |
| HGNC:16202 | LINC00266-1 | 20q13.33 | BC118988 | 140849    | ENSG00000149656 |                     |             |
| HGNC:21112 | LINC00266-3 | 6p25.3   |          | 441123    | ENSG00000170590 |                     |             |
| HGNC:38543 | LINC00268   | 9p11.2   | AK126863 | 441426    |                 |                     |             |
| HGNC:26586 | LINC00269   | Xq13.1   | AK090929 | 100996279 | ENSG00000215162 |                     |             |
| HGNC:32526 | LINC00271   | 6q23.3   |          | 100131814 | ENSG00000231028 |                     | NR_026805   |
| HGNC:26898 | LINC00272   | 1q25.3   | AF508909 | 388719    | ENSG00000203729 | 12801632            | NM_00101089 |
| HGNC:38595 | LINC00273   | 16p11.2  | AY587847 | 649159    | ENSG00000256642 |                     | NR_038368   |
| HGNC:38663 | LINC00276   | 2p24.3   | BC035112 |           | ENSG00000230448 |                     |             |
| HGNC:38712 | LINC00278   | Yp11.31  |          |           | ENSG00000231535 |                     |             |
| HGNC:38724 | LINC00279   | Yp11.2   |          |           | ENSG00000232348 |                     |             |
| HGNC:38803 | LINC00280   | Yp11.2   |          |           | ENSG00000229643 |                     |             |
| HGNC:26737 | LINC00282   | 13q14.3  | AK094626 | 283521    |                 |                     | NR_027047   |
| HGNC:38809 | LINC00283   | 13q33.1  |          |           | ENSG00000231633 |                     |             |
| HGNC:26981 | LINC00284   | 13q14.11 | AK001938 | 121838    | ENSG00000233725 |                     | NR_026955   |
| HGNC:38515 | LINC00290   | 4q34.3   | AF088005 | 728081    | ENSG00000248197 |                     | NR_033918   |
| HGNC:39078 | LINC00293   | 8q11.1   | AK097475 | 497634    | ENSG00000253314 |                     | NR_027012   |
| HGNC:27456 | LINC00294   | 11p13    | BC046921 | 283267    |                 |                     | NR_015451   |
| HGNC:39210 | LINC00297   | 13q12.3  |          |           | ENSG00000224329 |                     |             |
| HGNC:49257 | LINC00298   | 2p25.1   |          | 339788    | ENSG00000235665 |                     |             |
| HGNC:27940 | LINC00299   | 2p25.1   | AK127578 | 339789    | ENSG00000236790 | 12477932            | NR_034135   |
| HGNC:28603 | LINC00301   | 11q12.2  | AK058123 | 283197    | ENSG00000181995 | 12477932            | NR_026946   |
| HGNC:31825 | LINC00302   | 1q21.3   | AF005082 | 388699    | ENSG00000176075 | 9344646             |             |
| HGNC:26865 | LINC00303   | 1q32.1   | AK097662 | 284573    | ENSG00000176754 |                     | NR_027902   |
| HGNC:26713 | LINC00304   | 16q24.3  | AK094020 | 283860    | ENSG00000180422 |                     | NR_024347   |
| HGNC:28597 | LINC00305   | 18q22.1  | BC029565 | 221241    | ENSG00000179676 | 12477932            | NM_152728   |
| HGNC:16727 | LINC00307   | 21q22.11 | AY063455 | 266919    | ENSG00000227342 | 12036297            |             |
| HGNC:16023 | LINC00308   | 21q21.1  | AY077696 | 54143     | ENSG00000184856 | 12036298            |             |
| HGNC:25279 | LINC00309   | 2p14     |          | 150992    | ENSG00000230923 |                     |             |
| HGNC:16414 | LINC00310   | 21q22.11 | AF426258 | 114036    | ENSG00000227456 | 12036297            | NR_027266   |
| HGNC:28312 | LINC00311   | 16q24.1  | BC030801 | 197196    | ENSG00000179219 | 12477932            | XR_017879   |
| HGNC:6662  | LINC00312   | 3p25.3   | AF086709 | 29931     | ENSG00000237697 | 12452030, 12918109, | NR_024065   |
| HGNC:16416 | LINC00313   | 21q22.3  | AF426261 | 114038    | ENSG00000185186 | 12036297, 26178480  | NR_026863   |
| HGNC:16622 | LINC00314   | 21q21.3  | AF427489 | 246705    | ENSG00000178457 | 12036297            | NR_027246   |
| HGNC:16621 | LINC00315   | 21q22.3  | AF427488 | 246704    | ENSG00000184274 | 12036297            |             |
| HGNC:19723 | LINC00316   | 21q22.3  | BG221750 | 388830    | ENSG00000237664 |                     |             |

|            |           |          |                    |           |                 |          |           |
|------------|-----------|----------|--------------------|-----------|-----------------|----------|-----------|
| HGNC:23126 | LINC00317 | 21q21.1  | BC009878           | 378828    | ENSG00000238265 |          |           |
| HGNC:19730 | LINC00319 | 21q22.3  | AK095355           | 284836    | ENSG00000188660 |          | NR_026960 |
| HGNC:19690 | LINC00320 | 21q21.1  | AK094858           | 387486    | ENSG00000224924 |          | NR_024090 |
| HGNC:33698 | LINC00322 | 21q22.3  | AK131425           | 100126693 | ENSG00000237864 | 17081983 |           |
| HGNC:19720 | LINC00323 | 21q22.3  | AK094492           | 284835    | ENSG00000226496 |          |           |
| HGNC:26628 | LINC00324 | 17p13.1  | AK092109           | 284029    | ENSG00000178977 |          |           |
| HGNC:41926 | LINC00326 | 6q23.2   |                    | 285735    | ENSG00000231023 |          | NR_026969 |
| HGNC:42009 | LINC00327 | 13q12.12 |                    | 100506697 | ENSG00000232977 |          |           |
| HGNC:42028 | LINC00328 | 21p11.2  | AF172850           | 51152     |                 |          |           |
| HGNC:42047 | LINC00330 | 13q14.12 | AK056732           | 144817    | ENSG00000235097 |          |           |
| HGNC:42048 | LINC00331 | 13q31.1  |                    |           | ENSG00000225427 |          |           |
| HGNC:42049 | LINC00332 | 13q14.11 |                    |           | ENSG00000230710 |          |           |
| HGNC:42050 | LINC00333 | 13q31.1  |                    |           | ENSG00000233349 |          |           |
| HGNC:16425 | LINC00334 | 21q22.3  | AF426268           | 114042    | ENSG00000182586 | 12036297 |           |
| HGNC:33813 | LINC00336 | 6p21.31  | AK125740           | 401253    | ENSG00000197251 |          |           |
| HGNC:28620 | LINC00337 | 1p36.31  | BC030279           | 148645    | ENSG00000225077 | 12477932 |           |
| HGNC:25011 | LINC00339 | 1p36.12  |                    | 29092     | ENSG00000218510 | 11042152 |           |
| HGNC:20353 | LINC00341 | 14q32.13 | AK024929           | 79686     |                 |          | NR_026779 |
| HGNC:42470 | LINC00342 | 2q11.1   |                    | 150759    | ENSG00000232931 |          |           |
| HGNC:42500 | LINC00343 | 13q33.2  |                    | 144920    | ENSG00000226620 |          |           |
| HGNC:42503 | LINC00345 | 13q14.3  |                    |           | ENSG00000235660 |          |           |
| HGNC:27492 | LINC00346 | 13q34    |                    | 283487    | ENSG00000255874 |          | NR_027701 |
| HGNC:27890 | LINC00347 | 13q22.1  |                    | 338864    | ENSG00000236678 | 12477932 |           |
| HGNC:42658 | LINC00348 | 13q21.33 |                    |           | ENSG00000226846 |          |           |
| HGNC:42667 | LINC00349 | 13q11    |                    |           | ENSG00000231238 |          |           |
| HGNC:42668 | LINC00350 | 13q12.11 |                    |           | ENSG00000225316 |          |           |
| HGNC:42669 | LINC00351 | 13q31.1  |                    |           | ENSG00000226317 |          |           |
| HGNC:42670 | LINC00352 | 13q12.12 |                    |           | ENSG00000227893 |          |           |
| HGNC:42671 | LINC00353 | 13q31.3  |                    | 100874139 | ENSG00000236176 |          |           |
| HGNC:42672 | LINC00354 | 13q34    |                    | 101928616 | ENSG00000226903 |          |           |
| HGNC:27061 | LINC00355 | 13q21.31 |                    | 144766    | ENSG00000227674 |          |           |
| HGNC:42678 | LINC00358 | 13q21.31 |                    |           | ENSG00000229578 |          |           |
| HGNC:42679 | LINC00359 | 13q32.1  |                    | 100887754 | ENSG00000243300 |          |           |
| HGNC:42682 | LINC00362 | 13q12.12 |                    |           | ENSG00000229483 |          |           |
| HGNC:42684 | LINC00363 | 13q31.3  | AA885151           |           | ENSG00000232849 |          |           |
| HGNC:42686 | LINC00364 | 13q21.32 |                    |           | ENSG00000230040 |          |           |
| HGNC:42687 | LINC00365 | 13q12.3  |                    |           | ENSG00000224511 |          |           |
| HGNC:42688 | LINC00366 | 13q13.3  |                    |           | ENSG00000229437 |          |           |
| HGNC:42689 | LINC00367 | 13q12.11 | BG723634           | 101930748 |                 |          |           |
| HGNC:42690 | LINC00368 | 13q34    | BG720241           | 101927802 | ENSG00000225870 |          |           |
| HGNC:42692 | LINC00370 | 13q33.3  | BF695150           |           | ENSG00000223617 |          |           |
| HGNC:42693 | LINC00371 | 13q14.3  |                    | 647166    | ENSG00000226792 |          |           |
| HGNC:42698 | LINC00374 | 13q21.1  | BG190276           |           | ENSG00000232954 |          |           |
| HGNC:42699 | LINC00375 | 13q31.1  | AW510855           |           | ENSG00000226370 |          |           |
| HGNC:42701 | LINC00376 | 13q21.31 | AA759092           |           | ENSG00000227564 |          |           |
| HGNC:42703 | LINC00377 | 13q31.1  | BG185523           |           | ENSG00000229246 |          |           |
| HGNC:42704 | LINC00378 | 13q21.2  |                    |           | ENSG00000225249 |          |           |
| HGNC:42705 | LINC00379 | 13q31.3  |                    |           | ENSG00000229557 |          |           |
| HGNC:42706 | LINC00380 | 13q31.3  | AA609658           |           | ENSG00000234625 |          |           |
| HGNC:42708 | LINC00381 | 13q22.1  |                    |           | ENSG00000226240 |          |           |
| HGNC:42709 | LINC00382 | 13q31.1  | BG717866           | 101927195 | ENSG00000229175 |          |           |
| HGNC:42710 | LINC00383 | 13q21.33 | BG527271, BM557184 | 103689913 | ENSG00000237534 |          | NR_125752 |
| HGNC:42711 | LINC00384 | 13q12.3  | BX648491           |           | ENSG00000232117 |          |           |
| HGNC:42713 | LINC00385 | 13q12.3  | AI203837           |           | ENSG00000232643 |          |           |

|            |           |          |                    |           |                 |                     |           |
|------------|-----------|----------|--------------------|-----------|-----------------|---------------------|-----------|
| HGNC:42715 | LINC00387 | 13q11    |                    |           | ENSG00000231914 |                     |           |
| HGNC:42716 | LINC00388 | 13q11    |                    |           | ENSG00000229788 |                     |           |
| HGNC:42718 | LINC00390 | 13q14.11 | AW779259           |           | ENSG00000226519 |                     |           |
| HGNC:42719 | LINC00391 | 13q32.1  |                    |           | ENSG00000238230 |                     |           |
| HGNC:42720 | LINC00392 | 13q22.1  |                    |           | ENSG00000228295 |                     |           |
| HGNC:42721 | LINC00393 | 13q22.1  |                    |           | ENSG00000224853 |                     |           |
| HGNC:42723 | LINC00395 | 13q21.31 |                    |           | ENSG00000231061 |                     |           |
| HGNC:42724 | LINC00396 | 13q34    | AA927226           |           | ENSG00000231428 |                     |           |
| HGNC:42725 | LINC00397 | 13q31.2  | AI286230           |           | ENSG00000223404 |                     |           |
| HGNC:42727 | LINC00398 | 13q12.3  |                    |           | ENSG00000237879 |                     |           |
| HGNC:42728 | LINC00399 | 13q33.3  | BX111569, AI023810 |           | ENSG00000229792 |                     |           |
| HGNC:42729 | LINC00400 | 13q14.11 |                    |           | ENSG00000229928 |                     |           |
| HGNC:42732 | LINC00402 | 13q22.1  |                    | 100507612 | ENSG00000235532 |                     |           |
| HGNC:42733 | LINC00403 | 13q34    |                    | 100505996 | ENSG00000224243 |                     |           |
| HGNC:42734 | LINC00404 | 13q34    |                    |           | ENSG00000229520 |                     |           |
| HGNC:42739 | LINC00407 | 13q14.12 | BG959100           |           | ENSG00000237585 |                     |           |
| HGNC:42740 | LINC00408 | 13q11    | BG722014           | 100652856 | ENSG00000226250 |                     |           |
| HGNC:42742 | LINC00410 | 13q31.3  |                    | 144776    | ENSG00000231674 |                     |           |
| HGNC:42744 | LINC00411 | 13q32.3  |                    |           | ENSG00000229599 |                     |           |
| HGNC:42745 | LINC00412 | 13q12.2  | AI051530           |           | ENSG00000234772 |                     |           |
| HGNC:42748 | LINC00415 | 13q12.13 |                    |           | ENSG00000231983 |                     |           |
| HGNC:42755 | LINC00421 | 13q12.11 |                    | 100287114 | ENSG00000236834 |                     |           |
| HGNC:42758 | LINC00423 | 13q13.1  |                    |           | ENSG00000226968 |                     |           |
| HGNC:42815 | LINC00424 | 13q12.11 |                    |           | ENSG00000226722 |                     |           |
| HGNC:42761 | LINC00426 | 13q12.3  |                    | 100188949 | ENSG00000238121 |                     |           |
| HGNC:42762 | LINC00427 | 13q12.3  |                    | 100507040 | ENSG00000236463 |                     |           |
| HGNC:42763 | LINC00428 | 13q14.11 | AA206719           |           | ENSG00000229546 |                     |           |
| HGNC:42765 | LINC00430 | 13q31.1  | AW661815           |           | ENSG00000233528 |                     |           |
| HGNC:42766 | LINC00431 | 13q34    | BG181389           |           | ENSG00000225760 |                     |           |
| HGNC:42768 | LINC00433 | 13q31.2  |                    |           | ENSG00000229443 |                     |           |
| HGNC:42769 | LINC00434 | 13q21.2  |                    |           | ENSG00000227336 |                     |           |
| HGNC:42772 | LINC00437 | 13q13.3  | BM927018           |           | ENSG00000236354 |                     |           |
| HGNC:42777 | LINC00440 | 13q31.2  |                    |           | ENSG00000234660 |                     |           |
| HGNC:42778 | LINC00441 | 13q14.2  |                    | 100862704 | ENSG00000231473 | 25579178            | NR_046414 |
| HGNC:42779 | LINC00442 | 13q12.11 |                    | 348021    | ENSG00000232685 |                     |           |
| HGNC:42780 | LINC00443 | 13q33.3  |                    |           | ENSG00000230156 |                     |           |
| HGNC:42781 | LINC00444 | 13q14.2  |                    |           | ENSG00000234689 |                     |           |
| HGNC:42782 | LINC00445 | 13q13.3  |                    | 100507114 | ENSG00000236036 |                     |           |
| HGNC:42783 | LINC00446 | 13q22.3  |                    | 100874175 | ENSG00000229249 |                     |           |
| HGNC:42785 | LINC00448 | 13q21.31 |                    |           | ENSG00000228669 |                     |           |
| HGNC:42786 | LINC00449 | 13q32.3  |                    |           | ENSG00000203441 |                     |           |
| HGNC:42802 | LINC00454 | 13q34    |                    | 100874178 | ENSG00000226921 |                     |           |
| HGNC:42804 | LINC00456 | 13q32.1  | BG623605           | 103625683 | ENSG00000233124 |                     |           |
| HGNC:42805 | LINC00457 | 13q13.2  |                    | 100874179 | ENSG00000225179 |                     |           |
| HGNC:42807 | LINC00458 | 13q14.3  | BC026300           | 100507428 | ENSG00000234787 |                     |           |
| HGNC:42808 | LINC00459 | 13q21.31 |                    |           | ENSG00000229307 |                     |           |
| HGNC:42809 | LINC00460 | 13q33.3  |                    | 728192    | ENSG00000233532 |                     |           |
| HGNC:42810 | LINC00461 | 5q14.3   |                    | 645323    | ENSG00000245526 | 23562822, 25209608, | NR_024384 |
| HGNC:42811 | LINC00462 | 13q14.2  |                    |           | ENSG00000233610 |                     |           |
| HGNC:42813 | LINC00463 | 13q12.13 | BM666193           | 101928922 | ENSG00000234056 |                     |           |
| HGNC:27294 | LINC00466 | 1p31.3   |                    | 199899    | ENSG00000224209 | 12477932            | NR_038252 |
| HGNC:28227 | LINC00467 | 1q32.3   | BC005997           | 84791     | ENSG00000153363 | 24586304            | NR_026761 |
| HGNC:26863 | LINC00469 | 17q25.1  | AK097638           | 283982    | ENSG00000177338 |                     | NM_182564 |
| HGNC:1225  | LINC00470 | 18p11.32 | AF295730           | 56651     | ENSG00000132204 | 11173868            | NR_023925 |

|            |           |          |                    |           |                 |                    |           |
|------------|-----------|----------|--------------------|-----------|-----------------|--------------------|-----------|
| HGNC:28668 | LINC00471 | 2q37.1   | BC033054           | 151477    | ENSG00000181798 | 12477932           | NM_173513 |
| HGNC:21380 | LINC00472 | 6q13     |                    | 79940     | ENSG00000233237 | 25865225           | NR_121612 |
| HGNC:21160 | LINC00473 | 6q27     | BC008632           | 90632     | ENSG00000223414 | 22108211           | NR_026860 |
| HGNC:23367 | LINC00474 | 9q31.3   | AB021923           | 58483     | ENSG00000204148 |                    | NM_021208 |
| HGNC:23569 | LINC00475 | 9q22.31  | AK023662           | 158314    | ENSG00000225511 |                    |           |
| HGNC:27858 | LINC00476 | 9q22.33  | AK092137           | 100128782 | ENSG00000175611 |                    |           |
| HGNC:26557 | LINC00477 | 12p12.1  | AK057456           | 144360    | ENSG00000197503 | 14702039           | NM_144667 |
| HGNC:19727 | LINC00479 | 21q22.3  | AK057397           | 150135    | ENSG00000236384 |                    |           |
| HGNC:26816 | LINC00482 | 17q25.3  | AK096740           | 284185    | ENSG00000185168 |                    | NM_178519 |
| HGNC:26080 | LINC00483 | 17q21.33 | AK000701           | 55018     | ENSG00000167117 |                    |           |
| HGNC:27862 | LINC00484 | 9q22.31  | AK095132           | 100129347 | ENSG00000235641 |                    |           |
| HGNC:27476 | LINC00485 | 12q23.2  | BC037211           | 283432    | ENSG00000258169 |                    | NR_033855 |
| HGNC:42946 | LINC00486 | 2p22.3   |                    | 285045    | ENSG00000230876 |                    | NR_027099 |
| HGNC:42947 | LINC00487 | 2p25.2   |                    | 400941    | ENSG00000205837 |                    | NR_038369 |
| HGNC:32675 | LINC00488 | 3q13.13  | AK123226           | 677779    | ENSG00000214381 |                    | NR_026767 |
| HGNC:43426 | LINC00489 | 20q11.23 | DB341379           |           | ENSG00000225759 |                    |           |
| HGNC:43428 | LINC00491 | 5q21.1   | CN270888           |           | ENSG00000250682 | 25200694           |           |
| HGNC:43429 | LINC00492 | 5q21.1   | CA314239           |           | ENSG00000250958 |                    |           |
| HGNC:43430 | LINC00493 | 20p11.23 |                    | 388789    | ENSG00000232388 | 25392693           | NR_015432 |
| HGNC:27657 | LINC00494 | 20q13.13 |                    | 284749    | ENSG00000235621 | 12477932           |           |
| HGNC:43435 | LINC00498 | 4q28.3   |                    |           | ENSG00000248397 |                    |           |
| HGNC:43436 | LINC00499 | 4q28.3   |                    |           | ENSG00000251372 |                    |           |
| HGNC:43437 | LINC00500 | 4q28.3   |                    |           | ENSG00000249381 |                    |           |
| HGNC:43439 | LINC00501 | 3q26.32  | AK055528           |           | ENSG00000203645 |                    |           |
| HGNC:43442 | LINC00502 | 10q23.31 |                    |           | ENSG00000224851 |                    |           |
| HGNC:43555 | LINC00504 | 4p15.33  |                    |           | ENSG00000248360 |                    |           |
| HGNC:43556 | LINC00505 | 1p33     |                    |           | ENSG00000225667 |                    |           |
| HGNC:43557 | LINC00506 | 3p12.1   | BC030609           | 100846978 |                 |                    |           |
| HGNC:43558 | LINC00507 | 12q24.32 |                    |           | ENSG00000256193 |                    |           |
| HGNC:43559 | LINC00508 | 12q24.32 |                    |           | ENSG00000256971 |                    |           |
| HGNC:43564 | LINC00511 | 17q24.3  | AK129994           | 400619    | ENSG00000227036 | 25864709           |           |
| HGNC:27549 | LINC00514 | 16p13.3  | AK098017           | 283875    |                 |                    | NR_033861 |
| HGNC:16019 | LINC00515 | 21q21.3  | AF086441           | 282566    |                 |                    |           |
| HGNC:19831 | LINC00517 | 14q21.1  | AA029430           | 400208    | ENSG00000259091 |                    |           |
| HGNC:28626 | LINC00518 | 6p24.3   | BC028118           | 221718    | ENSG00000183674 | 12477932, 24906614 | NR_027793 |
| HGNC:19838 | LINC00519 | 14q22.1  | BG121773           | 161342    | ENSG00000258955 |                    |           |
| HGNC:19843 | LINC00520 | 14q22.3  | BF572611           | 645687    | ENSG00000258791 |                    |           |
| HGNC:19860 | LINC00521 | 14q32.12 | BI463117           | 256369    | ENSG00000175699 |                    |           |
| HGNC:20117 | LINC00523 | 14q32.2  |                    | 283601    | ENSG00000196273 |                    | NR_024096 |
| HGNC:20118 | LINC00524 | 14q32.31 | AA843471           | 338002    | ENSG00000259023 |                    |           |
| HGNC:40290 | LINC00525 | 7p12.3   | BC007354           | 84847     | ENSG00000146666 |                    |           |
| HGNC:28278 | LINC00526 | 18p11.31 | BC010538           | 147525    |                 | 12477932           | NR_026849 |
| HGNC:17215 | LINC00527 | 21q22.2  | AJ011409           | 54748     |                 |                    |           |
| HGNC:26875 | LINC00528 | 22q11.21 | AK097861           | 200298    |                 | 14702039           |           |
| HGNC:15544 | LINC00529 | 8p23-p22 | AJ301561           | 83647     | ENSG00000236827 | 11896452           |           |
| HGNC:18690 | LINC00533 | 6p21     | AA913908, AI688709 | 387055    | ENSG00000235570 |                    |           |
| HGNC:43643 | LINC00534 | 8q21.3   |                    |           | ENSG00000253394 |                    |           |
| HGNC:43644 | LINC00535 | 8q22.1   |                    | 642924    | ENSG00000246662 |                    | NR_033858 |
| HGNC:43645 | LINC00536 | 8q23.3   | BC040336           |           | ENSG00000249917 |                    |           |
| HGNC:43654 | LINC00537 | 9q13     | BC110369           | 203274    |                 |                    |           |
| HGNC:43655 | LINC00538 | 1q32.3   | JF495099           | 100861504 |                 | 22258142           | NR_046189 |
| HGNC:43672 | LINC00539 | 13q12.11 | BG940872           | 100652865 | ENSG00000224429 |                    |           |
| HGNC:43673 | LINC00540 | 13q12.11 | AK054845, BC035104 | 100506622 |                 |                    |           |
| HGNC:43678 | LINC00543 | 13q12.2  | CB142335, AI262987 | 100132234 |                 |                    |           |

|            |           |             |                              |           |                 |                  |           |
|------------|-----------|-------------|------------------------------|-----------|-----------------|------------------|-----------|
| HGNC:43679 | LINC00544 | 13q12.3     |                              | 440131    | ENSG00000122043 |                  | NR_033889 |
| HGNC:43680 | LINC00545 | 13q12.3     | AW971998, AA514237           | 440132    | ENSG00000236094 |                  |           |
| HGNC:43682 | LINC00547 | 13q13.3     | AK092066                     | 400121    |                 |                  | NR_040244 |
| HGNC:43683 | LINC00548 | 13q14.11    | AK124383                     | 400123    |                 |                  | NR_033877 |
| HGNC:43688 | LINC00550 | 13q21.33    | BC042673                     | 338862    |                 |                  | NR_038878 |
| HGNC:43691 | LINC00551 | 13q33.3     | AK098538                     | 283483    |                 |                  |           |
| HGNC:43692 | LINC00552 | 13q34       | AK057435                     | 100130386 | ENSG00000279770 |                  | NR_028064 |
| HGNC:43697 | LINC00554 | 13q32.3     | BC068276                     |           |                 |                  |           |
| HGNC:43699 | LINC00555 | 13q33.1     | AF339825                     |           |                 |                  |           |
| HGNC:43700 | LINC00556 | 13q12.11    | AF086361                     |           |                 |                  |           |
| HGNC:43701 | LINC00557 | 13q32.1     | AF339811                     |           |                 |                  |           |
| HGNC:43702 | LINC00558 | 13q14.3     | BC041877                     | 100861552 | ENSG00000261517 |                  |           |
| HGNC:43703 | LINC00559 | 13q31.3     | BC043442                     |           |                 |                  |           |
| HGNC:43704 | LINC00560 | 13q31.2     | BC043278                     |           |                 |                  |           |
| HGNC:43705 | LINC00561 | 13q22.2     | BC034981                     |           |                 |                  |           |
| HGNC:43706 | LINC00562 | 13q14.2     | AK123146                     |           |                 |                  |           |
| HGNC:43707 | LINC00563 | 13q14.13    | U79295                       |           |                 |                  |           |
| HGNC:43708 | LINC00564 | 13q31.1     | BC039360                     |           |                 |                  |           |
| HGNC:43709 | LINC00565 | 13q34       | AK092053                     |           |                 |                  |           |
| HGNC:43710 | LINC00566 | 13q12.12    | BC038727                     |           |                 |                  |           |
| HGNC:43711 | LINC00567 | 13q34       | BC035264                     | 283486    |                 |                  |           |
| HGNC:43717 | LINC00570 | 2p25.1      | BX102688, AI493106           |           | ENSG00000224177 | 20887892         |           |
| HGNC:43721 | LINC00571 | 13q13.3     | BM023585, BF887755           |           | ENSG00000223685 |                  |           |
| HGNC:43722 | LINC00572 | 13q12.3     | BC039674                     |           | ENSG00000224405 |                  |           |
| HGNC:21598 | LINC00574 | 6q27        | AK023224                     | 80069     | ENSG00000231690 |                  | NR_026780 |
| HGNC:21342 | LINC00575 | 4q21.23     | AY316301                     | 439934    | ENSG00000231782 | 15218245         | NR_024087 |
| HGNC:43807 | LINC00578 | 3q26.32     | BX101293                     | 100505566 | ENSG00000228221 |                  |           |
| HGNC:43840 | LINC00581 | 6p22.3      | BX118339                     | 100874531 |                 | 22245136         | NR_103790 |
| HGNC:43842 | LINC00582 | 1q42.2      |                              | 100287814 | ENSG00000229228 |                  | NR_034037 |
| HGNC:31437 | LINC00583 | 9p23        |                              | 100113404 | ENSG00000205636 |                  | NR_038194 |
| HGNC:31372 | LINC00587 | 9q31.1      | BC038565                     | 414319    | ENSG00000204250 |                  |           |
| HGNC:24494 | LINC00588 | 8q12.1      |                              | 26138     | ENSG00000215117 | 11230166         | NR_026772 |
| HGNC:32299 | LINC00589 | 8p12        | BC003524, BC014230           | 619351    | ENSG00000251191 |                  | NR_026765 |
| HGNC:27474 | LINC00592 | 12q13.13    | BC039104                     | 283404    | ENSG00000258279 |                  | NR_027358 |
| HGNC:32382 | LINC00593 | 15q23       | BC031958                     | 414926    | ENSG00000259703 | 12477932         |           |
| HGNC:32358 | LINC00594 | 15q15.1     | AI278850                     | 641314    | ENSG00000259714 |                  |           |
| HGNC:31430 | LINC00595 | 10q22.3     | AA256890, BQ082446, BQ070817 |           | ENSG00000227136 |                  |           |
| HGNC:23167 | LINC00596 | 14q11.2     | BX161431, CR615368           | 414767    | ENSG00000259334 |                  |           |
| HGNC:1193  | LINC00597 | 15q23-q24   | AL109679                     | 81698     |                 |                  |           |
| HGNC:42770 | LINC00598 | 13q14.11    |                              | 646982    | ENSG00000215483 | 12764377         | NR_024505 |
| HGNC:27231 | LINC00599 | 8p23.1      | AF052108                     | 157627    | ENSG00000253230 | 8619474, 9110174 | NR_024281 |
| HGNC:43916 | LINC00601 | 10q26.2     | BF215388                     |           | ENSG00000235180 |                  |           |
| HGNC:43917 | LINC00602 | 6q27        | BC110806                     | 441177    |                 |                  | NR_027284 |
| HGNC:43918 | LINC00603 | 5p13.1      | BG181872, BX100325           |           | ENSG00000250048 |                  |           |
| HGNC:43924 | LINC00604 | 5p13.1      | AI539454, BX115904           |           | ENSG00000250585 |                  |           |
| HGNC:43928 | LINC00605 | 14q32.32    | BC035396                     | 100131366 | ENSG00000251533 |                  | NR_033938 |
| HGNC:43931 | LINC00606 | 3p25.3      | AK093398                     | 285370    | ENSG00000226567 |                  | NR_027102 |
| HGNC:43944 | LINC00607 | 2q35        | AK091865                     | 646324    | ENSG00000235770 |                  | NR_037195 |
| HGNC:27179 | LINC00608 | 2q35        | BC033552                     | 151300    | ENSG00000236445 | 12477932         |           |
| HGNC:43960 | LINC00609 | 14q13.2-q13 | DN993271                     |           | ENSG00000257585 |                  |           |
| HGNC:23262 | LINC00610 | 11p13       | AK127155                     | 399879    |                 |                  |           |
| HGNC:28621 | LINC00612 | 12p13.31    | BC028195                     | 253128    | ENSG00000214851 | 12477932         | NR_034140 |
| HGNC:44060 | LINC00613 | 4q28.3      | AW237894                     | 100507528 | ENSG00000248330 |                  |           |
| HGNC:30165 | LINC00614 | 10p12.1     |                              | 645587    | ENSG00000236983 |                  |           |

|            |           |             |                       |           |                 |                    |           |
|------------|-----------|-------------|-----------------------|-----------|-----------------|--------------------|-----------|
| HGNC:26343 | LINC00615 | 12q21.33    | AK058107              | 439916    | ENSG00000196243 |                    | NR_038868 |
| HGNC:44065 | LINC00616 | 4q28.3      |                       | 641365    | ENSG00000248307 |                    | NR_037866 |
| HGNC:20110 | LINC00618 | 14q32.2     | AA055628              | 145249    | ENSG00000225163 |                    |           |
| HGNC:31657 | LINC00619 | 10q11.21    | BC017939              | 414260    | ENSG00000204187 |                    | NR_033923 |
| HGNC:44223 | LINC00620 | 3p25.1      | BC039529              | 285375    | ENSG00000224514 | 23478628, 21368711 | NR_027103 |
| HGNC:44227 | LINC00621 | 13q12.12    | AK091626              |           | ENSG00000262619 |                    |           |
| HGNC:44251 | LINC00622 | 1p12        | AK123168, BC015390    | 644242    | ENSG00000260941 |                    | NR_036540 |
| HGNC:44252 | LINC00623 | 1q21.1      |                       | 728855    | ENSG00000226067 |                    |           |
| HGNC:44254 | LINC00624 | 1q21.1      |                       | 100289211 | ENSG00000278811 |                    |           |
| HGNC:44257 | LINC00626 | 1q24.2      | BC001841              | 79100     | ENSG00000225826 |                    | NR_024160 |
| HGNC:27008 | LINC00628 | 1q32.1      | BC015457              | 127841    |                 | 12477932           | NR_027022 |
| HGNC:44262 | LINC00629 | Xq26.3      | BQ374946              | 100506757 | ENSG00000227060 |                    | NR_038998 |
| HGNC:44263 | LINC00630 | Xq22.1      | BC032741, BC040959,   | 100287765 | ENSG00000223546 |                    | NR_038988 |
| HGNC:27865 | LINC00632 | Xq27.1      | AK054978              | 286411    | ENSG00000203930 | 24833871           |           |
| HGNC:44269 | LINC00633 | Xq26.3      | AI015085, AY730280    | 100129515 | ENSG00000224107 |                    | NR_033941 |
| HGNC:27930 | LINC00634 | 22q13.2     |                       | 339674    | ENSG00000205704 | 12477932           | NR_024355 |
| HGNC:27184 | LINC00635 | 3q13.12     | BC045586              | 151658    | ENSG00000241469 | 12477932           | NR_015414 |
| HGNC:27702 | LINC00636 | 3q13.12     |                       | 285205    | ENSG00000240423 | 12477932           | NR_015394 |
| HGNC:27069 | LINC00637 | 14q32.33    |                       | 145216    | ENSG00000258735 |                    | NR_038436 |
| HGNC:28325 | LINC00638 | 14q32.33    |                       | 196872    | ENSG00000258701 | 12477932           | NR_024396 |
| HGNC:27502 | LINC00639 | 14q21.1     | AK125018, AK127318,   | 283547    | ENSG00000259070 |                    | NR_039982 |
| HGNC:44291 | LINC00640 | 14q22.1     |                       | 283553    | ENSG00000258479 |                    | NR_038358 |
| HGNC:27511 | LINC00641 | 14q11.2     | AK092333, AK093962    | 283624    | ENSG00000258441 |                    | NR_038970 |
| HGNC:44293 | LINC00642 | 14q32.11    | BC036259, BX101323    | 400238    | ENSG00000233208 |                    | NR_033986 |
| HGNC:44296 | LINC00643 | 14q23.2     |                       | 646113    | ENSG00000186369 |                    | NR_015358 |
| HGNC:44297 | LINC00644 | 14q23.2     | AW292481              | 101954204 | ENSG00000259142 |                    | NR_104063 |
| HGNC:44299 | LINC00645 | 14q12       | BC042069, BX538073,   | 100505967 | ENSG00000258548 |                    | NR_039992 |
| HGNC:44302 | LINC00648 | 14q21.3     | AK056212, CA435241    | 100506433 | ENSG00000259129 |                    | NR_039996 |
| HGNC:44305 | LINC00649 | 21q22.11    | DA374118              | 100506334 | ENSG00000237945 | 26421281           | NR_038883 |
| HGNC:25003 | LINC00652 | 20p11.23    | AF161557, BC029555    | 29075     | ENSG00000179935 | 11042152           | NR_026883 |
| HGNC:27154 | LINC00654 | 20p12.3     | BC067900              | 149837    | ENSG00000205181 |                    | NR_015406 |
| HGNC:27304 | LINC00656 | 20p11.21    | AF258576, CA748604,   | 200261    | ENSG00000233746 |                    | NR_034149 |
| HGNC:44315 | LINC00658 | 20p12.3     | BC035192              | 100507629 | ENSG00000226995 |                    | NR_038239 |
| HGNC:44316 | LINC00659 | 20q13.33    | DA633805, DB320598    | 100652730 | ENSG00000228705 |                    | NR_046224 |
| HGNC:27002 | LINC00661 | 19p13.12    | AI184190, CR749400    | 126536    | ENSG00000205396 | 12477932           | NR_026828 |
| HGNC:27122 | LINC00662 | 19q11       | AK311452, BC045720    | 148189    |                 | 12477932           | NR_027301 |
| HGNC:28609 | LINC00663 | 19p13.11    | AK289657, BC034236,   | 284440    |                 | 12477932           | NR_026956 |
| HGNC:44319 | LINC00664 | 19p12       |                       | 400680    | ENSG00000268658 |                    | NR_037194 |
| HGNC:44323 | LINC00665 | 19q13.12    | AI282277, BC041949, I | 100506930 | ENSG00000232677 |                    | NR_038278 |
| HGNC:27906 | LINC00667 | 18p11.31    |                       | 339290    | ENSG00000263753 | 8619474, 9110174   | NR_015389 |
| HGNC:44328 | LINC00668 | 18p11.31    |                       | 400643    | ENSG00000265933 |                    | NR_034100 |
| HGNC:44338 | LINC00670 | 17p12       | BC122870, DB255288    | 284034    | ENSG00000179136 |                    | NR_034144 |
| HGNC:44339 | LINC00671 | 17q21.31    | AK055784, BC122868,   | 388387    | ENSG00000213373 |                    | NR_027254 |
| HGNC:44353 | LINC00672 | 17q12       | AK090935, BC009632    | 100505576 | ENSG00000263874 |                    | NR_038847 |
| HGNC:44354 | LINC00673 | 17q24.3     | AK000477, AK129763    | 100499467 |                 | 23040067           | NR_036488 |
| HGNC:44355 | LINC00674 | 17q24.2     | BC045718, DA232946    | 100499466 | ENSG00000237854 |                    | NR_027418 |
| HGNC:44356 | LINC00675 | 17p13.1-p12 | BC015790              | 100289255 | ENSG00000263429 |                    | NR_036581 |
| HGNC:44394 | LINC00676 | 13q34       | AW816149              |           | ENSG00000234854 |                    |           |
| HGNC:20121 | LINC00677 | 14q32.32    | AW182802              | 254299    | ENSG00000259717 |                    |           |
| HGNC:44413 | LINC00678 | 11p14.1     | CD176172, CD049147    |           | ENSG00000254934 |                    |           |
| HGNC:44417 | LINC00680 | 6p11.2      | BC011838, BC017330    | 106660612 | ENSG00000215190 |                    |           |
| HGNC:44423 | LINC00681 | 8p23.1      | BM725196, BM678210    |           | ENSG00000255494 |                    |           |
| HGNC:44466 | LINC00682 | 4p13        | BC025350              |           | ENSG00000245870 |                    |           |
| HGNC:44467 | LINC00683 | 18q23       | AK094957              | 400660    | ENSG00000266256 |                    |           |

|            |           |             |                       |           |                 |          |           |
|------------|-----------|-------------|-----------------------|-----------|-----------------|----------|-----------|
| HGNC:44268 | LINC00684 | Xq13.1      |                       | 100129407 | ENSG00000275520 |          | NR_034116 |
| HGNC:27560 | LINC00685 | Xp22.33 and | BC041934              | 283981    | ENSG00000226179 | 12477932 |           |
| HGNC:16221 | LINC00686 | 20q13.33    | D80415                | 140865    | ENSG00000237687 |          |           |
| HGNC:16194 | LINC00687 | 20p12.2     | BX092309              | 728450    | ENSG00000228422 |          | XR_109647 |
| HGNC:27217 | LINC00689 | 7q36.3      |                       | 154822    | ENSG00000231419 | 12477932 | NR_024394 |
| HGNC:44503 | LINC00690 | 3p24.3      | BC034913              | 100996597 | ENSG00000233570 |          |           |
| HGNC:44514 | LINC00691 | 3p24.2      |                       | 152024    | ENSG00000224074 |          |           |
| HGNC:27708 | LINC00692 | 3p24.2      | BC033370              | 285326    | ENSG00000230891 | 12477932 | NR_034055 |
| HGNC:44526 | LINC00693 | 3p24.1      |                       | 645206    | ENSG00000228214 |          |           |
| HGNC:44570 | LINC00694 | 3p21.31     |                       | 100506301 | ENSG00000225873 |          |           |
| HGNC:34426 | LINC00696 | 3p21.1      | AK127958              | 100128378 |                 |          | NR_027331 |
| HGNC:27720 | LINC00698 | 3p14.2      | BC039502, BC043407    | 285401    | ENSG00000244342 |          | NR_027104 |
| HGNC:27422 | LINC00700 | 10p15.3     | AK097474              | 282980    | ENSG00000234962 |          | NR_040253 |
| HGNC:44674 | LINC00701 | 10p15.3     | BC055423              | 399708    | ENSG00000234556 |          | NR_038884 |
| HGNC:44676 | LINC00702 | 10p15.1     | DA655411, DB287388,   | 100652988 | ENSG00000233117 |          |           |
| HGNC:44677 | LINC00703 | 10p15.1     | AK095699              | 100507059 | ENSG00000224382 |          |           |
| HGNC:44678 | LINC00704 | 10p15.1     | BC048320              | 100216001 | ENSG00000231298 |          | NR_024475 |
| HGNC:27874 | LINC00705 | 10p15.1     | BC104742              | 338588    | ENSG00000225269 | 12477932 | NR_015425 |
| HGNC:44690 | LINC00706 | 10p14       | DA137858, DB484295    | 100652997 |                 |          |           |
| HGNC:44691 | LINC00707 | 10p14       |                       | 100507127 | ENSG00000238266 |          | NR_038291 |
| HGNC:44694 | LINC00708 | 10p14       | BC031880              | 100507143 | ENSG00000232170 |          |           |
| HGNC:44700 | LINC00709 | 10p14       | AI761698, BX111793, C | 100507163 | ENSG00000230014 |          |           |
| HGNC:27386 | LINC00710 | 10p14       |                       | 254312    | ENSG00000229240 |          | NR_015413 |
| HGNC:50281 | LINC00824 | 8q24.21     | BC009730              | 101927774 | ENSG00000254275 |          |           |
| HGNC:44915 | LINC00836 | 10p12.1     | W37259, BX100192      | 101929052 |                 |          | NR_108067 |
| HGNC:27436 | LINC00837 | 10p12.1     |                       | 100507605 | ENSG00000235824 |          | NR_038374 |
| HGNC:44963 | LINC00838 | 10p11.22    | BC042457              | 100505583 | ENSG00000261683 |          | NR_038932 |
| HGNC:28269 | LINC00839 | 10q11.21    |                       | 84856     | ENSG00000185904 | 12477932 | NR_026827 |
| HGNC:44987 | LINC00840 | 10q11.21    |                       | 100506835 | ENSG00000226808 |          | NR_038268 |
| HGNC:27430 | LINC00841 | 10q11.21    | AK093142              | 283033    | ENSG00000233395 |          |           |
| HGNC:44989 | LINC00842 | 10q11.22    |                       | 643650    |                 |          | NR_033957 |
| HGNC:45009 | LINC00843 | 10q11.23    | BC035067              | 102902672 | ENSG00000178440 |          |           |
| HGNC:45031 | LINC00844 | 10q21.1     | BG618474, AB060916,   | 100507008 | ENSG00000237949 |          |           |
| HGNC:45033 | LINC00845 | 10q21.2     | BX105353, AI792470    | 100507058 | ENSG00000227244 |          |           |
| HGNC:45050 | LINC00847 | 5q35.3      | AK095170              | 729678    | ENSG00000245060 |          | NR_027183 |
| HGNC:45092 | LINC00850 | Xq28        | JX283354              |           |                 | 23223008 |           |
| HGNC:43424 | LINC00851 | 20p11.23    |                       | 440757    | ENSG00000237282 |          | NR_034167 |
| HGNC:29904 | LINC00852 | 3p25.3      | AF280797              | 84657     | ENSG00000231177 | 12477932 |           |
| HGNC:43716 | LINC00853 | 1p33        | AI792909              | 100874253 | ENSG00000224805 | 20887892 |           |
| HGNC:43658 | LINC00854 | 17q21.31    |                       | 100874261 | ENSG00000236383 | 22196729 |           |
| HGNC:45111 | LINC00856 | 10q22.3     |                       | 100132987 | ENSG00000230417 |          | NR_038985 |
| HGNC:45114 | LINC00857 | 10q22.3     |                       | 439990    | ENSG00000237523 |          | NR_038464 |
| HGNC:27276 | LINC00858 | 10q23.1     |                       | 170425    | ENSG00000229404 |          | NR_038220 |
| HGNC:45133 | LINC00861 | 8q24.13     |                       | 100130231 | ENSG00000245164 |          | NR_038446 |
| HGNC:21901 | LINC00862 | 1q32.1      | BC040731              | 554279    | ENSG00000203721 |          | NR_040064 |
| HGNC:45162 | LINC00863 | 10q23.2     | BC082979              | 677759    | ENSG00000224914 |          |           |
| HGNC:45163 | LINC00864 | 10q23.2     |                       | 728218    | ENSG00000228055 |          | NR_046091 |
| HGNC:45170 | LINC00865 | 10q23.31    |                       | 643529    | ENSG00000232229 |          | NR_038382 |
| HGNC:45232 | LINC00866 | 10q24.2     | BM126639, CK818728,   | 100505561 | ENSG00000227356 |          |           |
| HGNC:45265 | LINC00867 | 10q26.11    | AI733769, AA121564    | 100506126 | ENSG00000232139 |          |           |
| HGNC:27562 | LINC00868 | 17q25.2     | BC038218              | 283994    | ENSG00000267535 | 12477932 |           |
| HGNC:29050 | LINC00869 | 1q21.1      | AB007962              | 57234     | ENSG00000277147 | 9455484  | NR_046135 |
| HGNC:27319 | LINC00870 | 3p13        |                       | 201617    | ENSG00000243083 |          | NR_038221 |
| HGNC:47038 | LINC00871 | 14q21.2     | BG186771              |           | ENSG00000258700 |          |           |



|            |           |          |                     |           |                 |          |           |
|------------|-----------|----------|---------------------|-----------|-----------------|----------|-----------|
| HGNC:27706 | LINC00877 | 3p13     | AK097190            | 285286    | ENSG00000241163 |          |           |
| HGNC:48566 | LINC00879 | 3q11.2   |                     | 255025    | ENSG00000239589 |          |           |
| HGNC:27948 | LINC00880 | 3q25.31  | BC038760, BC040669  | 339894    | ENSG00000243629 | 12477932 |           |
| HGNC:48567 | LINC00881 | 3q25.31  |                     | 100498859 | ENSG00000241135 |          | NR_034008 |
| HGNC:48568 | LINC00882 | 3q13.12  |                     | 100302640 | ENSG00000242759 | 24886442 |           |
| HGNC:48570 | LINC00884 | 3q29     |                     | 401106    | ENSG00000233058 |          |           |
| HGNC:48571 | LINC00885 | 3q29     |                     | 401109    | ENSG00000224652 |          |           |
| HGNC:48572 | LINC00886 | 3q25.31  |                     | 730091    | ENSG00000240875 |          |           |
| HGNC:48574 | LINC00887 | 3q29     |                     | 100131551 | ENSG00000214145 | 26400545 |           |
| HGNC:48575 | LINC00888 | 3q27.1   | AK057000            | 100505687 | ENSG00000240024 |          | NR_038301 |
| HGNC:26410 | LINC00889 | Xq26.3   | AK055234, DA392242  | 158696    |                 |          |           |
| HGNC:48576 | LINC00890 | Xq23     |                     | 401613    | ENSG00000260802 |          |           |
| HGNC:48577 | LINC00891 | Xq13.1   | BX276092            | 441501    |                 |          |           |
| HGNC:48578 | LINC00892 | Xq26.3   |                     | 100128420 | ENSG00000233093 |          |           |
| HGNC:44265 | LINC00893 | Xq28     | AK124040, AF050144  | 100131434 | ENSG00000241769 | 10737977 | NR_027455 |
| HGNC:48579 | LINC00894 | Xq28     |                     | 100272228 | ENSG00000235703 |          |           |
| HGNC:48580 | LINC00895 | 22q11.21 | AK057431, BC104250  | 150185    |                 |          |           |
| HGNC:26519 | LINC00896 | 22q11.21 | AK057137            | 150197    |                 |          |           |
| HGNC:48581 | LINC00898 | 22q13.31 |                     | 400932    | ENSG00000205634 |          |           |
| HGNC:48583 | LINC00899 | 22q13.31 |                     | 100271722 | ENSG00000231711 |          |           |
| HGNC:27444 | LINC00900 | 11q23.3  |                     | 283143    | ENSG00000246100 |          |           |
| HGNC:40352 | LINC00901 | 3q13.31  | BI464214, BC040587  | 100506724 | ENSG00000242385 | 25435812 |           |
| HGNC:40351 | LINC00903 | 3q13.31  | DB446734            |           | ENSG00000241397 |          |           |
| HGNC:44325 | LINC00904 | 19q13.11 | BX091932            | 100652909 |                 |          | NR_046222 |
| HGNC:26334 | LINC00905 | 19p13.12 | BC031284, BC069223, | 148231    | ENSG00000167459 |          | NR_024335 |
| HGNC:27121 | LINC00906 | 19q12    | BX647231, BC039341  | 148145    | ENSG00000267339 |          | NR_027318 |
| HGNC:44327 | LINC00907 | 18q12.3  | BC021928, BC040725, | 284260    | ENSG00000267586 |          | NR_046174 |
| HGNC:27599 | LINC00908 | 18q23    | AK093936, BC035336, | 284276    | ENSG00000263812 |          | NR_015417 |
| HGNC:44331 | LINC00909 | 18q22.3  |                     | 400657    | ENSG00000264247 |          |           |
| HGNC:44361 | LINC00910 | 17q21.31 | BC035366            | 100130581 | ENSG00000188825 |          | NR_027412 |
| HGNC:48596 | LINC00911 | 14q31.3  | AA905171, AK131026  | 100996280 | ENSG00000259107 |          | NR_102737 |
| HGNC:48604 | LINC00914 | 6p21.33  | HF678991            |           |                 |          |           |
| HGNC:48607 | LINC00917 | 16q24.1  |                     | 732275    | ENSG00000168367 |          |           |
| HGNC:48610 | LINC00919 | 16q12.1  | AK098676            | 100505619 | ENSG00000260268 |          | NR_038233 |
| HGNC:48611 | LINC00920 | 16q21    | AW015153, DA813001  | 100505865 | ENSG00000246898 |          | NR_046242 |
| HGNC:26830 | LINC00921 | 16p13.3  | AK096958, DA532447  | 283876    |                 |          | NR_033904 |
| HGNC:27545 | LINC00922 | 16q21    | BC037902, BC104446  | 283867    | ENSG00000261742 |          | NR_027755 |
| HGNC:28088 | LINC00923 | 15q26.2  | AK025311, BC105717  | 91948     | ENSG00000251209 |          | NR_024172 |
| HGNC:27081 | LINC00924 | 15q26.2  |                     | 145820    | ENSG00000259134 |          |           |
| HGNC:27514 | LINC00926 | 15q21.3  |                     | 283663    | ENSG00000247982 |          |           |
| HGNC:27522 | LINC00927 | 15q25.1  |                     | 283688    | ENSG00000259361 |          |           |
| HGNC:27535 | LINC00928 | 15q26.1  |                     | 283761    | ENSG00000259218 |          |           |
| HGNC:48615 | LINC00929 | 15q12    |                     | 503519    | ENSG00000259150 |          |           |
| HGNC:48620 | LINC00930 | 15q26.1  |                     | 100144604 | ENSG00000258647 |          |           |
| HGNC:48625 | LINC00933 | 15q25.2  |                     | 100506874 | ENSG00000259728 |          |           |
| HGNC:27059 | LINC00934 | 12q24.23 | AK057497            | 144742    |                 |          |           |
| HGNC:48628 | LINC00935 | 12q13.12 | AK131005, BC054859  | 255411    | ENSG00000257987 |          |           |
| HGNC:27883 | LINC00936 | 12q21.33 |                     | 338758    |                 | 12477932 | NR_028138 |
| HGNC:48629 | LINC00937 | 12p13.31 | BC073935            | 389634    | ENSG00000226091 |          |           |
| HGNC:48630 | LINC00938 | 12q12    |                     | 400027    |                 |          | NR_028408 |
| HGNC:48631 | LINC00939 | 12q24.32 |                     | 400084    | ENSG00000249267 |          |           |
| HGNC:48634 | LINC00940 | 12p13.33 | AK316036, DA269488  | 100271702 | ENSG00000235049 |          |           |
| HGNC:48635 | LINC00941 | 12p11.21 | AK289874, BC072678  | 100287314 | ENSG00000235884 |          |           |
| HGNC:48636 | LINC00942 | 12p13.33 | AK090616, BG332174, | 100292680 | ENSG00000249628 |          |           |

|            |           |          |                    |           |                 |                    |           |
|------------|-----------|----------|--------------------|-----------|-----------------|--------------------|-----------|
| HGNC:48639 | LINC00943 | 12q24.32 |                    | 100507206 | ENSG00000189238 |                    |           |
| HGNC:48640 | LINC00944 | 12q24.32 | BC040060, DA048939 | 387895    | ENSG00000256128 |                    |           |
| HGNC:48643 | LINC00945 | 21q22.11 | BF204217           |           | ENSG00000232539 |                    |           |
| HGNC:28098 | LINC00950 | 9p13.3   | AF370382           | 92973     |                 | 8619474, 9110174   |           |
| HGNC:48662 | LINC00951 | 6p21.2   | AK123643, BC132805 | 401260    | ENSG00000204092 | 23872665           |           |
| HGNC:48668 | LINC00954 | 2p24.1   | BC068572, DB155534 | 400946    | ENSG00000228784 |                    | NR_033875 |
| HGNC:26644 | LINC00955 | 4p16.3   | AK092743           | 285492    | ENSG00000216560 |                    |           |
| HGNC:22332 | LINC00957 | 7p13     | BC014556           | 255031    | ENSG00000235314 |                    |           |
| HGNC:48671 | LINC00958 | 11p15.2  | AK001432           | 100506305 | ENSG00000251381 |                    |           |
| HGNC:48677 | LINC00959 | 10q26.3  |                    | 387723    | ENSG00000237489 |                    |           |
| HGNC:48710 | LINC00960 | 3p12.3   |                    | 401074    | ENSG00000242516 |                    |           |
| HGNC:27244 | LINC00961 | 9p13.3   |                    | 158376    | ENSG00000235387 |                    |           |
| HGNC:48716 | LINC00963 | 9q34.11  |                    | 100506190 | ENSG00000204054 | 24691949           |           |
| HGNC:27226 | LINC00964 | 8q24.13  |                    | 157381    | ENSG00000249816 | 12477932           |           |
| HGNC:28022 | LINC00965 | 8p23.1   |                    | 349196    |                 |                    |           |
| HGNC:48725 | LINC00967 | 8q13.1   |                    | 100505659 | ENSG00000253138 |                    |           |
| HGNC:48727 | LINC00968 | 8q12.1   |                    | 100507632 | ENSG00000246430 |                    |           |
| HGNC:48729 | LINC00969 | 3q29     | AK128346           |           | ENSG00000242086 |                    |           |
| HGNC:48730 | LINC00970 | 1q24.2   | BC041008           |           | ENSG00000203601 | 23741487           |           |
| HGNC:48737 | LINC00971 | 3p12.1   |                    | 440970    | ENSG00000242641 |                    |           |
| HGNC:48826 | LINC00972 | 7q21.11  | BG220912           | 105375380 | ENSG00000225128 |                    |           |
| HGNC:48868 | LINC00973 | 3q12.1   |                    | 100506377 | ENSG00000240476 |                    |           |
| HGNC:27105 | LINC00974 | 17q21.2  |                    | 147093    | ENSG00000226629 | 25476897           |           |
| HGNC:50610 | LINC00976 | 8q24.21  | BF691581, BF691786 |           |                 |                    |           |
| HGNC:48902 | LINC00977 | 8q24.21  |                    | 728724    | ENSG00000250400 |                    |           |
| HGNC:48664 | LINC00982 | 1p36.32  |                    | 440556    | ENSG00000177133 | 23801869, 26334618 |           |
| HGNC:48911 | LINC00987 | 12p13.31 | AK126248           | 100499405 | ENSG00000237248 |                    |           |
| HGNC:48918 | LINC00989 | 4q21.21  | BC047610           | 100506035 | ENSG00000250334 |                    |           |
| HGNC:48943 | LINC00992 | 5q23.1   | BC045192           | 728342    | ENSG00000248663 |                    |           |
| HGNC:48948 | LINC00993 | 10p11.21 | H39762             | 101929520 | ENSG00000235687 |                    |           |
| HGNC:48949 | LINC00994 | 3p14.1   |                    | 100287879 | ENSG00000189196 |                    |           |
| HGNC:27800 | LINC00996 | 7q36.1   |                    | 285972    | ENSG00000242258 | 12477932           |           |
| HGNC:48952 | LINC00997 | 7p14.3   | AK127989           | 401321    |                 |                    | NR_036501 |
| HGNC:48953 | LINC00998 | 7q31.1   | BC107860           | 401397    | ENSG00000214194 |                    |           |
| HGNC:38537 | LINC00999 | 10p11.1  | AK128746           | 399744    |                 |                    | NR_024497 |
| HGNC:38541 | LINC01000 | 7q32.1   |                    | 402483    |                 |                    | NR_024368 |
| HGNC:38540 | LINC01001 | 11p15.5  |                    | 100133161 | ENSG00000230724 |                    | NR_028326 |
| HGNC:38538 | LINC01002 | 19p13.3  |                    | 399844    | ENSG00000282508 |                    | NR_028324 |
| HGNC:48957 | LINC01003 | 7q36.1   | BC036622           | 100128822 | ENSG00000261455 |                    |           |
| HGNC:48961 | LINC01004 | 7q22.3   |                    | 100216546 | ENSG00000228393 |                    |           |
| HGNC:48963 | LINC01005 | 7q11.21  |                    | 100506050 | ENSG00000228564 |                    |           |
| HGNC:48971 | LINC01006 | 7q36.3   |                    | 100506380 | ENSG00000182648 |                    |           |
| HGNC:48973 | LINC01007 | 7q22.1   |                    | 100506527 | ENSG00000233123 |                    |           |
| HGNC:48978 | LINC01010 | 6q23.2   |                    | 154092    | ENSG00000236700 |                    |           |
| HGNC:33812 | LINC01011 | 6p25.2   |                    | 401232    | ENSG00000244041 |                    |           |
| HGNC:48986 | LINC01012 | 6p22.1   | BC035101           | 100507173 |                 |                    |           |
| HGNC:48987 | LINC01013 | 6q23.2   |                    | 100507254 | ENSG00000228495 |                    |           |
| HGNC:41353 | LINC01014 | 3q26.32  | BX105665           | 100874330 | ENSG00000223941 |                    |           |
| HGNC:48988 | LINC01015 | 6p22.1   |                    | 100507362 | ENSG00000224582 |                    |           |
| HGNC:48991 | LINC01016 | 6p21.31  |                    | 100507584 | ENSG00000249346 | 26426411           |           |
| HGNC:50641 | LINC01017 | 5p15.33  | BQ428982           | 102467075 | ENSG00000250716 |                    |           |
| HGNC:27394 | LINC01018 | 5p15.31  |                    | 255167    | ENSG00000250056 | 12477932           |           |
| HGNC:27742 | LINC01019 | 5p15.33  |                    | 285577    | ENSG00000248118 | 12477932           |           |
| HGNC:27968 | LINC01020 | 5p15.32  |                    | 340094    | ENSG00000215231 | 12477932           |           |

|            |           |          |                    |           |                 |          |           |
|------------|-----------|----------|--------------------|-----------|-----------------|----------|-----------|
| HGNC:48995 | LINC01021 | 5p14.1   |                    | 643401    | ENSG00000250337 |          |           |
| HGNC:48998 | LINC01022 | 7q36.3   | DB518621           |           | ENSG00000232715 |          |           |
| HGNC:49004 | LINC01023 | 5q21.3   | BF972671           | 100652853 |                 |          | NR_046368 |
| HGNC:49009 | LINC01024 | 5q31.2   |                    | 100505636 | ENSG00000245146 | 26337085 | NR_102739 |
| HGNC:49014 | LINC01028 | 17q24.3  | BX647864           |           | ENSG00000267603 |          |           |
| HGNC:49015 | LINC01029 | 18q23    | BC016792, BF183892 |           | ENSG00000265843 |          |           |
| HGNC:49016 | LINC01030 | 8q21.3   | BU568440           |           | ENSG00000253799 |          |           |
| HGNC:49017 | LINC01031 | 1q31.2   | BX100123           |           | ENSG00000232077 |          |           |
| HGNC:49018 | LINC01032 | 1q31.2   | AW104394           |           | ENSG00000234871 |          |           |
| HGNC:49019 | LINC01033 | 5q11.2   | BG181707           |           | ENSG00000249069 |          |           |
| HGNC:49021 | LINC01034 | 13q22.2  | BG183202           |           | ENSG00000224933 |          |           |
| HGNC:49022 | LINC01035 | 1q31.1   | BQ212312           |           | ENSG00000226486 |          |           |
| HGNC:49024 | LINC01036 | 1q31.1   | BU171718           |           | ENSG00000236030 |          |           |
| HGNC:49025 | LINC01037 | 1q31.1   | BG182723           |           | ENSG00000231599 |          |           |
| HGNC:49026 | LINC01038 | 13q31.1  | AI799053           |           | ENSG00000229011 |          |           |
| HGNC:49027 | LINC01039 | 13q32.3  | BI464824           |           | ENSG00000234168 |          |           |
| HGNC:49028 | LINC01040 | 13q31.3  | BG192883           |           | ENSG00000226037 |          |           |
| HGNC:49031 | LINC01043 | 13q34    | BX649107           |           | ENSG00000260343 |          |           |
| HGNC:49032 | LINC01044 | 13q34    | BG722997           |           | ENSG00000223626 |          |           |
| HGNC:49040 | LINC01046 | 13q12.11 | AW117237           |           | ENSG00000233405 |          |           |
| HGNC:49041 | LINC01047 | 13q31.2  | BG183515           |           | ENSG00000232225 |          |           |
| HGNC:49042 | LINC01048 | 13q13.3  | BX091314           |           | ENSG00000230390 |          |           |
| HGNC:49043 | LINC01049 | 13q31.3  | BI825411           | 101927224 | ENSG00000234384 |          |           |
| HGNC:49044 | LINC01050 | 13q14.11 | CD367180           |           | ENSG00000271216 |          |           |
| HGNC:49046 | LINC01052 | 13q21.32 | AA889679           |           | ENSG00000234767 |          |           |
| HGNC:49047 | LINC01053 | 13q12.13 |                    | 102723318 | ENSG00000238169 |          |           |
| HGNC:49048 | LINC01054 | 13q34    | BG460330           |           | ENSG00000229723 |          |           |
| HGNC:49049 | LINC01055 | 13q14.13 | BG431110           |           | ENSG00000235366 |          |           |
| HGNC:49050 | LINC01056 | 20q13.33 | BC038718           | 100144597 | ENSG00000237119 |          |           |
| HGNC:49057 | LINC01057 | 1p21.3   | BC030750           | 101928079 | ENSG00000224081 |          |           |
| HGNC:49061 | LINC01058 | 13q12.3  | CF138692           |           | ENSG00000225039 |          |           |
| HGNC:49074 | LINC01059 | 11q24.1  | CR617890, CV373778 |           | ENSG00000255414 |          |           |
| HGNC:49081 | LINC01060 | 4q35.2   |                    | 401164    | ENSG00000249378 |          |           |
| HGNC:49084 | LINC01061 | 4q26     |                    | 401149    |                 |          |           |
| HGNC:49092 | LINC01063 | 3q29     |                    | 101929769 | ENSG00000232065 |          |           |
| HGNC:49103 | LINC01065 | 13q14.3  | AW303400           |           | ENSG00000237092 |          |           |
| HGNC:49104 | LINC01066 | 13q12.3  | AA644401           |           | ENSG00000230403 |          |           |
| HGNC:49105 | LINC01067 | 13q33.3  | BF969615           |           | ENSG00000236053 |          |           |
| HGNC:49106 | LINC01068 | 13q31.1  | AI138787           |           | ENSG00000227676 |          |           |
| HGNC:49109 | LINC01069 | 13q22.3  | BI825933           | 101927176 | ENSG00000236133 |          |           |
| HGNC:49110 | LINC01070 | 13q34    | CR627049           | 101928698 | ENSG00000260102 |          |           |
| HGNC:49112 | LINC01072 | 13q12.11 | AI150015           |           | ENSG00000236076 |          |           |
| HGNC:49114 | LINC01073 | 13q13.1  | DR731308           |           | ENSG00000235822 |          |           |
| HGNC:49117 | LINC01074 | 13q21.31 | BF057195           |           | ENSG00000227611 |          |           |
| HGNC:49118 | LINC01075 | 13q21.31 | AI028357           |           | ENSG00000230142 |          |           |
| HGNC:49119 | LINC01076 | 13q12.13 | BG190398           |           | ENSG00000225105 |          |           |
| HGNC:49120 | LINC01077 | 13q14.2  | AI769787           |           | ENSG00000233456 |          |           |
| HGNC:49121 | LINC01078 | 13q22.2  | AA442466           |           | ENSG00000223880 |          |           |
| HGNC:49122 | LINC01079 | 13q12.2  | BM503984           |           | ENSG00000229609 |          |           |
| HGNC:49123 | LINC01080 | 13q31.1  | DA225206           | 101515984 |                 | 25019275 | NR_104138 |
| HGNC:49124 | LINC01081 | 16q24.1  | CR737045, HY035025 | 101154687 |                 | 24842713 | NR_104139 |
| HGNC:49125 | LINC01082 | 16q24.1  | AA399680, AI676062 | 100506542 | ENSG00000269186 |          | NR_103859 |
| HGNC:27198 | LINC01085 | 4p15.33  | AK055518           | 152742    | ENSG00000248698 |          |           |
| HGNC:49144 | LINC01087 | 2q21.1   | BC036114           | 101927994 | ENSG00000224559 |          |           |

|            |           |          |                    |           |                 |          |           |
|------------|-----------|----------|--------------------|-----------|-----------------|----------|-----------|
| HGNC:49148 | LINC01088 | 4q21.21  |                    | 100505875 | ENSG00000249307 |          |           |
| HGNC:27886 | LINC01089 | 12q24.31 | BC038786           | 338799    | ENSG00000212694 | 26252651 | NR_002809 |
| HGNC:49201 | LINC01090 | 2q32.1   | DA863615           |           | ENSG00000231689 | 24080187 |           |
| HGNC:27721 | LINC01091 | 4q28.1   | BC053945           | 285419    | ENSG00000249464 | 12477932 |           |
| HGNC:49218 | LINC01093 | 4q35.1   |                    | 100506229 | ENSG00000249173 |          |           |
| HGNC:49219 | LINC01094 | 4q21.21  |                    | 100505702 | ENSG00000251442 |          |           |
| HGNC:49220 | LINC01095 | 4q31.22  |                    | 100505545 | ENSG00000248809 |          |           |
| HGNC:27739 | LINC01096 | 4p15.33  |                    | 285548    | ENSG00000246095 | 12477932 |           |
| HGNC:27738 | LINC01097 | 4p15.33  | BC035722           | 285547    |                 |          | NR_034054 |
| HGNC:27731 | LINC01098 | 4q34.3   | BC033326           | 285501    | ENSG00000231171 |          | NR_028342 |
| HGNC:49222 | LINC01099 | 4q34.3   | BU071468           | 101928656 | ENSG00000251504 |          |           |
| HGNC:49224 | LINC01100 | 3q25.33  |                    | 730109    | ENSG00000242107 |          |           |
| HGNC:25923 | LINC01101 | 2q14.2   | AK027722           | 84931     | ENSG00000280409 |          | NR_027181 |
| HGNC:27165 | LINC01102 | 2q12.1   |                    | 150568    | ENSG00000235597 |          |           |
| HGNC:49225 | LINC01103 | 2q12.1   |                    | 101927360 | ENSG00000234781 |          |           |
| HGNC:49226 | LINC01104 | 2q11.2   |                    | 150577    | ENSG00000232084 |          |           |
| HGNC:26403 | LINC01105 | 2p25.2   |                    | 150622    | ENSG00000232044 | 25392693 |           |
| HGNC:26769 | LINC01106 | 2q13     |                    | 151009    | ENSG00000175772 |          |           |
| HGNC:49229 | LINC01107 | 2q37.3   |                    | 151171    | ENSG00000225493 |          |           |
| HGNC:49234 | LINC01108 | 6p23     | AK056826           |           | ENSG00000226673 | 22193719 |           |
| HGNC:49235 | LINC01109 | 8q21.11  | AK124684           |           | ENSG00000271167 |          |           |
| HGNC:49237 | LINC01111 | 8q21.11  |                    | 101926978 | ENSG00000254300 |          |           |
| HGNC:49245 | LINC01114 | 2q12.1   |                    | 284998    | ENSG00000234177 |          |           |
| HGNC:49258 | LINC01115 | 2p25.3   |                    | 339822    | ENSG00000237667 |          |           |
| HGNC:49259 | LINC01116 | 2q31.1   |                    | 375295    | ENSG00000163364 |          |           |
| HGNC:49260 | LINC01117 | 2q31.1   |                    |           | ENSG00000224577 |          |           |
| HGNC:49261 | LINC01118 | 2p21     |                    | 388948    | ENSG00000222005 |          |           |
| HGNC:49262 | LINC01119 | 2p21     |                    | 100134259 | ENSG00000239332 |          |           |
| HGNC:49265 | LINC01120 | 2q21.1   |                    | 389043    | ENSG00000223631 |          |           |
| HGNC:49266 | LINC01121 | 2p21     |                    | 400952    | ENSG00000205054 |          |           |
| HGNC:49267 | LINC01122 | 2p16.1   |                    | 400955    | ENSG00000233723 | 25959816 | NR_033873 |
| HGNC:49269 | LINC01123 | 2q13     |                    | 440894    | ENSG00000204588 |          |           |
| HGNC:49270 | LINC01124 | 2q31.1   |                    | 440925    | ENSG00000222033 |          |           |
| HGNC:49272 | LINC01125 | 2q11.2   |                    | 728537    | ENSG00000228486 |          |           |
| HGNC:49275 | LINC01126 | 2p21     | BC032412, CR738297 | 100129726 |                 |          |           |
| HGNC:49292 | LINC01127 | 2q11.2   | DB124570, DB153872 | 100506328 |                 |          |           |
| HGNC:49377 | LINC01128 | 1p36.33  |                    | 643837    | ENSG00000228794 |          |           |
| HGNC:49444 | LINC01132 | 1q42.3   | AK125357           | 100506810 | ENSG00000227630 |          |           |
| HGNC:49447 | LINC01133 | 1q23.2   |                    | 100505633 | ENSG00000224259 | 25908174 | NR_038849 |
| HGNC:49449 | LINC01134 | 1p36.32  |                    | 100133612 | ENSG00000236423 |          |           |
| HGNC:49450 | LINC01135 | 1p32.1   |                    | 100131060 | ENSG00000234807 |          |           |
| HGNC:49452 | LINC01136 | 1q32.1   |                    | 730227    | ENSG00000233791 |          |           |
| HGNC:49453 | LINC01137 | 1p34.3   |                    | 728431    | ENSG00000233621 |          |           |
| HGNC:49454 | LINC01138 | 1q21.2   |                    | 388685    | ENSG00000274020 |          |           |
| HGNC:27924 | LINC01139 | 1q43     |                    | 339535    | ENSG00000215808 | 12477932 |           |
| HGNC:27922 | LINC01140 | 1p22.3   | AK123670           | 339524    | ENSG00000267272 | 12477932 |           |
| HGNC:49455 | LINC01141 | 1p36.12  |                    | 339505    | ENSG00000236963 |          |           |
| HGNC:49456 | LINC01142 | 1q24.2   |                    | 284688    | ENSG00000224286 |          |           |
| HGNC:49458 | LINC01143 | 2p13.3   | BX088774           |           | ENSG00000237751 |          |           |
| HGNC:49460 | LINC01144 | 1p34.1   | BC006119           | 400752    |                 |          |           |
| HGNC:49467 | LINC01146 | 14q31.3  |                    | 283587    | ENSG00000258867 |          |           |
| HGNC:39757 | LINC01149 | 6p21.33  |                    | 101929111 | ENSG00000230174 |          |           |
| HGNC:49469 | LINC01150 | 11p15.5  | L38282, U62668     | 101927624 | ENSG00000229671 | 8968746  |           |
| HGNC:49471 | LINC01151 | 8q24.13  | DB186869           |           | ENSG00000253819 |          |           |

|            |           |              |                    |           |                 |          |           |
|------------|-----------|--------------|--------------------|-----------|-----------------|----------|-----------|
| HGNC:16752 | LINC01152 | 17q24.3      | D43770, DB072529   |           | ENSG00000256124 | 8789441  |           |
| HGNC:49495 | LINC01153 | 10q26.12     |                    | 101927889 | ENSG00000227143 |          | XR_246197 |
| HGNC:49504 | LINC01154 | 12q13.13     | AA082317           |           | ENSG00000257477 | 24344320 |           |
| HGNC:49512 | LINC01157 | 5q13.3       |                    |           |                 | 24381249 |           |
| HGNC:49513 | LINC01158 | 2q12.1       | AK096498           | 100506421 | ENSG00000233639 | 24381249 |           |
| HGNC:49514 | LINC01159 | 2q12.1       | AK095498           |           | ENSG00000229743 | 24381249 |           |
| HGNC:49525 | LINC01160 | 1p13.2       | BG742401           | 100129269 | ENSG00000231346 |          |           |
| HGNC:49528 | LINC01162 | 7p15.3       | CN412322           |           | ENSG00000232790 |          |           |
| HGNC:49530 | LINC01163 | 10q26.2      | AK124226           | 101927381 |                 |          | XR_242761 |
| HGNC:49533 | LINC01164 | 10q26.3      |                    | 399827    |                 |          | NR_038365 |
| HGNC:49534 | LINC01165 | 10q26.3      | AK097584           | 100128830 | ENSG00000229081 |          | XR_252837 |
| HGNC:49535 | LINC01166 | 10q26.3      | AK095503           | 101927590 | ENSG00000232903 |          | XR_242766 |
| HGNC:49536 | LINC01167 | 10q26.3      | BI753673           |           | ENSG00000224758 |          |           |
| HGNC:49537 | LINC01168 | 10q26.3      |                    | 399829    | ENSG00000240707 |          | NR_046231 |
| HGNC:49541 | LINC01169 | 15q22.31     | AK096135, BC016970 | 102723165 | ENSG00000259471 |          |           |
| HGNC:49542 | LINC01170 | 5q23.2       | N72756, AA215598   |           | ENSG00000253807 |          |           |
| HGNC:49545 | LINC01173 | 2q37.1-q37.2 | BF185848           |           |                 |          |           |
| HGNC:49548 | LINC01176 | 7p14.3       | BM981427           | 100506516 |                 |          |           |
| HGNC:49549 | LINC01177 | 16p13.2      | AA725682           |           | ENSG00000261397 |          |           |
| HGNC:49556 | LINC01179 | 4q32.3       | BX648971           | 101928151 | ENSG00000249500 |          |           |
| HGNC:49558 | LINC01180 | 17q21.31     | BC043289           | 101927017 | ENSG00000266979 |          |           |
| HGNC:25533 | LINC01181 | 8q22.3       | AK001351           | 379034    | ENSG00000250929 |          |           |
| HGNC:49564 | LINC01182 | 4p15.33      | DB054622           | 101929071 | ENSG00000250634 |          |           |
| HGNC:49565 | LINC01184 | 5q23.3       | BX648677           | 644873    | ENSG00000245937 | 24036268 | NR_015360 |
| HGNC:49572 | LINC01185 | 2p16.1       | AK122786           | 400957    | ENSG00000228414 |          |           |
| HGNC:49573 | LINC01186 | Xp11.3       | BC015977           | 101927574 | ENSG00000236751 |          |           |
| HGNC:49575 | LINC01187 | 5q35.1       | AK055811           | 100507267 | ENSG00000249601 |          |           |
| HGNC:49592 | LINC01189 | 9p11.2       |                    | 643648    | ENSG00000232827 |          |           |
| HGNC:49595 | LINC01191 | 2q14.1       | AW016224           | 440900    | ENSG00000234199 | 24440876 | NR_034128 |
| HGNC:37197 | LINC01192 | 3q26.1       | BX103208           | 647107    | ENSG00000241369 | 15905330 | NR_033945 |
| HGNC:28003 | LINC01193 | 15q11.2      | BC047459           | 348120    | ENSG00000258710 | 15905330 | NR_040094 |
| HGNC:37171 | LINC01194 | 5p15.2       |                    | 404663    | ENSG00000248131 | 14871852 | NR_033383 |
| HGNC:49550 | LINC01195 | 16p13.2      | CR748468           |           | ENSG00000261075 |          |           |
| HGNC:49597 | LINC01197 | 15q26.2      | BC040875           | 400456    | ENSG00000248441 |          |           |
| HGNC:49598 | LINC01198 | 13q14.13     | BC046635           | 101929344 | ENSG00000231817 |          | NR_120426 |
| HGNC:49632 | LINC01201 | Xq26.1       | AA418797           |           | ENSG00000228659 |          |           |
| HGNC:49633 | LINC01202 | 5q34         | BI755689           |           |                 | 24463510 |           |
| HGNC:49634 | LINC01203 | Xp22.2       |                    | 100133123 | ENSG00000226985 |          |           |
| HGNC:49635 | LINC01204 | Xp11.3       |                    | 101927528 | ENSG00000229563 |          |           |
| HGNC:49636 | LINC01205 | 3q13.13      |                    | 401082    | ENSG00000228980 |          |           |
| HGNC:49637 | LINC01206 | 3q26.33      |                    | 100996490 | ENSG00000242512 |          |           |
| HGNC:49638 | LINC01207 | 4q32.3       |                    | 100505989 | ENSG00000248771 |          |           |
| HGNC:49639 | LINC01208 | 3q26.32      |                    | 100505547 | ENSG00000223715 |          |           |
| HGNC:49640 | LINC01209 | 3q26.32      | BC041880           | 101928684 | ENSG00000228308 |          |           |
| HGNC:49642 | LINC01210 | 3q22.3       |                    | 100507274 | ENSG00000239513 |          |           |
| HGNC:49648 | LINC01213 | 3q25.1       |                    | 101927992 | ENSG00000244541 |          |           |
| HGNC:49650 | LINC01214 | 3q25.1       |                    | 101928022 | ENSG00000243550 |          |           |
| HGNC:49651 | LINC01215 | 3q13.12      |                    | 101929623 | ENSG00000271856 |          |           |
| HGNC:41418 | LINC01216 | 4q24         |                    |           | ENSG00000250223 |          |           |
| HGNC:41419 | LINC01217 | 4q24         |                    |           | ENSG00000251219 |          |           |
| HGNC:41420 | LINC01218 | 4q24         |                    |           | ENSG00000251636 |          |           |
| HGNC:49653 | LINC01219 | 11p15.5      | BX092271           |           | ENSG00000232987 |          |           |
| HGNC:49664 | LINC01220 | 14q24.3      |                    | 731223    | ENSG00000259687 |          |           |
| HGNC:49671 | LINC01221 | 1q32.1       | BG613973           |           | ENSG00000235492 |          |           |

|            |           |          |                    |           |                 |          |           |
|------------|-----------|----------|--------------------|-----------|-----------------|----------|-----------|
| HGNC:49672 | LINC01222 | 1q32.1   | BC040869           |           | ENSG00000233410 |          |           |
| HGNC:49676 | LINC01224 | 19p12    |                    |           | ENSG00000269416 |          |           |
| HGNC:49677 | LINC01225 | 1p35.2   |                    | 149086    | ENSG00000260386 |          |           |
| HGNC:49678 | LINC01226 | 1p35.2   |                    | 284551    | ENSG00000223907 |          | NR_027085 |
| HGNC:49680 | LINC01227 | 16q23.2  |                    | 101928276 | ENSG00000260737 |          |           |
| HGNC:49681 | LINC01228 | 16q23.2  | BM973870           |           | ENSG00000261082 | 24493833 |           |
| HGNC:49682 | LINC01229 | 16q23.2  |                    | 101928248 | ENSG00000260876 |          | NR_104661 |
| HGNC:49686 | LINC01230 | 9p24.3   | AK055761           |           |                 | 24504737 |           |
| HGNC:49688 | LINC01231 | 9p24.2   | BC041456           | 101929247 | ENSG00000236511 |          |           |
| HGNC:49755 | LINC01232 | 13q32.3  | AK123584           | 102725509 |                 | 24522499 |           |
| HGNC:49756 | LINC01233 | 19p12    | DB454962           | 100128139 | ENSG00000269364 | 24522499 |           |
| HGNC:49757 | LINC01234 | 12q24.13 |                    | 100506465 | ENSG00000249550 | 24522499 | NR_110026 |
| HGNC:49769 | LINC01235 | 9p23     | AK123194           | 401492    | ENSG00000270547 |          | NR_033863 |
| HGNC:49793 | LINC01237 | 2q37.3   |                    | 101927289 | ENSG00000233806 |          |           |
| HGNC:49796 | LINC01239 | 9p21.3   | AK092601, AA205910 | 441389    | ENSG00000234840 |          | NR_038977 |
| HGNC:49804 | LINC01241 | 9p21.2   | BC043546           | 101929582 |                 |          |           |
| HGNC:49810 | LINC01242 | 9p21.1   |                    | 401497    |                 |          | NR_046204 |
| HGNC:49814 | LINC01243 | 9p21.1   | BC040892           | 101929620 | ENSG00000260720 |          |           |
| HGNC:49840 | LINC01246 | 2p25.2   | BX096693           | 102800315 |                 |          | NR_110498 |
| HGNC:49841 | LINC01247 | 2p25.2   |                    | 101929390 | ENSG00000227007 |          | NR_110251 |
| HGNC:49842 | LINC01248 | 2p25.2   | BX111928           | 102723818 | ENSG00000224128 |          |           |
| HGNC:49843 | LINC01249 | 2p25.2   | AK307324, BC047589 | 727982    | ENSG00000231532 |          | NR_034134 |
| HGNC:49844 | LINC01250 | 2p25.3   | AK095310           | 101927554 | ENSG00000234423 |          |           |
| HGNC:49845 | LINC01251 | 9p13.3   | BX115224           | 101929688 | ENSG00000233776 |          | NR_109755 |
| HGNC:27888 | LINC01252 | 12p13.2  |                    | 338817    | ENSG00000247157 | 12477932 |           |
| HGNC:49870 | LINC01254 | 18p11.22 |                    | 101927350 | ENSG00000260913 |          |           |
| HGNC:49871 | LINC01255 | 18p11.21 |                    | 101927433 | ENSG00000267252 |          |           |
| HGNC:49895 | LINC01256 | 4q28.3   | BX088800           |           | ENSG00000251398 |          |           |
| HGNC:26972 | LINC01257 | 12q24.33 | BC112214           | 116437    | ENSG00000204603 |          |           |
| HGNC:49898 | LINC01258 | 4p14     |                    | 101928776 | ENSG00000249534 |          |           |
| HGNC:49899 | LINC01259 | 4p14     | CR984336           |           | ENSG00000249667 |          |           |
| HGNC:49900 | LINC01260 | 20q13.12 | BC000849           | 79015     | ENSG00000132832 |          |           |
| HGNC:50275 | LINC01262 | 4q35.2   | BC092460           | 101928971 | ENSG00000250739 | 24651478 |           |
| HGNC:50282 | LINC01264 | 10q11.21 | BE644626           |           | ENSG00000229630 | 24672800 |           |
| HGNC:50297 | LINC01265 | 5p13.1   |                    | 101926904 | ENSG00000249911 |          |           |
| HGNC:50309 | LINC01266 | 3p26.3   |                    | 101927215 | ENSG00000224957 |          |           |
| HGNC:50320 | LINC01267 | 3p25.1   |                    | 101927565 | ENSG00000251576 |          |           |
| HGNC:50323 | LINC01268 | 6q21     | BC037331           | 285758    | ENSG00000227502 | 24821221 |           |
| HGNC:50325 | LINC01269 | 14q24.2  | DA437066           |           | ENSG00000258689 |          |           |
| HGNC:27658 | LINC01270 | 20q13.13 | AK090605           | 284751    | ENSG00000203999 |          |           |
| HGNC:50327 | LINC01271 | 20q13.13 |                    | 101927586 | ENSG00000233077 |          |           |
| HGNC:50328 | LINC01272 | 20q13.13 |                    | 100506115 | ENSG00000224397 |          |           |
| HGNC:50329 | LINC01273 | 20q13.13 |                    | 101927541 | ENSG00000231742 |          |           |
| HGNC:50333 | LINC01276 | 6p21.1   | DQ141194           |           | ENSG00000226917 |          |           |
| HGNC:50334 | LINC01277 | 6q24.2   |                    | 100507489 | ENSG00000229017 |          |           |
| HGNC:28090 | LINC01278 | Xq11.1   |                    | 92249     | ENSG00000235437 |          |           |
| HGNC:50335 | LINC01279 | 3q13.2   | AK126393           | 100506621 | ENSG00000272761 |          |           |
| HGNC:50336 | LINC01280 | 2q35     | AK307257           | 101928232 | ENSG00000224391 |          |           |
| HGNC:50337 | LINC01281 | Xp11.4   |                    | 286442    | ENSG00000235304 |          |           |
| HGNC:50338 | LINC01282 | Xp11.4   | BC043536           | 101927449 | ENSG00000236747 |          |           |
| HGNC:50342 | LINC01284 | Xp11.22  |                    | 101926971 | ENSG00000230317 |          |           |
| HGNC:50344 | LINC01285 | Xq24     |                    | 101928287 | ENSG00000203650 |          | NR_110393 |
| HGNC:50351 | LINC01287 | 7q36.2   | BF514057           |           | ENSG00000234722 |          |           |
| HGNC:50353 | LINC01288 | 8p12     | DB066514           |           | ENSG00000254344 |          |           |

|            |           |          |                    |           |                 |          |           |
|------------|-----------|----------|--------------------|-----------|-----------------|----------|-----------|
| HGNC:50354 | LINC01289 | 8q12.3   | BC037345           | 286184    | ENSG00000253734 |          |           |
| HGNC:50356 | LINC01290 | 16p13.13 | BF853722, BI010826 |           | ENSG00000260468 |          |           |
| HGNC:50358 | LINC01291 | 2p12     | CV382059           |           | ENSG00000204792 |          |           |
| HGNC:50362 | LINC01293 | 2p12     |                    | 101927861 | ENSG00000230836 |          |           |
| HGNC:48904 | LINC01296 | 14q11.2  | BC041856           | 642477    | ENSG00000244306 | 25894381 |           |
| HGNC:50443 | LINC01297 | 14q11.2  | BF001177           |           | ENSG00000274827 |          |           |
| HGNC:32292 | LINC01298 | 8q22.1   | AA469917           | 619344    | ENSG00000253351 |          | NR_046232 |
| HGNC:27839 | LINC01299 | 8q13.1   | AK094960           | 286186    | ENSG00000254081 |          |           |
| HGNC:50460 | LINC01300 | 8q24.3   |                    | 731779    | ENSG00000253595 |          |           |
| HGNC:50464 | LINC01301 | 8q12.1   |                    | 100505532 | ENSG00000251396 |          |           |
| HGNC:50472 | LINC01304 | 2p25.3   |                    | 100505964 | ENSG00000237401 |          |           |
| HGNC:27690 | LINC01305 | 2q31.1   |                    | 285084    | ENSG00000231453 |          |           |
| HGNC:50494 | LINC01307 | 1p21.2   | BG203915           |           | ENSG00000231671 |          |           |
| HGNC:50497 | LINC01309 | 13q33.1  | AA421210           |           | ENSG00000234551 |          |           |
| HGNC:50501 | LINC01310 | 22q13.32 | AK056844           | 100128946 | ENSG00000205632 |          |           |
| HGNC:50503 | LINC01311 | 22q11.21 |                    | 100652736 | ENSG00000260924 |          |           |
| HGNC:28525 | LINC01312 | 6q23.2   |                    | 154089    | ENSG00000223586 | 12477932 |           |
| HGNC:50507 | LINC01314 | 15q25.1  |                    | 100996492 | ENSG00000259417 |          |           |
| HGNC:50513 | LINC01315 | 22q13.2  | BC038245           | 102723775 | ENSG00000229891 |          |           |
| HGNC:50523 | LINC01317 | 2p22.3   | BQ213083           |           | ENSG00000203386 | 24833871 |           |
| HGNC:50524 | LINC01318 | 2p22.3   | DB027554           |           | ENSG00000237790 |          |           |
| HGNC:50526 | LINC01320 | 2p22.3   | BX395998, BI759570 |           | ENSG00000228262 |          |           |
| HGNC:50528 | LINC01322 | 3q26.1   | DA224933, DA156477 |           | ENSG00000244128 |          |           |
| HGNC:50529 | LINC01323 | 3q26.1   | BG192479           |           | ENSG00000241636 |          |           |
| HGNC:50530 | LINC01324 | 3q26.1   | BG221042           |           | ENSG00000241767 |          |           |
| HGNC:50532 | LINC01326 | 3q26.1   | BG190199           |           | ENSG00000244321 |          |           |
| HGNC:50533 | LINC01327 | 3q26.1   | BF059162           |           | ENSG00000241669 |          |           |
| HGNC:50536 | LINC01330 | 3q26.2   | AK093355, BC043538 | 646168    | ENSG00000244227 |          |           |
| HGNC:50538 | LINC01331 | 5q13.3   | DA145234           |           | ENSG00000248673 |          |           |
| HGNC:50540 | LINC01332 | 5q13.3   | DA178531           |           | ENSG00000250446 |          |           |
| HGNC:50539 | LINC01333 | 5q13.3   | BC043537           | 101929082 | ENSG00000249343 |          |           |
| HGNC:50542 | LINC01335 | 5q13.3   | AI018361           | 102503429 | ENSG00000248942 |          |           |
| HGNC:50543 | LINC01336 | 5q13.3   | DB344036           |           | ENSG00000250889 |          |           |
| HGNC:50546 | LINC01337 | 5q14.1   | DB525610           |           | ENSG00000251221 |          |           |
| HGNC:50547 | LINC01338 | 5q14.2   |                    | 102546175 |                 |          | NR_105016 |
| HGNC:50549 | LINC01339 | 5q14.3   | AI674738           | 101929495 | ENSG00000248555 |          |           |
| HGNC:50550 | LINC01340 | 5q15     | BQ432570           | 102546227 | ENSG00000250331 |          |           |
| HGNC:49457 | LINC01341 | 1q44     |                    | 149134    | ENSG00000227953 |          |           |
| HGNC:50551 | LINC01342 | 1p36.33  | BC028014           | 254099    | ENSG00000223823 |          |           |
| HGNC:50553 | LINC01343 | 1p34.3   | BC042675           | 339442    | ENSG00000237290 |          |           |
| HGNC:50554 | LINC01344 | 1q25.3   |                    | 400799    | ENSG00000228918 |          |           |
| HGNC:50563 | LINC01346 | 1p36.32  |                    | 728716    | ENSG00000233304 |          |           |
| HGNC:50566 | LINC01347 | 1q43     |                    | 731275    | ENSG00000214837 |          |           |
| HGNC:50567 | LINC01348 | 1q42     | AK128489           | 731656    |                 |          |           |
| HGNC:50568 | LINC01349 | 1p21.2   |                    | 100128787 | ENSG00000230402 |          |           |
| HGNC:50575 | LINC01350 | 1q25.3   |                    | 101929093 | ENSG00000228309 |          |           |
| HGNC:50577 | LINC01351 | 1q31.1   |                    | 101929120 | ENSG00000237457 |          |           |
| HGNC:50578 | LINC01352 | 1q41     |                    | 101929730 | ENSG00000238078 |          |           |
| HGNC:50580 | LINC01353 | 1q32.1   |                    | 100506775 | ENSG00000231507 |          |           |
| HGNC:50581 | LINC01354 | 1q42.2   |                    | 100506795 | ENSG00000231768 |          |           |
| HGNC:50584 | LINC01355 | 1p36.12  |                    | 100996511 | ENSG00000261326 |          |           |
| HGNC:50587 | LINC01356 | 1p13.2   |                    | 100996702 | ENSG00000215866 |          |           |
| HGNC:50589 | LINC01358 | 1p32.1   |                    | 101926925 | ENSG00000230812 |          |           |
| HGNC:50591 | LINC01359 | 1p31.3   |                    | 101927084 | ENSG00000226891 |          |           |

|            |           |          |                    |           |                 |          |           |
|------------|-----------|----------|--------------------|-----------|-----------------|----------|-----------|
| HGNC:50593 | LINC01360 | 1p31.1   |                    | 101927295 | ENSG00000233973 |          |           |
| HGNC:50595 | LINC01361 | 1p31.1   |                    | 101927498 | ENSG00000236268 |          |           |
| HGNC:50596 | LINC01362 | 1p31.1   | BC043539           |           | ENSG00000230817 |          |           |
| HGNC:50598 | LINC01363 | 1q24.1   |                    | 101928484 | ENSG00000231605 |          |           |
| HGNC:50599 | LINC01364 | 1p22.3   |                    | 100505768 | ENSG00000227290 |          |           |
| HGNC:50603 | LINC01365 | 4q26     |                    | 101927007 | ENSG00000250772 |          |           |
| HGNC:27416 | LINC01366 | 5q35.1   |                    | 257358    | ENSG00000235172 |          |           |
| HGNC:50608 | LINC01370 | 20q12    | BI792917           | 100505663 | ENSG00000237767 | 23040067 | NR_109936 |
| HGNC:50623 | LINC01372 | 7q11.21  | BC017910           | 101929736 | ENSG00000235475 |          |           |
| HGNC:50631 | LINC01374 | 10q23.31 | AI126223           |           |                 | 24876753 |           |
| HGNC:50632 | LINC01375 | 10q23.31 | AK093219           | 101926924 | ENSG00000226159 |          |           |
| HGNC:50637 | LINC01376 | 2p24.1   | AK123475           | 400945    | ENSG00000236204 |          |           |
| HGNC:50642 | LINC01377 | 5p15.33  |                    | 102467074 |                 |          |           |
| HGNC:50645 | LINC01378 | 4q26     | DB466276           |           | ENSG00000236922 |          |           |
| HGNC:50653 | LINC01381 | 2p23.3   | AW515644           |           | ENSG00000230452 |          |           |
| HGNC:50656 | LINC01384 | 20p11.21 |                    | 101929685 | ENSG00000237396 |          |           |
| HGNC:50657 | LINC01385 | 5q13.2   | DB294021           |           | ENSG00000251604 |          |           |
| HGNC:50659 | LINC01386 | 5q13.2   | AA969225           |           | ENSG00000251324 |          |           |
| HGNC:44660 | LINC01387 | 18p11.31 |                    | 100130480 | ENSG00000265944 |          |           |
| HGNC:50660 | LINC01388 | 9p24.3   | AW873619           |           | ENSG00000231808 |          |           |
| HGNC:50661 | LINC01389 | 1p33     | BX102452           |           | ENSG00000225762 |          |           |
| HGNC:50666 | LINC01391 | 3q22.3   | AK128202           |           | ENSG00000244578 |          |           |
| HGNC:50668 | LINC01392 | 7q31.2   | DA452608           |           | ENSG00000233607 |          |           |
| HGNC:50669 | LINC01393 | 7q31.2   | BC022431           |           | ENSG00000225535 |          |           |
| HGNC:50670 | LINC01394 | 6p25.3   | AI698698           |           |                 |          |           |
| HGNC:50674 | LINC01395 | 11q24.3  | BC038579           | 101929557 |                 |          |           |
| HGNC:50675 | LINC01396 | 4p16.2   | AW195733           |           | ENSG00000273396 |          |           |
| HGNC:50677 | LINC01397 | 1p13.3   | DA779101           |           | ENSG00000258673 |          |           |
| HGNC:50678 | LINC01398 | 1p33     | BC021746           | 101929651 | ENSG00000224863 |          |           |
| HGNC:50680 | LINC01399 | 22q12.3  | CB111670           |           | ENSG00000233080 |          |           |
| HGNC:50681 | LINC01400 | 9p13.2   | AL559860           |           | ENSG00000232920 |          |           |
| HGNC:50685 | LINC01402 | Xq24     | AA360663           | 104797536 | ENSG00000228139 |          | NR_126557 |
| HGNC:50688 | LINC01405 | 12q24.11 | AJ276555           | 100131138 | ENSG00000185847 |          |           |
| HGNC:50702 | LINC01410 | 9q13     | CR627148           |           | ENSG00000238113 |          |           |
| HGNC:50703 | LINC01411 | 5q35.2   | BM051440           | 101928176 | ENSG00000249306 | 25422238 | NR_125806 |
| HGNC:50704 | LINC01412 | 2q22.3   |                    | 101928455 | ENSG00000232606 |          |           |
| HGNC:50705 | LINC01413 | 15q21.3  |                    | 101928611 | ENSG00000260172 |          |           |
| HGNC:50709 | LINC01415 | 18q21.2  | AK127787           | 100132501 | ENSG00000267325 |          |           |
| HGNC:51645 | LINC01416 | 18q21.2  |                    | 101927273 | ENSG00000260930 |          | NR_110755 |
| HGNC:50712 | LINC01419 | 8q21.13  | BC038578           |           | ENSG00000253898 |          |           |
| HGNC:50713 | LINC01420 | Xp11.21  | BC048131           | 550643    | ENSG00000204272 |          |           |
| HGNC:50728 | LINC01422 | 22q12.1  |                    | 101929539 | ENSG00000223704 |          |           |
| HGNC:50732 | LINC01423 | 21q22    | AI752367, DA464432 | 102724678 | ENSG00000231231 |          |           |
| HGNC:40558 | LINC01424 | 21q22.3  |                    | 101928689 | ENSG00000236519 |          |           |
| HGNC:50733 | LINC01425 | 21q21.1  |                    | 101927821 | ENSG00000233997 |          |           |
| HGNC:50734 | LINC01426 | 21q22.12 |                    | 100506385 | ENSG00000234380 |          |           |
| HGNC:50737 | LINC01427 | 20p11.22 |                    | 101929663 | ENSG00000225321 |          |           |
| HGNC:50738 | LINC01428 | 20p12.3  |                    | 101929265 | ENSG00000228888 |          |           |
| HGNC:50741 | LINC01429 | 20q13.2  |                    | 101927678 | ENSG00000227964 |          |           |
| HGNC:50742 | LINC01430 | 20q13.12 |                    | 101927242 | ENSG00000237907 |          |           |
| HGNC:50744 | LINC01431 | 20p11.21 |                    | 100505683 | ENSG00000232645 |          |           |
| HGNC:50745 | LINC01432 | 20p11.22 |                    | 100270679 | ENSG00000234435 |          |           |
| HGNC:50746 | LINC01433 | 20p13    |                    | 728228    | ENSG00000230176 | 25820656 | NR_033917 |
| HGNC:50753 | LINC01435 | 10q25.1  | BX116650, AA406208 |           | ENSG00000229981 | 24932682 |           |



|            |           |          |                    |           |                 |          |           |
|------------|-----------|----------|--------------------|-----------|-----------------|----------|-----------|
| HGNC:50754 | LINC01436 | 21q22.12 |                    | 100996609 | ENSG00000231106 | 24932682 |           |
| HGNC:50757 | LINC01438 | 4q25     | DA725631           |           | ENSG00000249519 |          |           |
| HGNC:50762 | LINC01440 | 20q13.2  | BX107747           | 102723578 | ENSG00000235166 |          |           |
| HGNC:50763 | LINC01441 | 20q13.2  |                    | 101927796 | ENSG00000224008 |          |           |
| HGNC:50764 | LINC01442 | 13q21.2  | AK097816, AA393276 |           | ENSG00000227510 |          |           |
| HGNC:50768 | LINC01443 | 18p11.21 |                    | 400644    | ENSG00000266554 |          |           |
| HGNC:50769 | LINC01444 | 18p11.21 |                    | 101927642 | ENSG00000264301 |          |           |
| HGNC:50771 | LINC01445 | 7p11.2   | BF966467           | 102723605 | ENSG00000231427 |          |           |
| HGNC:50773 | LINC01446 | 7p12.1   |                    | 401337    | ENSG00000205628 |          |           |
| HGNC:50783 | LINC01447 | 7p12.3   |                    | 101929086 | ENSG00000236078 |          |           |
| HGNC:50790 | LINC01448 | 7p14.1   |                    | 101928795 | ENSG00000238284 |          |           |
| HGNC:50791 | LINC01449 | 7p14.1   |                    | 101928773 | ENSG00000224017 |          |           |
| HGNC:50792 | LINC01450 | 7p14.1   |                    | 101928744 | ENSG00000232458 |          |           |
| HGNC:48599 | LINC01451 | 9q34.3   | AY129027, CA503198 | 401561    |                 |          |           |
| HGNC:50545 | LINC01455 | 5q14.1   | DB088210           |           | ENSG00000250888 |          |           |
| HGNC:50846 | LINC01456 | Xp22.13  | BE792552           |           | ENSG00000225882 |          |           |
| HGNC:50858 | LINC01460 | 2p23.2   | AK124439           | 100129995 | ENSG00000205334 |          |           |
| HGNC:50859 | LINC01461 | 1p22.3   | DA091614           |           |                 |          |           |
| HGNC:26364 | LINC01465 | 12q14.1  | AK098456           | 283416    | ENSG00000221949 |          |           |
| HGNC:50911 | LINC01467 | 14q31.1  |                    | 101928559 | ENSG00000258977 |          |           |
| HGNC:50913 | LINC01468 | 10q21.1  |                    | 101928687 | ENSG00000231131 | 25045670 |           |
| HGNC:51105 | LINC01470 | 5q33.1   |                    | 101927134 | ENSG00000249484 |          |           |
| HGNC:51106 | LINC01471 | 3q21.3   |                    | 101927149 | ENSG00000239921 |          |           |
| HGNC:51109 | LINC01473 | 2q32.1   |                    | 101927217 | ENSG00000237877 |          |           |
| HGNC:51111 | LINC01474 | 9q21.13  |                    | 101927258 | ENSG00000236849 |          |           |
| HGNC:51113 | LINC01475 | 10q24.2  |                    | 101927324 | ENSG00000257582 |          |           |
| HGNC:51117 | LINC01476 | 17q23.1  |                    | 101927728 | ENSG00000265313 |          |           |
| HGNC:51119 | LINC01477 | 18q12.3  |                    | 101927900 | ENSG00000261715 |          |           |
| HGNC:51121 | LINC01478 | 18q12.3  |                    | 101927921 | ENSG00000267337 |          |           |
| HGNC:51123 | LINC01479 | 12q15    |                    | 101927922 | ENSG00000255772 |          |           |
| HGNC:51124 | LINC01480 | 19q13.2  |                    | 101927931 | ENSG00000270164 |          |           |
| HGNC:51126 | LINC01481 | 12q15    |                    | 101928062 | ENSG00000257613 |          |           |
| HGNC:51128 | LINC01482 | 17q24.2  |                    | 101928104 | ENSG00000267659 |          |           |
| HGNC:51130 | LINC01483 | 17q24.3  |                    | 101928122 | ENSG00000227517 |          |           |
| HGNC:51136 | LINC01484 | 5q35.2   |                    | 101928136 | ENSG00000253686 |          |           |
| HGNC:51138 | LINC01485 | 5q35.2   |                    | 101928154 | ENSG00000254211 |          |           |
| HGNC:51137 | LINC01486 | 12q24.11 |                    | 101928138 | ENSG00000256560 |          |           |
| HGNC:51139 | LINC01487 | 3q25.2   |                    | 101928190 | ENSG00000241336 |          |           |
| HGNC:51144 | LINC01488 | 11q13.3  |                    | 101928292 |                 |          | NR_120542 |
| HGNC:51145 | LINC01489 | 12p12.3  |                    | 101928340 | ENSG00000255727 |          |           |
| HGNC:51146 | LINC01490 | 12q21.31 |                    | 101928420 | ENSG00000257741 |          |           |
| HGNC:51148 | LINC01491 | 15q21.1  |                    | 101928442 | ENSG00000259572 |          |           |
| HGNC:51149 | LINC01492 | 9q31.1   |                    | 101928496 | ENSG00000225564 |          |           |
| HGNC:51150 | LINC01493 | 11p12    |                    | 101928536 | ENSG00000254562 |          |           |
| HGNC:51152 | LINC01494 | 2q35     |                    | 101928537 | ENSG00000228135 |          |           |
| HGNC:51161 | LINC01495 | 11p14.3  |                    | 102723378 | ENSG00000255323 |          |           |
| HGNC:51162 | LINC01496 | Xp11.22  |                    | 102723426 | ENSG00000234766 |          |           |
| HGNC:51163 | LINC01497 | 17q24.3  |                    | 102723487 | ENSG00000237560 |          |           |
| HGNC:51164 | LINC01498 | 12q23.3  |                    | 102723562 | ENSG00000247213 |          |           |
| HGNC:51165 | LINC01499 | 11p12    |                    | 102723644 | ENSG00000255171 |          |           |
| HGNC:51166 | LINC01500 | 14q23.1  |                    | 102723742 | ENSG00000258583 |          |           |
| HGNC:27988 | LINC01501 | 9q22.2   | BC040625           | 340515    | ENSG00000229613 | 12477932 | NR_034157 |
| HGNC:51183 | LINC01502 | 9q34.3   | AK098241           | 100130954 | ENSG00000237339 |          | NR_034016 |
| HGNC:51184 | LINC01503 | 9q34.11  |                    | 100506119 | ENSG00000233901 | 25045670 | NR_120685 |

|            |           |          |                              |           |                  |                    |           |
|------------|-----------|----------|------------------------------|-----------|------------------|--------------------|-----------|
| HGNC:51185 | LINC01504 | 9q21.13  | AK095210                     | 100507540 | ENSG00000225434  |                    | NR_110952 |
| HGNC:51186 | LINC01505 | 9q31.2   | AK093363                     | 100996590 | ENSG00000234229  |                    | NR_104145 |
| HGNC:51187 | LINC01506 | 9q21.11  |                              | 101927015 | ENSG00000234506  |                    | NR_109769 |
| HGNC:51189 | LINC01507 | 9q21.31  |                              | 101927477 | ENSG00000230945  | 26328256           | NR_121212 |
| HGNC:51190 | LINC01508 | 9q22.2   |                              | 101927873 | ENSG00000231107  |                    | NR_109795 |
| HGNC:51193 | LINC01509 | 9q31.2   |                              | 101928720 | ENSG00000226825  |                    | NR_121581 |
| HGNC:51196 | LINC01510 | 7q31.2   |                              | 100996266 | ENSG00000231210  |                    |           |
| HGNC:51200 | LINC01511 | 5p15.33  | BC034612                     | 100506791 | ENSG00000250584  | 25085781           |           |
| HGNC:51201 | LINC01512 | 6p21.1   | AK095548                     | 100132354 |                  | 25089627, 23040067 | NR_024478 |
| HGNC:51202 | LINC01513 | 5p15.2   | BM975707                     |           | ENSG00000246016  | 25089627           |           |
| HGNC:51207 | LINC01514 | 10q24.31 | BC038784                     | 101927396 | ENSG00000237579  |                    | NR_120620 |
| HGNC:51210 | LINC01515 | 10q21.3  |                              | 101928913 | ENSG00000228065  |                    | NR_120647 |
| HGNC:51211 | LINC01516 | 10p12.1  | BC042983                     | 101929025 | ENSG00000231422  |                    | NR_120649 |
| HGNC:51212 | LINC01517 | 10p12.1  | HY052409                     | 101929218 | ENSG00000232624  |                    | NR_120652 |
| HGNC:51216 | LINC01518 | 10q11.21 | AK123067                     | 101929397 | ENSG00000233515  |                    | NR_120659 |
| HGNC:51217 | LINC01519 | 10q23.1  | AK097624                     | 101929624 | ENSG00000237267  |                    | NR_120667 |
| HGNC:51218 | LINC01520 | 10q23.1  | AL117638                     | 101929684 | ENSG00000230962  |                    | NR_120671 |
| HGNC:26029 | LINC01521 | 22q12.2  | BC004550                     | 54944     | ENSG00000213888  |                    | NR_120386 |
| HGNC:51224 | LINC01522 | 20q13.13 |                              | 101927457 | ENSG00000237423  |                    | NR_110027 |
| HGNC:51225 | LINC01523 | 20q13.13 |                              | 101060004 | ENSG00000229522  |                    | NR_109942 |
| HGNC:51228 | LINC01524 | 20q13.2  | CD109474, BC045652           | 101927700 | ENSG00000234948  |                    | NR_110038 |
| HGNC:51264 | LINC01525 | 1p12     | BX109912, AW590930, AA909723 |           | ENSG00000235202  | 25045670           |           |
| HGNC:51265 | LINC01526 | 6q14.1   | BC038576                     | 101928770 | ENSG00000224995  | 25045670           |           |
| HGNC:51266 | LINC01527 | 1q21.3   | BC042056                     | 101927988 | ENSG00000224308  | 25045670           | XR_241125 |
| HGNC:51268 | LINC01529 | 19q13.12 | AK055260                     | 644050    | ENSG00000225872  |                    | NR_104176 |
| HGNC:44320 | LINC01530 | 19q13.41 | AK054965, CA867516,          | 729975    |                  |                    | NR_034159 |
| HGNC:51270 | LINC01531 | 19q13.12 | AK128099                     | 100128682 | ENSG00000205786  |                    | NR_040046 |
| HGNC:51272 | LINC01532 | 19q12    | AK055100                     | 100505835 | ENSG00000267014  |                    | NR_040036 |
| HGNC:51274 | LINC01533 | 19q13.11 |                              | 100996665 | ENSG00000267779  |                    | NR_110673 |
| HGNC:51281 | LINC01534 | 19q13.12 |                              | 101927621 | ENSG00000225975  |                    | NR_110708 |
| HGNC:51282 | LINC01535 | 19q13.12 |                              | 101927667 | ENSG00000226686  |                    | NR_110720 |
| HGNC:51301 | LINC01537 | 11q13.4  | AL832797                     | 101928555 | ENSG00000227467  | 25243407           |           |
| HGNC:51306 | LINC01538 | 18q22.1  | BC042493                     | 400654    | ENSG000002266952 |                    | NR_033983 |
| HGNC:51307 | LINC01539 | 18q21.2  | AK057336, AK058169           | 100505474 | ENSG00000267712  |                    | NR_040025 |
| HGNC:51309 | LINC01541 | 18q22.3  | BX648957                     | 100505776 | ENSG00000260676  |                    | NR_038325 |
| HGNC:51310 | LINC01543 | 18q11.2  | HY185322                     | 100506787 | ENSG00000263862  |                    | NR_110762 |
| HGNC:51312 | LINC01544 | 18q21.33 | AK054836                     | 100996669 | ENSG00000260440  |                    | NR_103449 |
| HGNC:17986 | LINC01545 | Xp11.3   | BC038573                     | 724087    | ENSG00000204904  |                    | NR_046101 |
| HGNC:27336 | LINC01546 | Xp22.33  |                              | 100129464 | ENSG00000228459  |                    | NR_038428 |
| HGNC:15707 | LINC01547 | 21q22.3  | AY040088                     | 84536     | ENSG00000183250  | 11707072           | NR_027128 |
| HGNC:1296  | LINC01548 | 21q22.11 |                              | 728409    | ENSG00000229086  |                    | NR_024102 |
| HGNC:1277  | LINC01549 | 21q21.1  |                              | 100505929 | ENSG00000232560  |                    | NR_037585 |
| HGNC:20111 | LINC01550 | 14q32.2  | BC043585                     | 388011    | ENSG00000246223  |                    | NR_015430 |
| HGNC:19828 | LINC01551 | 14q11.2  |                              | 387978    | ENSG00000186960  |                    | NR_026731 |
| HGNC:23524 | LINC01553 | 10q21.3  | BC038741                     | 283025    | ENSG00000235931  | 12477932           | NR_024340 |
| HGNC:24687 | LINC01554 | 5q15     | AY168789                     | 202299    | ENSG00000236882  |                    | NR_026936 |
| HGNC:26647 | LINC01555 | 1p22.3   | AK092806                     | 439927    | ENSG00000180869  |                    | NR_027379 |
| HGNC:21195 | LINC01556 | 6p22.1   |                              | 729583    | ENSG00000204709  |                    | NR_103538 |
| HGNC:21235 | LINC01558 | 6q27     |                              | 26238     | ENSG00000146521  | 10382971           | NR_026773 |
| HGNC:26598 | LINC01559 | 12p13.1  | AK091129                     | 283422    | ENSG00000180861  |                    | NR_036555 |
| HGNC:27333 | LINC01560 | Xp11.23  | BC025179                     | 203414    | ENSG00000196741  | 12477932           | NR_126059 |
| HGNC:31365 | LINC01561 | 10q26.12 | AK094721                     | 404216    | ENSG00000177234  |                    | NR_103717 |
| HGNC:51335 | LINC01562 | 1p32.3   | AK127900                     |           | ENSG00000203356  | 25280944           |           |
| HGNC:51343 | LINC01563 | 17p11.2  | AB593144                     | 101060544 | ENSG00000236819  |                    | NR_110895 |

|            |           |              |                              |           |                 |          |           |
|------------|-----------|--------------|------------------------------|-----------|-----------------|----------|-----------|
| HGNC:51361 | LINC01564 | 6p12.1       |                              | 101927171 | ENSG00000235899 | 25307116 | NR_125841 |
| HGNC:17099 | LINC01565 | 3q21         | AF008192                     | 23434     | ENSG00000198685 | 9307271  |           |
| HGNC:27555 | LINC01566 | 16p11.1      | BC038774, BC045579           | 283914    | ENSG00000259841 |          | NR_027079 |
| HGNC:51367 | LINC01567 | 16p12.1      | AK127191                     | 400511    | ENSG00000224310 |          | NR_122072 |
| HGNC:51371 | LINC01568 | 16q22.3      | BC036646                     | 100506172 | ENSG00000258779 |          | NR_038234 |
| HGNC:51380 | LINC01569 | 16p13.3      | AK094828                     | 100507501 | ENSG00000262468 |          | NR_039999 |
| HGNC:51382 | LINC01570 | 16p13.3      | BI825594, DB449025           | 101926950 | ENSG00000260338 |          | NR_110902 |
| HGNC:51384 | LINC01571 | 16q12.1      | AI050873                     | 101927364 | ENSG00000260057 |          | NR_110916 |
| HGNC:51385 | LINC01572 | 16q22.2      |                              | 101927957 | ENSG00000261008 |          | NR_126330 |
| HGNC:51388 | LINC01574 | 5q35.2       |                              | 102577424 | ENSG00000248859 | 23040067 | NR_108030 |
| HGNC:48626 | LINC01578 | 15q26.1      |                              | 100507217 | ENSG00000272888 |          | NR_037601 |
| HGNC:27519 | LINC01579 | 15q26.1-q26. | BC037497                     | 283682    | ENSG00000258754 |          |           |
| HGNC:51414 | LINC01580 | 15q26.2      | BC021741                     | 101927129 | ENSG00000258785 |          | NR_120322 |
| HGNC:51415 | LINC01581 | 15q26.2      | BC043440                     | 101927112 | ENSG00000259724 |          | NR_120320 |
| HGNC:51416 | LINC01582 | 15q26.3      |                              | 101927332 | ENSG00000259611 |          | NR_120325 |
| HGNC:51425 | LINC01583 | 15q25.2      | BC043257                     | 101929690 | ENSG00000259518 |          | NR_120367 |
| HGNC:51426 | LINC01584 | 15q25.3      | BX116292                     | 101929701 | ENSG00000260477 |          | NR_120368 |
| HGNC:51432 | LINC01585 | 15q26.1      | BC038778                     | 101929765 | ENSG00000245479 |          | NR_120371 |
| HGNC:51434 | LINC01586 | 15q26.1      | AK054749                     | 101929743 | ENSG00000249487 |          | NR_120369 |
| HGNC:13716 | LINC01587 | 4p16         | D82070                       | 10141     | ENSG00000082929 | 9016955  | NR_126517 |
| HGNC:27503 | LINC01588 | 14q22.1      | AK090420                     | 283551    | ENSG00000214900 |          | NR_126496 |
| HGNC:51520 | LINC01589 | 22q13.31     | BC045163                     | 100506737 | ENSG00000238120 | 25482444 |           |
| HGNC:21404 | LINC01590 | 6q15-q16.1   | AK021476                     | 63914     |                 |          | NR_026784 |
| HGNC:27819 | LINC01591 | 8q24.22      |                              | 286094    | ENSG00000254083 | 12477932 | NR_026706 |
| HGNC:51557 | LINC01592 | 8q13.2       |                              | 100505718 | ENSG00000253658 |          | NR_039986 |
| HGNC:51583 | LINC01593 | 2q12.3       |                              |           | ENSG00000231221 |          |           |
| HGNC:51584 | LINC01594 | 2q12.3       | CR748429                     | 102724774 | ENSG00000225328 |          |           |
| HGNC:51586 | LINC01595 | 19q13.33     | BP420239, AV687190           |           | ENSG00000259108 |          |           |
| HGNC:51591 | LINC01596 | 4q35.2       | BX094246, AI806912           |           | ENSG00000250666 |          |           |
| HGNC:51594 | LINC01597 | 20q11.1      | AK127732                     |           | ENSG00000205611 |          |           |
| HGNC:51597 | LINC01598 | 20q11.1      | BX100171, AA470003, AW342060 |           | ENSG00000231934 |          |           |
| HGNC:27285 | LINC01599 | 14q21.3      | AF390030                     | 196913    | ENSG00000168260 |          | NR_102736 |
| HGNC:21600 | LINC01600 | 6p25.2       | AK056496                     | 154386    | ENSG00000164385 |          | NR_131168 |
| HGNC:51651 | LINC01601 | 18q12.3      | BX119171                     | 105667213 |                 |          | NR_131768 |
| HGNC:51634 | LINC01602 | 8q12.1       | BC040611                     | 100505477 | ENSG00000205293 | 15223130 | NR_130934 |
| HGNC:51652 | LINC01603 | 8q13.2       |                              | 100505739 | ENSG00000253479 |          | NR_110433 |
| HGNC:51654 | LINC01605 | 8p11.23      |                              | 100507420 | ENSG00000253161 |          | NR_121620 |
| HGNC:51656 | LINC01606 | 8q12.1       |                              | 100507651 | ENSG00000253301 |          | NR_038235 |
| HGNC:51660 | LINC01607 | 8q21.13      |                              | 101927067 | ENSG00000272138 |          | NR_125410 |
| HGNC:51662 | LINC01608 | 8q23.2       |                              | 101927459 | ENSG00000253877 |          | NR_125416 |
| HGNC:51663 | LINC01609 | 8q23.2-q23.3 |                              | 101927487 | ENSG00000253103 |          | NR_125418 |
| HGNC:51791 | LINC01611 | 6q14.3       |                              | 105377880 | ENSG00000231776 | 25364816 |           |
| HGNC:51837 | LINC01612 | 4q33         |                              | 101928223 | ENSG00000250266 | 26045391 | NR_125889 |
| HGNC:51842 | LINC01613 | 9q33.2       |                              | 106146149 | ENSG00000261432 | 26269497 | NR_132393 |
| HGNC:51847 | LINC01614 | 2q35         |                              | 105373869 | ENSG00000230838 | 25116943 | NR_132383 |
| HGNC:51898 | LINC01615 | 6q27         | CB123670                     | 101929484 | ENSG00000223485 |          | NR_132622 |
| HGNC:51900 | LINC01616 | 11p14.1      | AK095844                     | 106456574 | ENSG00000261340 | 26318290 | NR_132652 |
| HGNC:30442 | LINC01617 | 8q21.11      | AA861243                     | 101926947 |                 | 26328256 |           |
| HGNC:27195 | LINC01618 | 4q12         |                              | 152578    | ENSG00000250302 | 26328256 | NR_040106 |
| HGNC:27409 | LINC01619 | 12q21.33     |                              | 256021    | ENSG00000257242 |          | NR_132339 |
| HGNC:16195 | LINC01620 | 20q13.12     |                              | 140834    | ENSG00000168746 |          | NR_132342 |
| HGNC:14109 | LINC01621 | 6q14.1       |                              | 89758     | ENSG00000235357 |          | NR_131786 |
| HGNC:27768 | LINC01622 | 6p25.3       |                              | 285768    |                 | 12477932 | NR_027115 |
| HGNC:52050 | LINC01623 | 6p22.1       |                              | 401242    | ENSG00000225595 |          | NR_033379 |

|            |             |         |                              |           |                 |                              |           |
|------------|-------------|---------|------------------------------|-----------|-----------------|------------------------------|-----------|
| HGNC:52051 | LINC01624   | 6q27    |                              | 401289    | ENSG00000227508 |                              | NR_104177 |
| HGNC:52052 | LINC01625   | 6q24.1  |                              | 645434    | ENSG00000238099 |                              | NR_033919 |
| HGNC:52257 | LINC01626   | 6q13    |                              | 102724000 | ENSG00000223765 |                              | NR_121615 |
| HGNC:52258 | LINC01627   | 9p13.2  |                              |           | ENSG00000224648 | 26393913                     |           |
| HGNC:52259 | LINC01628   | 2p14    |                              | 102724321 | ENSG00000232688 | 26393913                     | NR_110600 |
| HGNC:52260 | LINC01629   | 14q24.3 |                              | 105370578 | ENSG00000258602 | 26400545                     |           |
| HGNC:49089 | LINCMD1     | 6p12.2  | BG461844                     | 101154644 | ENSG00000225613 |                              |           |
| HGNC:27368 | LINGO1-AS1  | 15q24.3 | BC042092                     | 253044    | ENSG00000259666 | 12477932                     | NR_045123 |
| HGNC:51423 | LINGO1-AS2  | 15q24.3 | BC038758                     | 101929478 | ENSG00000259281 |                              | NR_120361 |
| HGNC:48589 | LIPE-AS1    | 19q13.2 | AK096849, BM974950           | 100996307 | ENSG00000213904 |                              | NR_073179 |
| HGNC:50493 | LLPH-AS1    | 12q14.3 | DA010836                     |           | ENSG00000239335 |                              |           |
| HGNC:44477 | LMCD1-AS1   | 3p26.1  |                              | 100288428 | ENSG00000227110 |                              | NR_033378 |
| HGNC:50469 | LMF1-AS1    | 16p13.3 |                              | 101929387 | ENSG00000260439 |                              |           |
| HGNC:40738 | LMLN-AS1    | 3q29    |                              |           | ENSG00000232832 |                              |           |
| HGNC:50277 | LMO7-AS1    | 13q22.2 | AW188034                     | 101927155 | ENSG00000261105 |                              |           |
| HGNC:49790 | LMO7DN-IT1  | 13q22.2 | AI825938                     |           | ENSG00000223458 |                              |           |
| HGNC:40345 | LNK1-AS1    | 4q12    |                              |           | ENSG00000250930 |                              |           |
| HGNC:41450 | LNK1-AS2    | 4q12    |                              |           | ENSG00000248494 |                              |           |
| HGNC:26524 | LOH12CR2    | 12p13.2 | AY037867                     | 503693    | ENSG00000205791 | 11896457, 15284860           | NR_024061 |
| HGNC:44169 | LOXL1-AS1   | 15q24.1 | AK056885                     | 100287616 | ENSG00000261801 |                              | NR_040066 |
| HGNC:40346 | LPP-AS1     | 3q28    |                              |           | ENSG00000224563 |                              |           |
| HGNC:27952 | LPP-AS2     | 3q27.3  | BC042414                     | 339929    | ENSG00000270959 | 12477932                     | NR_036497 |
| HGNC:51694 | LRP1-AS     | 12q13.3 |                              | 105751187 | ENSG00000259125 | 25937287                     |           |
| HGNC:44128 | LRP4-AS1    | 11p11.2 |                              | 100507401 | ENSG00000247675 |                              | NR_038909 |
| HGNC:15571 | LRRC2-AS1   | 3p21.3  | AJ312775                     | 83598     |                 |                              | NR_073385 |
| HGNC:43636 | LRRC3-AS1   | 21q22.3 | AA725743, BM703952           | 100861510 | ENSG00000229356 |                              |           |
| HGNC:1270  | LRRC3DN     | 21q22.3 | AL117578                     | 54083     |                 |                              |           |
| HGNC:28619 | LRRC75A-AS1 | 17p11.2 | BC027986                     | 125144    | ENSG00000175061 | 12477932                     | NR_027160 |
| HGNC:40350 | LSAMP-AS1   | 3q13.31 |                              | 100506708 | ENSG00000240922 |                              |           |
| HGNC:37824 | LSINCT5     | 5p15.33 | GU228577                     | 101234261 |                 | 21532345, 20214974, 23359273 |           |
| HGNC:51845 | LUADT1      | 6q24.3  |                              |           | ENSG00000196634 | 26291312                     |           |
| HGNC:48498 | LUCAT1      | 5q14.3  | BQ232757, AK091866,          | 100505994 | ENSG00000248323 | 23672216                     |           |
| HGNC:51199 | LUNAR1      | 15q26.3 |                              |           |                 | 25083870                     |           |
| HGNC:49761 | LURAP1L-AS1 | 9p23    | BQ416907                     |           | ENSG00000235448 |                              |           |
| HGNC:26593 | LY86-AS1    | 6p25.1  | AK091027                     | 285780    | ENSG00000216863 |                              | NR_026970 |
| HGNC:50560 | LYPLAL1-AS1 | 1q41    |                              | 643723    | ENSG00000228063 |                              |           |
| HGNC:52055 | LYRM4-AS1   | 6p25.1  |                              | 100129461 |                 |                              | NR_126015 |
| HGNC:41320 | LYST-AS1    | 1q42.3  |                              |           | ENSG00000229463 |                              |           |
| HGNC:43630 | LZTS1-AS1   | 8p21.3  |                              |           | ENSG00000253733 |                              |           |
| HGNC:41257 | MACC1-AS1   | 7p21.1  | AI125264, BX114725           |           | ENSG00000228598 |                              |           |
| HGNC:37193 | MACROD2-AS1 | 20p12.1 | BX417920                     | 100379174 | ENSG00000235914 |                              |           |
| HGNC:16201 | MACROD2-IT1 | 20p12.1 | AI026654                     | 140848    | ENSG00000227927 |                              |           |
| HGNC:51203 | MAFA-AS1    | 8q24.3  | BE503758, BF448373, BX114021 |           | ENSG00000254338 | 25089627                     |           |
| HGNC:43649 | MAFG-AS1    | 17q25.3 | BC009233                     | 92659     | ENSG00000265688 | 12477932                     | NR_015454 |
| HGNC:51525 | MAFTRR      | 16q23.2 |                              | 102467146 | ENSG00000261390 | 25621826                     | NR_104663 |
| HGNC:45093 | MAGEA8-AS1  | Xq28    | CB961226                     |           | ENSG00000230899 | 23223008                     |           |
| HGNC:40091 | MAGII-AS1   | 3p14.1  |                              | 100873983 | ENSG00000240175 |                              |           |
| HGNC:42436 | MAGII-IT1   | 3p14.1  |                              | 151877    | ENSG00000272610 |                              |           |
| HGNC:40860 | MAGI2-AS1   | 7q21.11 |                              |           | ENSG00000251276 |                              |           |
| HGNC:40861 | MAGI2-AS2   | 7q21.11 |                              |           | ENSG00000226978 |                              |           |
| HGNC:40862 | MAGI2-AS3   | 7q21.11 |                              | 100505881 | ENSG00000234456 |                              |           |
| HGNC:30058 | MAGI2-IT1   | 7q21.11 | AF521131                     | 266671    | ENSG00000235751 | 12110681                     |           |
| HGNC:29665 | MALAT1      | 11q13.1 | AF001540                     | 378938    | ENSG00000251562 | 12970751, 22560368           | NR_002819 |
| HGNC:48719 | MAMDC2-AS1  | 9q21.12 |                              | 100507244 | ENSG00000204706 |                              |           |

|            |              |             |                    |           |                 |                      |           |
|------------|--------------|-------------|--------------------|-----------|-----------------|----------------------|-----------|
| HGNC:48715 | MAN1B1-AS1   | 9q34.3      |                    | 100289341 |                 |                      | NR_027447 |
| HGNC:43732 | MANEA-AS1    | 6q16.1      | BC047582           | 101927288 | ENSG00000261366 |                      | NR_047502 |
| HGNC:44359 | MAP3K14-AS1  | 17q21.31    | AK311429, BC031942 | 100133991 | ENSG00000267278 |                      | NR_024434 |
| HGNC:24091 | MAPKAPK5-AS1 | 12q24.12    |                    | 51275     | ENSG00000234608 | 12477932             | NR_015404 |
| HGNC:43738 | MAPT-AS1     | 17q21.31    |                    | 100128977 | ENSG00000264589 |                      | NR_024559 |
| HGNC:43741 | MAPT-IT1     | 17q21.31    |                    | 100130148 |                 |                      | NR_024560 |
| HGNC:40865 | MAST4-AS1    | 5q12.3      |                    | 100506600 | ENSG00000229666 |                      |           |
| HGNC:41448 | MAST4-IT1    | 5q12.3      |                    |           | ENSG00000249057 |                      |           |
| HGNC:40364 | MATN1-AS1    | 1p35.2      | AK057725           | 100129196 | ENSG00000186056 |                      | NR_034182 |
| HGNC:44584 | MBNL1-AS1    | 3q25.1      | AK304857, BM790896 | 401093    |                 |                      | NR_027037 |
| HGNC:40366 | MCCC1-AS1    | 3q27.1      |                    |           | ENSG00000243368 |                      |           |
| HGNC:39825 | MCF2L-AS1    | 13q34       |                    | 100289410 | ENSG00000235280 |                      |           |
| HGNC:48980 | MCHR2-AS1    | 6q16.2      |                    | 728012    | ENSG00000229315 |                      |           |
| HGNC:16417 | MCM3AP-AS1   | 21q22.3     | AK001370           | 114044    | ENSG00000215424 | 12036297             | NR_002776 |
| HGNC:51230 | MCM8-AS1     | 20p12.3     | AK058185           | 101929225 | ENSG00000278719 |                      | NR_110101 |
| HGNC:51655 | MCPH1-AS1    | 8p23.1      |                    | 100507530 | ENSG00000249898 |                      | NR_125386 |
| HGNC:39764 | MDC1-AS1     | 6p21.33     |                    |           | ENSG00000224328 | 25514464             |           |
| HGNC:39213 | MED4-AS1     | 13q14.2     |                    |           | ENSG00000229111 |                      |           |
| HGNC:48908 | MEF2C-AS1    | 5q14.3      | CD702404           | 101929423 | ENSG00000248309 | 23801869             |           |
| HGNC:14575 | MEG3         | 14q32.2     | AB032607           | 55384     | ENSG00000214548 | 10759892, 23790166   | NR_002766 |
| HGNC:14574 | MEG8         | 14q32.31    | CA396130, AW026953 | 79104     | ENSG00000258399 | 11481034, 11337479,  | NR_024149 |
| HGNC:43874 | MEG9         | 14q32.31    | AK094562, AK021527 | 100507257 | ENSG00000223403 | 19194500             |           |
| HGNC:40370 | MEIS1-AS2    | 2p14        |                    | 100873998 | ENSG00000230749 |                      |           |
| HGNC:40369 | MEIS1-AS3    | 2p14        | DA226783, DA702499 | 730198    | ENSG00000226819 |                      |           |
| HGNC:50672 | MEOX2-AS1    | 7p21.2      |                    | 101927524 | ENSG00000229108 |                      |           |
| HGNC:17991 | MESTIT1      | 7q32.2      | AF482998           | 317751    |                 | 12095916             | NR_004382 |
| HGNC:40373 | MF12-AS1     | 3q29        |                    | 100507057 | ENSG00000228109 |                      |           |
| HGNC:51356 | MGAT3-AS1    | 22q13.1     |                    |           | ENSG00000227188 | 25294924             |           |
| HGNC:51291 | MHRT         | 14q11.2     |                    | 104564225 |                 | 25119045             | NR_126491 |
| HGNC:33425 | MIAT         | 22q12.1     | AB263414           | 440823    | ENSG00000225783 | 17066261, 17623775,  | NR_003491 |
| HGNC:50731 | MIATNB       | 22q12.1     | AK026502           | 102724827 | ENSG00000244625 |                      |           |
| HGNC:40932 | MID1IP1-AS1  | Xp11.4      |                    |           | ENSG00000238123 |                      |           |
| HGNC:27669 | MIF-AS1      | 22q11.23    |                    | 284889    | ENSG00000218537 | 24066864             | NR_038911 |
| HGNC:33464 | MIMT1        | 19q13.43    | EF110915           | 100073347 |                 | 17509818             | NR_024059 |
| HGNC:51653 | MINCR        | 8q24.3      |                    | 100507316 | ENSG00000253716 | 26351698             | NR_120682 |
| HGNC:30049 | MIR7-3HG     | 19p13.3     | AB058892           | 284424    | ENSG00000176840 | 11854097             | NR_027148 |
| HGNC:27388 | MIR9-3HG     | 15q26.1     |                    | 254559    | ENSG00000255571 |                      | NR_133001 |
| HGNC:23564 | MIR17HG      | 13q31.3     | AB176707           | 407975    | ENSG00000215417 | 15126345, 15944707,  | NR_027349 |
| HGNC:28219 | MIR22HG      | 17p13.3     | BX648321           | 84981     | ENSG00000186594 | 8619474, 9110174, 24 | NR_028502 |
| HGNC:37187 | MIR31HG      | 9p21.3      | AK124391           | 554202    | ENSG00000171889 | 15364902, 22289355,  | NR_027054 |
| HGNC:51913 | MIR34AHG     | 1p36.22     | EF592573           | 106614088 |                 | 17540599             | NR_132742 |
| HGNC:1274  | MIR99AHG     | 21q11-q21.1 | AF486622           | 388815    | ENSG00000215386 | 12036298, 25027842   | NR_027790 |
| HGNC:39522 | MIR100HG     | 11q24.1     | AK091713           | 399959    |                 | 19531736, 21031016,  | NR_024430 |
| HGNC:48723 | MIR124-2HG   | 8q12.3      |                    | 100130155 | ENSG00000254377 |                      | NR_109792 |
| HGNC:49594 | MIR133A1HG   | 18q11.2     | BX648566           | 102723167 | ENSG00000265142 |                      | NR_029662 |
| HGNC:42871 | MIR137HG     | 1p21.3      | AK094607           | 400765    | ENSG00000225206 |                      | NR_046105 |
| HGNC:35460 | MIR155HG     | 21q21.3     | AF402776           | 114614    | ENSG00000234883 | 21296997, 23246696   | NR_001458 |
| HGNC:48659 | MIR181A1HG   | 1q32.1      |                    | 100131234 | ENSG00000229989 |                      | NR_040073 |
| HGNC:37188 | MIR181A2HG   | 9q33.3      |                    | 100379345 | ENSG00000224020 | 15364906             | NR_038975 |
| HGNC:51945 | MIR193BHG    | 16p13.12    |                    | 100129781 | ENSG00000262454 |                      | NR_132983 |
| HGNC:51946 | MIR194-2HG   | 11q13.1     |                    | 105369343 | ENSG00000229719 |                      |           |
| HGNC:49402 | MIR202HG     | 10q26.3     | DB447466           | 101927671 | ENSG00000166917 |                      | NR_108078 |
| HGNC:43562 | MIR205HG     | 1q32.2      |                    | 642587    | ENSG00000230937 |                      |           |
| HGNC:39524 | MIR210HG     | 11p15.5     |                    | 100506211 | ENSG00000247095 | 26400545             | NR_038262 |

|            |             |                |                     |           |                 |                    |           |
|------------|-------------|----------------|---------------------|-----------|-----------------|--------------------|-----------|
| HGNC:50537 | MIR217HG    | 2p16.1         | DA732292            |           | ENSG00000226702 |                    |           |
| HGNC:49555 | MIR222HG    | Xp11.3         |                     |           | ENSG00000270069 | 23697773           |           |
| HGNC:50346 | MIR325HG    | Xq13.3-q21.1   | AK311342            | 101928469 |                 |                    | NR_110400 |
| HGNC:20136 | MIR381HG    | 14q32.31       | AA861571            | 378881    | ENSG00000258861 |                    | NR_104192 |
| HGNC:39523 | MIR497HG    | 17p13.1        |                     | 100506755 | ENSG00000267532 |                    | NR_038310 |
| HGNC:28258 | MIR503HG    | Xq26.3         |                     | 84848     | ENSG00000223749 | 24463510           | NR_024607 |
| HGNC:52006 | MIR548XHG   | 21q21.1        |                     | 101927797 | ENSG00000224141 |                    | NR_109925 |
| HGNC:23642 | MIR600HG    | 9q34.11        | BC015678            | 81571     | ENSG00000236901 | 12477932           | NR_026677 |
| HGNC:27659 | MIR646HG    | 20q13.33       |                     | 284757    | ENSG00000228340 |                    | NR_046099 |
| HGNC:27662 | MIR663AHG   | 20p11.1        |                     | 284801    | ENSG00000227195 | 24932682           | NR_040095 |
| HGNC:49204 | MIR670HG    | 11p11.2        |                     | 100507261 | ENSG00000235661 |                    |           |
| HGNC:51386 | MIR762HG    | 16p11.2        |                     | 101928736 | ENSG00000260083 |                    | NR_110940 |
| HGNC:44332 | MIR924HG    | 18q12.2-q12.1  | AK090603, BG220862, | 647946    |                 |                    | NR_024391 |
| HGNC:51555 | MIR2052HG   | 8q21.11-q21.13 |                     | 441355    | ENSG00000254349 |                    | NR_033830 |
| HGNC:51999 | MIR2117HG   | 17q21.31       | DA448302            | 106660605 | ENSG00000267151 |                    |           |
| HGNC:51944 | MIR3142HG   | 5q33.3         |                     |           | ENSG00000253522 |                    |           |
| HGNC:50676 | MIR3663HG   | 10q25.3        | BC039338            | 101927704 | ENSG00000234474 |                    | NR_121650 |
| HGNC:52001 | MIR3681HG   | 2p24.3         |                     | 100506457 | ENSG00000224184 |                    | NR_110196 |
| HGNC:52002 | MIR3945HG   | 4q35.1         |                     | 731424    | ENSG00000251230 |                    | NR_037867 |
| HGNC:51104 | MIR3976HG   | 18p11.31       |                     | 645355    | ENSG00000261738 |                    |           |
| HGNC:27861 | MIR4290HG   | 9q22.2         |                     | 286370    | ENSG00000227555 |                    | NR_038882 |
| HGNC:52003 | MIR4300HG   | 11q14.1        |                     | 101928989 | ENSG00000245832 |                    | NR_120571 |
| HGNC:52004 | MIR4307HG   | 14q12          |                     | 101927081 | ENSG00000257612 |                    | NR_110041 |
| HGNC:52005 | MIR4432HG   | 2p16.1         |                     | 106660609 | ENSG00000223929 |                    | NR_132991 |
| HGNC:35163 | MIR4435-2HG | 2q13           | BX647931            | 541471    | ENSG00000172965 | 19531736, 25888808 | NR_015395 |
| HGNC:49008 | MIR4458HG   | 5p15.31        |                     | 100505738 | ENSG00000247516 |                    | NR_039989 |
| HGNC:42773 | MIR4500HG   | 13q31.2        |                     | 642345    | ENSG00000228824 |                    | NR_033829 |
| HGNC:27448 | MIR4697HG   | 11q25          |                     | 283174    |                 |                    | NR_024344 |
| HGNC:52007 | MIR5689HG   | 6p24.3         |                     | 106660610 | ENSG00000229401 |                    | NR_132993 |
| HGNC:49838 | MIR7515HG   | 2p25.2         | BX119852, DB061664  | 102800314 | ENSG00000236172 |                    | NR_110497 |
| HGNC:37189 | MIRLET7BHG  | 22q13.31       |                     | 400931    | ENSG00000197182 | 15364908, 24381249 | NR_027033 |
| HGNC:37186 | MIRLET7DHG  | 9q22.32        |                     | 158257    | ENSG00000230262 | 15364901           | NR_046163 |
| HGNC:40106 | MIS18A-AS1  | 21q22.11       | BG209386            |           | ENSG00000227256 |                    |           |
| HGNC:40374 | MKLN1-AS    | 7q32.3         | AK054623, DB039005  | 100506881 | ENSG00000236753 |                    |           |
| HGNC:44129 | MKNK1-AS1   | 1p33           | AK097731            | 100507423 |                 |                    | NR_038403 |
| HGNC:12910 | MKRN3-AS1   | 15q11-q13      |                     | 10108     |                 | 10196367, 9237260  |           |
| HGNC:50686 | MKX-AS1     | 10p12.1        | BU195543            | 101929202 | ENSG00000230500 |                    |           |
| HGNC:40963 | MLIP-AS1    | 6p12.1         |                     |           | ENSG00000235050 |                    |           |
| HGNC:41461 | MLIP-IT1    | 6p12.1         |                     |           | ENSG00000236996 |                    |           |
| HGNC:27935 | MLK7-AS1    | 2q31.1         | BC040565            | 339751    | ENSG00000238133 | 12477932           | NR_033882 |
| HGNC:21236 | MLLT4-AS1   | 6q27           |                     | 653483    | ENSG00000198221 | 10382971           | NR_027906 |
| HGNC:40376 | MME-AS1     | 3q25.2         |                     |           | ENSG00000240666 |                    |           |
| HGNC:44421 | MMP24-AS1   | 20q11.22       | BG546906, DA451679  |           | ENSG00000126005 |                    |           |
| HGNC:51372 | MMP25-AS1   | 16p13.3        | BC026114, AK124978  | 100507419 | ENSG00000261971 |                    | NR_123723 |
| HGNC:48954 | MNX1-AS1    | 7q36.3         |                     | 645249    | ENSG00000243479 |                    |           |
| HGNC:40278 | MNX1-AS2    | 7q36.3         | AI761375            | 105375606 | ENSG00000235029 |                    |           |
| HGNC:40377 | MORC1-AS1   | 3q13.13        |                     | 100506506 | ENSG00000239314 |                    |           |
| HGNC:26662 | MORC2-AS1   | 22q12.2        | AK093120            | 150291    | ENSG00000235989 |                    | NR_026920 |
| HGNC:27991 | MORF4L2-AS1 | Xq22.2         | BC043382            | 340544    | ENSG00000231154 | 12477932           | NR_038978 |
| HGNC:41263 | MPRIP-AS1   | 17p11.2        | BG548937            | 100874529 | ENSG00000225442 |                    |           |
| HGNC:51140 | MRGPRF-AS1  | 11q13.3        |                     | 101928200 | ENSG00000256508 |                    |           |
| HGNC:26691 | MRGPRG-AS1  | 11p15.4        | AK097749            | 283303    | ENSG00000236301 |                    | NR_027138 |
| HGNC:42812 | MRPL23-AS1  | 11p15.5        |                     | 100133545 | ENSG00000226416 |                    | NR_024471 |
| HGNC:43434 | MRVII-AS1   | 11p15.4        |                     | 100129827 | ENSG00000177112 |                    | NR_034093 |

|            |              |              |          |           |                 |                                   |           |
|------------|--------------|--------------|----------|-----------|-----------------|-----------------------------------|-----------|
| HGNC:48724 | MSC-AS1      | 8q13.3       |          | 100132891 | ENSG00000235531 |                                   | NR_033652 |
| HGNC:50279 | MT-LIPCAR    | mitochondria | JA760602 | 103504742 |                 | 24663402                          |           |
| HGNC:40242 | MTOR-AS1     | 1p36.22      |          |           | ENSG00000225602 |                                   |           |
| HGNC:40924 | MTUS2-AS1    | 13q12.3      |          |           | ENSG00000179141 |                                   |           |
| HGNC:40923 | MTUS2-AS2    | 13q12.3      |          |           | ENSG00000236758 |                                   |           |
| HGNC:37457 | MYB-AS1      | 6q22-q23     |          |           | ENSG00000236703 |                                   |           |
| HGNC:41023 | MYCBP2-AS1   | 13q22.3      |          |           | ENSG00000236051 |                                   |           |
| HGNC:41024 | MYCBP2-AS2   | 13q22.3      |          |           | ENSG00000229521 |                                   |           |
| HGNC:16911 | MYCNOS       | 2p24.1       | S49953   | 10408     | ENSG00000233718 | 1419902, 12880964, 19615087, 2439 |           |
| HGNC:32684 | MYCNUT       | 2p24.3       | W87755   |           | ENSG00000223850 | 24906397                          |           |
| HGNC:50609 | MYHAS        | 17p13.1      | AK097500 | 100128560 | ENSG00000272975 |                                   |           |
| HGNC:42440 | MYLK-AS1     | 3q21.1       |          | 100506826 | ENSG00000239523 |                                   |           |
| HGNC:40387 | MYLK-AS2     | 3q21.1       |          |           | ENSG00000250174 |                                   |           |
| HGNC:39913 | MYO16-AS1    | 13q33.3      |          |           | ENSG00000236242 |                                   |           |
| HGNC:39914 | MYO16-AS2    | 13q33.3      |          |           | ENSG00000229938 |                                   |           |
| HGNC:49274 | MYT1L-AS1    | 2p25.3       |          | 730811    | ENSG00000225619 |                                   |           |
| HGNC:51271 | MZF1-AS1     | 19q13.43     | BC024736 | 100131691 | ENSG00000267858 |                                   | NR_027334 |
| HGNC:25038 | N4BP2L2-IT2  | 13q13.1      | U50531   | 116828    |                 | 8812419                           | NR_026928 |
| HGNC:41016 | NAALADL2-AS1 | 3q26.3       |          |           | ENSG00000225552 |                                   |           |
| HGNC:41015 | NAALADL2-AS2 | 3q26.3       |          |           | ENSG00000226779 |                                   |           |
| HGNC:41014 | NAALADL2-AS3 | 3q26.3       |          |           | ENSG00000230292 |                                   |           |
| HGNC:41143 | NADK2-AS1    | 5p13.2       | BC033402 |           | ENSG00000245711 |                                   |           |
| HGNC:44184 | NAGPA-AS1    | 16p13.3      | AK055222 | 100507589 |                 |                                   | NR_038913 |
| HGNC:42743 | NALCN-AS1    | 13q33.1      |          | 100885778 | ENSG00000233009 |                                   |           |
| HGNC:51192 | NALT1        | 9q34.3       |          | 101928483 | ENSG00000237886 | 26330272                          | NR_121577 |
| HGNC:42408 | NAMA         | 9q22.33      | DQ673922 | 100996569 |                 | 17415708                          |           |
| HGNC:44118 | NAPA-AS1     | 19q13.32-q13 | AK057858 | 100505681 |                 |                                   | NR_038452 |
| HGNC:43651 | NARF-IT1     | 17q25.3      |          | 100506001 |                 |                                   |           |
| HGNC:40744 | NAV2-AS1     | 11p15.1      |          |           | ENSG00000254894 |                                   |           |
| HGNC:40743 | NAV2-AS2     | 11p15.1      |          |           | ENSG00000254453 |                                   |           |
| HGNC:40742 | NAV2-AS3     | 11p15.1      |          |           | ENSG00000254542 |                                   |           |
| HGNC:40741 | NAV2-AS4     | 11p15.1      |          | 399876    | ENSG00000254622 |                                   |           |
| HGNC:40740 | NAV2-AS5     | 11p15.1      |          | 100874012 | ENSG00000255043 |                                   |           |
| HGNC:41416 | NAV2-IT1     | 11p15.1      |          |           | ENSG00000255270 |                                   |           |
| HGNC:49075 | NBAT1        | 6p22.3       |          | 729177    | ENSG00000260455 | 25859549, 26378045                | NR_034143 |
| HGNC:20691 | NBR2         | 17q21        | U88573   | 10230     | ENSG00000198496 | 9215675, 15777733                 | NR_003108 |
| HGNC:48675 | NCAM1-AS1    | 11q23.2      |          | 100288346 | ENSG00000227487 |                                   |           |
| HGNC:40392 | NCBP2-AS1    | 3q29         |          |           | ENSG00000225578 |                                   |           |
| HGNC:25121 | NCBP2-AS2    | 3q29         | BC007882 | 152217    | ENSG00000270170 | 12477932                          | NM_138487 |
| HGNC:49645 | NCK1-AS1     | 3q22.3       |          | 101927597 | ENSG00000239213 |                                   |           |
| HGNC:41497 | NCKAP5-IT1   | 2q21.2       |          |           | ENSG00000232474 |                                   |           |
| HGNC:40954 | NCOA7-AS1    | 6q22.32      | AW444508 |           | ENSG00000232131 | 23801869                          |           |
| HGNC:37153 | NCRUPAR      | 5q13.3       |          | 100302746 |                 | 12084570                          | NR_028375 |
| HGNC:40844 | NDFIP2-AS1   | 13q31.1      |          |           | ENSG00000232132 |                                   |           |
| HGNC:40395 | NDP-AS1      | Xp11.3       |          |           | ENSG00000236276 |                                   |           |
| HGNC:45273 | NDUFA6-AS1   | 22q13.2      | BC039542 | 100132273 | ENSG00000237037 |                                   | NR_034118 |
| HGNC:40396 | NDUFB2-AS1   | 7q34         | AK129584 | 100134713 | ENSG00000240889 |                                   | NR_024454 |
| HGNC:50826 | NDUFV2-AS1   | 18p11.22     |          | 101927275 | ENSG00000266053 |                                   |           |
| HGNC:30815 | NEAT1        | 11q13.1      | AF080092 | 283131    | ENSG00000245532 | 9253601, 9858482, 12              | NR_028272 |
| HGNC:44899 | NEBL-AS1     | 10p12.31     |          | 100128511 | ENSG00000231920 |                                   | NR_046283 |
| HGNC:41432 | NEGR1-IT1    | 1p31.1       | BC042082 |           | ENSG00000228853 |                                   |           |
| HGNC:51220 | NEURL1-AS1   | 10q24.33     | AA399019 | 102724341 | ENSG00000235470 |                                   | NR_120675 |
| HGNC:31983 | NEXN-AS1     | 1p31.1       | AK075118 | 374987    | ENSG00000235927 |                                   | NM_199343 |
| HGNC:40402 | NFIA-AS1     | 1p31.3       |          | 645030    | ENSG00000237853 | 25265644                          | NR_104180 |

|            |             |          |                       |           |                 |                    |           |
|------------|-------------|----------|-----------------------|-----------|-----------------|--------------------|-----------|
| HGNC:40401 | NFIA-AS2    | 1p31.3   |                       | 100996570 | ENSG00000237928 |                    |           |
| HGNC:49451 | NFYC-AS1    | 1p34.2   |                       | 100130557 | ENSG00000272145 |                    |           |
| HGNC:40403 | NHS-AS1     | Xp22.13  |                       |           | ENSG00000230020 |                    |           |
| HGNC:27385 | NIFK-AS1    | 2q14.3   |                       | 254128    | ENSG00000236859 | 12477932           |           |
| HGNC:51293 | NIPBL-AS1   | 5p13.2   |                       | 646719    |                 | 24007600           | NR_046262 |
| HGNC:51599 | NKILA       | 20q13.31 | AK056098              | 105416157 | ENSG00000278709 | 25759022, 26069731 | NR_131157 |
| HGNC:40585 | NKX2-1-AS1  | 14q13.3  |                       | 100506237 | ENSG00000253563 |                    |           |
| HGNC:37154 | NKX2-2-AS1  | 20p11.22 |                       |           | ENSG00000258197 | 18538132           |           |
| HGNC:40676 | NLGN1-AS1   | 3q26.31  |                       |           | ENSG00000228213 |                    |           |
| HGNC:38793 | NLGN4Y-AS1  | Yq11.221 |                       | 100874056 | ENSG00000228787 |                    |           |
| HGNC:49005 | NNT-AS1     | 5p12     |                       | 100652772 | ENSG00000248092 |                    |           |
| HGNC:20205 | NOP14-AS1   | 4p16.3   | AB000465              | 317648    | ENSG00000249673 | 9734812            | NR_015453 |
| HGNC:44311 | NORAD       | 20q11.23 | AI619767, AK090641, I | 647979    | ENSG00000260032 |                    | NR_027451 |
| HGNC:19827 | NOVA1-AS1   | 14q12    | AI278049              | 387977    | ENSG00000257842 |                    |           |
| HGNC:24129 | NPHP3-AS1   | 3q22.1   | BC048124              | 348808    | ENSG00000248724 | 12477932           | NR_002811 |
| HGNC:37635 | NPPA-AS1    | 1p36.21  |                       |           | ENSG00000242349 | 19671135           |           |
| HGNC:22128 | NPSR1-AS1   | 7p14.3   | BC031961              | 404744    | ENSG00000197085 | 15073379           | NR_015356 |
| HGNC:45091 | NPTN-IT1    | 15q24.1  | AK055007              | 101241892 |                 | 23395002           | NR_103844 |
| HGNC:48622 | NR2F1-AS1   | 5q15     | BC010610, DA718791    | 441094    | ENSG00000237187 | 23583100           | NR_021490 |
| HGNC:44222 | NR2F2-AS1   | 15q26.2  | AK000872              | 644192    | ENSG00000247809 |                    | XR_109225 |
| HGNC:48588 | NRAV        | 12q24.31 | AK026783, BC065744    | 100506668 | ENSG00000248008 | 25525793           | NR_038854 |
| HGNC:40780 | NREP-AS1    | 5q22.1   |                       |           | ENSG00000250095 |                    |           |
| HGNC:43633 | NRG1-IT1    | 8p12     | BC037250              |           | ENSG00000253974 |                    |           |
| HGNC:43635 | NRG1-IT3    | 8p12     |                       |           | ENSG00000254049 |                    |           |
| HGNC:31429 | NRG3-AS1    | 10q23.1  | CF272718, AA383013,   | 101929590 | ENSG00000225738 |                    |           |
| HGNC:51269 | NRIR        | 2p25.2   | BQ437827              |           | ENSG00000225964 | 25122750           |           |
| HGNC:37079 | NRON        | 9q33.3   |                       | 641373    | ENSG00000253079 | 16141075           | NR_045006 |
| HGNC:51222 | NRSN2-AS1   | 20p13    | BG249690              | 100507459 | ENSG00000225377 |                    | NR_109990 |
| HGNC:32293 | NTM-AS1     | 11q25    | AK127362              | 101929637 | ENSG00000224795 |                    | NR_126159 |
| HGNC:41437 | NTM-IT      | 11q25    | AA398869              |           | ENSG00000238262 |                    |           |
| HGNC:27532 | NTRK3-AS1   | 15q25.3  | AK097486              | 283738    | ENSG00000260305 |                    | NR_038229 |
| HGNC:40419 | NUCB1-AS1   | 19q13.33 |                       |           | ENSG00000235191 |                    |           |
| HGNC:50502 | NUP50-AS1   | 22q13.31 |                       | 100506714 | ENSG00000226328 |                    |           |
| HGNC:45161 | NUTM2A-AS1  | 10q23.2  | AK311174, AK309777    | 728190    | ENSG00000223482 |                    | NR_024397 |
| HGNC:51204 | NUTM2B-AS1  | 10q22.3  |                       | 101060691 | ENSG00000225484 |                    | NR_120613 |
| HGNC:40751 | OCIAD1-AS1  | 4p11     | AI018597, BG200457    |           | ENSG00000248256 |                    |           |
| HGNC:49461 | ODF2-AS1    | 9q34.11  | AW303426              |           | ENSG00000225951 |                    |           |
| HGNC:40724 | OGFR-AS1    | 20q13.33 | BQ187924, CA412981    |           | ENSG00000229873 |                    |           |
| HGNC:43563 | OIP5-AS1    | 15q15.1  |                       | 729082    | ENSG00000247556 | 22196729           | NR_026757 |
| HGNC:28060 | OLMALINC    | 10q24.31 | BC045787              | 90271     | ENSG00000235823 | 12477932, 23040067 | NR_026762 |
| HGNC:39192 | OOEP-AS1    | 6q13     |                       |           | ENSG00000231332 |                    |           |
| HGNC:40421 | OPA1-AS1    | 3q29     |                       | 100873941 | ENSG00000224855 |                    |           |
| HGNC:41366 | OPCML-IT1   | 11q25    |                       |           | ENSG00000254896 |                    |           |
| HGNC:41365 | OPCML-IT2   | 11q25    |                       |           | ENSG00000255371 |                    |           |
| HGNC:49168 | OR2A1-AS1   | 7q35     | BC040701              | 101928492 | ENSG00000244479 |                    |           |
| HGNC:40767 | OSBPL10-AS1 | 3p23     |                       |           | ENSG00000232490 |                    |           |
| HGNC:48585 | OSER1-AS1   | 20q13.12 |                       | 100505783 | ENSG00000223891 |                    |           |
| HGNC:41009 | OSGEPL1-AS1 | 2q32.2   | BX474356, DB142079    |           | ENSG00000253559 |                    |           |
| HGNC:50296 | OSMR-AS1    | 5p13.1   |                       | 101929768 | ENSG00000249740 |                    |           |
| HGNC:43666 | OSTM1-AS1   | 6q21     | BC031282              | 100287366 | ENSG00000225174 |                    |           |
| HGNC:41250 | OSTN-AS1    | 3q28     |                       |           | ENSG00000233308 |                    |           |
| HGNC:50466 | OTUD6B-AS1  | 8q21.3   |                       | 100506365 | ENSG00000253738 |                    |           |
| HGNC:43906 | OTX2-AS1    | 14q22.3  | BC041486              | 100309464 | ENSG00000248550 | 15703187           | NR_029385 |
| HGNC:49422 | OVAAL       | 1q25.3   | BC036830              | 148756    | ENSG00000236719 | 24265805           |           |



|            |              |          |                    |           |                 |                     |           |
|------------|--------------|----------|--------------------|-----------|-----------------|---------------------|-----------|
| HGNC:44484 | OVCH1-AS1    | 12p11.22 |                    | 101055625 | ENSG00000257599 |                     |           |
| HGNC:49319 | OVOL1-AS1    | 11q13.1  | AI458914           | 101927828 | ENSG00000255120 |                     |           |
| HGNC:40423 | OXCT1-AS1    | 5p13.1   | DB470733, DB476656 |           | ENSG00000248668 |                     |           |
| HGNC:40886 | P3H2-AS1     | 3q28     |                    |           | ENSG00000225764 |                     |           |
| HGNC:43560 | P4HA2-AS1    | 5q31.1   | BG772701           |           | ENSG00000237714 |                     |           |
| HGNC:50345 | PABPC1L2B-AS | Xq13.2   |                    | 101928345 | ENSG00000226725 |                     |           |
| HGNC:31845 | PABPC5-AS1   | Xq21.31  |                    | 102724167 | ENSG00000234161 |                     |           |
| HGNC:50552 | PACERR       | 1q31.1   | DA380694, BU733503 |           | ENSG00000273129 | 24843008            |           |
| HGNC:27772 | PACRG-AS1    | 6q26     |                    | 285796    | ENSG00000281692 |                     | NR_028390 |
| HGNC:40871 | PACRG-AS2    | 6q26     |                    | 101929239 | ENSG00000225437 |                     | NR_110871 |
| HGNC:52053 | PACRG-AS3    | 6q26     |                    | 729658    | ENSG00000225683 |                     | NR_122120 |
| HGNC:39932 | PAN3-AS1     | 13q12.2  | BC045730           | 100288730 |                 |                     | NR_029383 |
| HGNC:52282 | PANCR        | 4q25     |                    | 105377363 | ENSG00000250103 | 26783232            |           |
| HGNC:44048 | PANDAR       | 6p21.2   | JF803844           | 101154753 |                 | 21642992            | NR_109836 |
| HGNC:35152 | PAPPA-AS1    | 9q33.2   |                    | 493913    | ENSG00000256040 | 15656990            | XR_041634 |
| HGNC:35160 | PAPPA-AS2    | 9q33.1   | AK092105           |           | ENSG00000226604 | 19531736            |           |
| HGNC:50861 | PAQR9-AS1    | 3q23     | DB456045           | 101927832 | ENSG00000241570 |                     |           |
| HGNC:44964 | PARD3-AS1    | 10p11.21 | AI792816, BX089194 | 100505601 | ENSG00000226386 |                     |           |
| HGNC:44109 | PARD6G-AS1   | 18q23    | AK056304           | 100130522 |                 |                     | NR_028339 |
| HGNC:17263 | PART1        | 5q12.1   | AF163475           | 25859     | ENSG00000152931 | 10706094, 23726844  | NR_024617 |
| HGNC:50886 | PARTICL      | 2p11.2   | BC009563           | 100630918 |                 | 25900080            | NR_038942 |
| HGNC:49670 | PAUPAR       | 11p13    | KJ434992           | 103157000 |                 | 24488179            |           |
| HGNC:49271 | PAX8-AS1     | 2q13     | AK130275           | 654433    | ENSG00000189223 |                     |           |
| HGNC:39603 | PAXBPI-AS1   | 21q22.11 | BC038361           | 100506215 | ENSG00000238197 |                     |           |
| HGNC:27328 | PAXIP1-AS1   | 7q36.2   | BI438440           | 202781    |                 | 12477932            | NR_028090 |
| HGNC:48958 | PAXIP1-AS2   | 7q36.2   |                    | 100132707 | ENSG00000214106 |                     | NR_024476 |
| HGNC:8637  | PCA3         | 9q21.2   | AF103907           | 50652     | ENSG00000225937 | 10606244, 23130941, | NR_015342 |
| HGNC:43022 | PCAT1        | 8q24.21  | HQ605084           | 100750225 | ENSG00000253438 | 21804560, 23640607  | NR_045262 |
| HGNC:45089 | PCAT2        | 8q24.21  | BU852210           | 103164619 | ENSG00000253264 |                     |           |
| HGNC:24853 | PCAT4        | 4q21.21  | AF388200           | 118425    | ENSG00000251321 | 11536302, 15299187, | NR_026555 |
| HGNC:48665 | PCAT5        | 10p11.21 | KF154780           | 102578074 | ENSG00000280719 | 26282172            | NR_110138 |
| HGNC:43714 | PCAT6        | 1q32.1   | BI962506, AI806248 | 100506696 | ENSG00000228288 | 20887892, 23728290  |           |
| HGNC:48824 | PCAT7        | 9q22.32  |                    | 101928099 | ENSG00000231806 | 23728290            | NR_121566 |
| HGNC:48977 | PCAT14       | 22q11.23 | HQ605085           | 101978785 |                 | 21804560            | NR_109832 |
| HGNC:49211 | PCAT18       | 18q11.2  |                    | 728606    | ENSG00000265369 | 24519926            |           |
| HGNC:49593 | PCAT19       | 19q13.2  | BC070102           | 100505495 | ENSG00000267107 | 24497837            | NR_040109 |
| HGNC:50895 | PCAT29       | 15q23    |                    | 104472713 | ENSG00000259641 | 25030374            | NR_126437 |
| HGNC:42948 | PCBP1-AS1    | 2p13.3   |                    | 400960    | ENSG00000179818 |                     | NR_033872 |
| HGNC:49150 | PCBP2-OT1    | 12q13.13 | KF041153           | 102157401 |                 | 21187392            |           |
| HGNC:33548 | PCBP3-OT1    | 21q22.3  | AK126016           |           |                 | 17525332            |           |
| HGNC:39901 | PCCA-AS1     | 13q32.3  |                    |           | ENSG00000234650 |                     |           |
| HGNC:39897 | PCDH9-AS1    | 13q21.32 |                    |           | ENSG00000234527 |                     |           |
| HGNC:39896 | PCDH9-AS2    | 13q21.32 |                    |           | ENSG00000228842 |                     |           |
| HGNC:40427 | PCDH9-AS3    | 13q21.32 |                    |           | ENSG00000225263 |                     |           |
| HGNC:40428 | PCDH9-AS4    | 13q21.32 |                    |           | ENSG00000233840 |                     |           |
| HGNC:44166 | PCED1B-AS1   | 12q13.11 | AK123977           | 100233209 | ENSG00000247774 |                     | NR_026544 |
| HGNC:52263 | PCF11-AS1    | 11q14.1  | AK092827           |           | ENSG00000269939 | 26421281            |           |
| HGNC:30145 | PCGEM1       | 2q32.3   | AF223389           | 64002     | ENSG00000227418 | 11050243, 16569192, | NR_002769 |
| HGNC:37184 | PCNA-AS1     | 20p12.3  |                    | 100302739 |                 | 10488129, 24704293  |           |
| HGNC:40430 | PCOLCE-AS1   | 7q22.1   | AK097705           | 100129845 | ENSG00000224729 |                     | NR_038910 |
| HGNC:51448 | PCSK6-AS1    | 15q26.3  | BG505308           |           | ENSG00000259764 |                     |           |
| HGNC:40431 | PCYT1B-AS1   | Xp22.11  |                    |           | ENSG00000236836 |                     |           |
| HGNC:27425 | PDCD4-AS1    | 10q25.2  |                    | 282997    | ENSG00000203497 |                     | NR_026932 |
| HGNC:43698 | PDX1-AS1     | 13q12.2  | BX383058, CR593175 |           | ENSG00000247381 |                     |           |

|            |              |          |                              |           |                 |                              |           |
|------------|--------------|----------|------------------------------|-----------|-----------------|------------------------------|-----------|
| HGNC:40814 | PDZRN3-AS1   | 3p13     |                              | 101927249 | ENSG00000239677 |                              |           |
| HGNC:35127 | PEG3-AS1     | 19q13.43 |                              | 100169890 |                 | 18166281, 15950772,          | NR_023847 |
| HGNC:19969 | PEG13        | 8q24.3   | AK307073                     |           | ENSG00000282164 | 24402520, 24667089, 24980697 |           |
| HGNC:41251 | PEX5L-AS1    | 3q26.33  |                              |           | ENSG00000243799 |                              |           |
| HGNC:41252 | PEX5L-AS2    | 3q26.33  |                              | 101928790 | ENSG00000244302 |                              | NR_110059 |
| HGNC:44181 | PGM5-AS1     | 9q21.11  | AY343894                     | 572558    | ENSG00000224958 |                              | NR_015423 |
| HGNC:51194 | PGM5P3-AS1   | 9p24.3   |                              | 101929127 | ENSG00000277631 |                              | NR_121188 |
| HGNC:51195 | PGM5P4-AS1   | 2q14.1   |                              | 103344932 | ENSG00000231943 |                              | NR_121185 |
| HGNC:40943 | PHACTR2-AS1  | 6q24.2   |                              | 285740    | ENSG00000235740 |                              | NR_027114 |
| HGNC:40445 | PHEX-AS1     | Xp22.11  |                              |           | ENSG00000224204 |                              |           |
| HGNC:40446 | PHKA1-AS1    | Xq13.2   |                              | 100506671 | ENSG00000231944 |                              |           |
| HGNC:44110 | PHKA2-AS1    | Xp22.13  | BC073810                     | 100132163 | ENSG00000237836 |                              | NR_029379 |
| HGNC:19725 | PICRAR       | 21q22.3  | BC027456                     | 378825    | ENSG00000275874 | 16826516, 27049681           |           |
| HGNC:32346 | PIK3CD-AS1   | 1p36.22  | BC016063                     | 644997    | ENSG00000179840 |                              | NR_027045 |
| HGNC:51334 | PIK3CD-AS2   | 1p36.22  | AL523099, BI763597, B        | 101929074 | ENSG00000231789 |                              |           |
| HGNC:41072 | PIK3IP1-AS1  | 22q12.2  | BF439736                     | 101929760 | ENSG00000228839 |                              | NR_110542 |
| HGNC:38872 | PINK1-AS     | 1p36.12  | AK090466                     |           | ENSG00000117242 | 17362513                     |           |
| HGNC:16671 | PISR1        | 3q23     | AW268472                     | 140464    |                 |                              | NR_027070 |
| HGNC:44116 | PITPNA-AS1   | 17p13.3  | HY016432, DB053306,          | 100306951 | ENSG00000236618 |                              | NR_028514 |
| HGNC:44675 | PITRM1-AS1   | 10p15.2  | BC050332                     | 100507034 | ENSG00000237399 |                              | NR_038284 |
| HGNC:51659 | PKIA-AS1     | 8q21.13  | BC036404                     | 101927003 | ENSG00000254266 |                              | NR_125389 |
| HGNC:50597 | PKN2-AS1     | 1p22.2   |                              | 101927891 | ENSG00000237505 |                              |           |
| HGNC:50690 | PKNOX2-AS1   | 11q24.2  | BP872841                     |           | ENSG00000254880 |                              |           |
| HGNC:51585 | PLA2G4C-AS1  | 19q13.33 | AA318256, BU736556, EL953961 |           | ENSG00000269420 |                              |           |
| HGNC:51419 | PLA2G4E-AS1  | 15q15.1  | BC043275                     | 101928388 | ENSG00000246740 |                              | NR_120334 |
| HGNC:51143 | PLBD1-AS1    | 12p13.1  |                              | 101928290 | ENSG00000256751 |                              |           |
| HGNC:41414 | PLCB1-IT1    | 20p12.3  |                              |           | ENSG00000225479 |                              |           |
| HGNC:43662 | PLCB2-AS1    | 15q15.1  |                              |           | ENSG00000259307 |                              |           |
| HGNC:45193 | PLCE1-AS1    | 10q23.33 |                              | 100128054 | ENSG00000268894 |                              | NR_033969 |
| HGNC:51206 | PLCE1-AS2    | 10q23.33 | AK098548                     | 101927049 | ENSG00000232913 |                              | NR_120615 |
| HGNC:40450 | PLCG1-AS1    | 20q12    |                              | 101927117 | ENSG00000226648 |                              |           |
| HGNC:41231 | PLCH1-AS1    | 3q25.31  |                              |           | ENSG00000239508 |                              |           |
| HGNC:41232 | PLCH1-AS2    | 3q25.31  |                              |           | ENSG00000242925 |                              |           |
| HGNC:40449 | PLCL2-AS1    | 3p24.3   |                              |           | ENSG00000226441 |                              |           |
| HGNC:41145 | PLCXD2-AS1   | 3q13.2   |                              |           | ENSG00000240766 |                              |           |
| HGNC:40451 | PLS1-AS1     | 3q23     |                              |           | ENSG00000239641 |                              |           |
| HGNC:50343 | PLS3-AS1     | Xq23     |                              | 101927352 | ENSG00000271826 |                              |           |
| HGNC:40907 | PLSCR5-AS1   | 3q24     |                              |           | ENSG00000241457 |                              |           |
| HGNC:49459 | POT1-AS1     | 7q31.33  | BX648695                     |           | ENSG00000224897 |                              |           |
| HGNC:40058 | POTEH-AS1    | 22q11.1  | AY338953                     |           | ENSG00000236666 |                              |           |
| HGNC:40979 | POU6F2-AS1   | 7p14.1   | AI807878, BX113391           |           | ENSG00000224122 |                              |           |
| HGNC:21887 | POU6F2-AS2   | 7p14.1   | AK023033                     |           | ENSG00000233854 |                              |           |
| HGNC:40463 | PPEF1-AS1    | Xp22.13  |                              |           | ENSG00000237221 |                              |           |
| HGNC:48717 | PPP1R26-AS1  | 9q34.3   |                              | 100506599 | ENSG00000225361 |                              |           |
| HGNC:42984 | PPP2R2B-IT1  | 5q32     |                              |           | ENSG00000249553 |                              |           |
| HGNC:50750 | PPP3CB-AS1   | 10q22.2  |                              | 101929145 | ENSG00000221817 |                              |           |
| HGNC:51112 | PPP4R1-AS1   | 18p11.22 |                              | 101927323 | ENSG00000263627 |                              |           |
| HGNC:48587 | PRC1-AS1     | 15q26.1  |                              | 100507118 | ENSG00000258725 |                              |           |
| HGNC:40916 | PRICKLE2-AS1 | 3p14.1   |                              | 100652759 | ENSG00000241572 |                              |           |
| HGNC:40917 | PRICKLE2-AS2 | 3p14.1   |                              |           | ENSG00000241101 |                              |           |
| HGNC:40918 | PRICKLE2-AS3 | 3p14.1   |                              |           | ENSG00000226017 |                              |           |
| HGNC:34235 | PRINS        | 10p12.1  | AK022045                     | 100169750 |                 | 15855153, 20377629,          | NR_023388 |
| HGNC:40468 | PRKAG2-AS1   | 7q36.1   | BC131560                     | 100505483 | ENSG00000239911 |                              | NR_038926 |
| HGNC:40471 | PRKAR2A-AS1  | 3p21.31  |                              | 100506637 | ENSG00000224424 |                              |           |

|            |              |          |                     |           |                 |                            |           |
|------------|--------------|----------|---------------------|-----------|-----------------|----------------------------|-----------|
| HGNC:51347 | PRKCA-AS1    | 17q24.2  | BC033554            | 101928001 | ENSG00000264630 |                            | NR_110822 |
| HGNC:44689 | PRKCQ-AS1    | 10p14    |                     | 439949    | ENSG00000237943 | 26421281                   | NR_036502 |
| HGNC:45029 | PRKG1-AS1    | 10q21.1  | BC039504            | 100506939 | ENSG00000236671 |                            | NR_038277 |
| HGNC:40479 | PRKX-AS1     | Xp22.33  |                     |           | ENSG00000236188 |                            |           |
| HGNC:40533 | PRMT5-AS1    | 14q11.2  | AK093277            | 100505758 | ENSG00000237054 |                            |           |
| HGNC:48942 | PRNCR1       | 8q24.21  | AB458446            | 101867536 |                 | 20874843, 23945587,        | NR_109833 |
| HGNC:27343 | PROSER2-AS1  | 10p14    |                     | 219731    | ENSG00000225778 |                            | NR_038222 |
| HGNC:43656 | PROX1-AS1    | 1q32.3   | AK092251            | 100505832 | ENSG00000230461 |                            | NR_037850 |
| HGNC:27961 | PRR7-AS1     | 5q35.3   | BC041422            | 340037    | ENSG00000246334 | 12477932                   | NR_038915 |
| HGNC:51822 | PRR29-AS1    | 17q23.3  | AK094767            | 400612    | ENSG00000264954 |                            | NR_126169 |
| HGNC:50499 | PRR34-AS1    | 22q13.31 |                     | 150381    | ENSG00000241990 |                            |           |
| HGNC:41151 | PRRT3-AS1    | 3p25.3   |                     |           | ENSG00000230082 |                            |           |
| HGNC:50684 | PRRX2-AS1    | 9q34.11  |                     | 101929437 | ENSG00000236024 |                            |           |
| HGNC:26445 | PSMA3-AS1    | 14q23.1  |                     | 379025    | ENSG00000257621 | 25392693                   | NR_029434 |
| HGNC:39758 | PSMB8-AS1    | 6p21.32  |                     | 100507463 | ENSG00000204261 |                            | NR_037173 |
| HGNC:27367 | PSMD5-AS1    | 9q33.2   |                     | 253039    | ENSG00000226752 | 12477932                   |           |
| HGNC:44125 | PSMD6-AS2    | 3p14.1   | AK023371            | 100507062 | ENSG00000239653 |                            | NR_038286 |
| HGNC:22230 | PSMG3-AS1    | 7p22.3   |                     | 114796    | ENSG00000230487 |                            | NR_021487 |
| HGNC:17203 | PSORS1C3     | 6p21.33  |                     | 100130889 | ENSG00000204528 |                            | NR_026816 |
| HGNC:37703 | PTCHD1-AS    | Xp22.11  | DA355362, BX115199  | 100873065 | ENSG00000233067 |                            | NR_073010 |
| HGNC:37127 | PTCSC1       | 8q24     | AK023948            | 100302522 |                 | 19147577                   |           |
| HGNC:44086 | PTCSC2       | 9q22.33  | HG502283, BE073442  | 101928337 | ENSG00000236130 | 23408906, 25303483         |           |
| HGNC:43959 | PTCSC3       | 14q13.3  | JN689234, CB987890  | 100886964 | ENSG00000259104 | 22586128, 26274343         | NR_049735 |
| HGNC:48773 | PTENP1-AS    | 9p13.3   | BX374997            |           |                 | 23435381                   |           |
| HGNC:48711 | PTGES2-AS1   | 9q34.11  | BC141829, BC151210  | 389791    |                 |                            |           |
| HGNC:44174 | PTOV1-AS1    | 19q13.33 | BC043359            | 100506033 |                 |                            | NR_040037 |
| HGNC:51284 | PTOV1-AS2    | 19q13.33 |                     | 101928378 | ENSG00000269352 |                            | NR_110730 |
| HGNC:49753 | PTPRD-AS1    | 9p24.1   | AK094342            | 101929407 | ENSG00000225706 |                            |           |
| HGNC:49754 | PTPRD-AS2    | 9p23     | BC045688            | 101929428 | ENSG00000226717 |                            |           |
| HGNC:44638 | PTPRG-AS1    | 3p14.2   | AK308660, BC041886  | 100506994 | ENSG00000241472 |                            | NR_038281 |
| HGNC:50634 | PTPRJ-AS1    | 11p11.2  | AI365468            |           | ENSG00000254879 | 23840844                   |           |
| HGNC:40813 | PVRL3-AS1    | 3q13.13  |                     | 100506555 | ENSG00000242242 |                            |           |
| HGNC:9709  | PVT1         | 8q24     | M31519              | 5820      | ENSG00000249859 | 17503467, 23801869         | NR_003367 |
| HGNC:30089 | PWAR1        | 15q11.2  |                     | 145624    |                 | 7987392, 9477342           |           |
| HGNC:29998 | PWAR4        | 15q11.2  |                     | 347745    |                 | 11106375, 7987392          |           |
| HGNC:30090 | PWAR5        | 15q11.2  |                     | 8123      |                 | 7987392, 9477342, 23726844 |           |
| HGNC:49129 | PWAR6        | 15q11.2  | BC043194, AK096584  | 100506965 | ENSG00000257151 |                            |           |
| HGNC:30001 | PWARSN       | 15q11.2  |                     | 347746    |                 | 12210318, 8858349          | NR_022011 |
| HGNC:33235 | PWRN1        | 15q11.2  | AC139362, AC139147, | 791114    | ENSG00000259905 | 17337158                   | NR_026646 |
| HGNC:33236 | PWRN2        | 15q11.2  | AC087474            | 791115    |                 | 17337158                   | NR_026647 |
| HGNC:49131 | PWRN3        | 15q11.2  | AA412395, DB060889  | 101928840 | ENSG00000260760 |                            |           |
| HGNC:49130 | PWRN4        | 15q11.2  | CK820921, BI712798  |           | ENSG00000260232 |                            |           |
| HGNC:44123 | PXN-AS1      | 12q24.23 |                     | 100506649 | ENSG00000255857 |                            | NR_038924 |
| HGNC:45036 | PYCARD-AS1   | 16p11.2  |                     | 100652740 | ENSG00000261359 |                            | NR_102400 |
| HGNC:49278 | RAB6C-AS1    | 2q21.1   |                     | 100131320 | ENSG00000225449 |                            |           |
| HGNC:44178 | RAB11B-AS1   | 19p13.2  | BC014506            | 100507567 |                 |                            | NR_038237 |
| HGNC:48672 | RAB30-AS1    | 11q14.1  |                     | 100506233 | ENSG00000246067 |                            |           |
| HGNC:41471 | RABGAP1L-IT1 | 1q25.1   |                     |           | ENSG00000223525 |                            |           |
| HGNC:32158 | RAD21-AS1    | 8q24.11  | BC031280            | 644660    | ENSG00000253327 |                            | XR_040079 |
| HGNC:48621 | RAD51-AS1    | 15q15.1  | AK125393            | 100505648 | ENSG00000245849 | 26230935                   | NR_040058 |
| HGNC:48994 | RAET1E-AS1   | 6q25.1   |                     | 100652739 | ENSG00000223701 |                            |           |
| HGNC:40496 | RAI1-AS1     | 17p11.2  | BX366317, BX401587  |           | ENSG00000237328 |                            |           |
| HGNC:50743 | RALY-AS1     | 20q11.22 |                     | 101926888 | ENSG00000228265 |                            |           |
| HGNC:44358 | RAMP2-AS1    | 17q21.31 | BC018638, BC041021  | 100190938 | ENSG00000197291 |                            | NR_024461 |

|            |              |          |                    |           |                 |                    |           |
|------------|--------------|----------|--------------------|-----------|-----------------|--------------------|-----------|
| HGNC:40957 | RAP2C-AS1    | Xq26.2   |                    | 101928578 | ENSG00000232160 |                    |           |
| HGNC:28081 | RAPGEF4-AS1  | 2q31.1   | AL157450           | 91149     | ENSG00000228016 |                    | NR_026995 |
| HGNC:49577 | RARA-AS1     | 17q21.2  | BC038432           | 101929693 | ENSG00000265666 |                    |           |
| HGNC:41376 | RASA2-IT1    | 3q23     |                    |           | ENSG00000250170 |                    |           |
| HGNC:39938 | RASA3-IT1    | 13q34    |                    |           | ENSG00000232487 |                    |           |
| HGNC:44170 | RASAL2-AS1   | 1q25.2   | BC027927           | 100302401 | ENSG00000224687 |                    | NR_027982 |
| HGNC:40499 | RASGRF2-AS1  | 5q14.1   | BM682385           | 102524628 | ENSG00000251450 |                    |           |
| HGNC:49091 | RASSF1-AS1   | 3p21.3   | KC330992           | 102060282 |                 | 23990798           | NR_109831 |
| HGNC:48637 | RASSF8-AS1   | 12p12.1  |                    | 100506451 | ENSG00000246695 |                    |           |
| HGNC:33770 | RBAKDN       | 7p22.1   | BC031661           | 389458    |                 |                    | NR_015343 |
| HGNC:48591 | RBFADN       | 18q23    |                    | 100506070 |                 |                    | NR_103445 |
| HGNC:48871 | RBM5-AS1     | 3p21.31  | EF470865           | 100775107 |                 | 10949932, 19559772 | NR_045388 |
| HGNC:28818 | RBM12B-AS1   | 8q22.1   | AF116672           | 55472     | ENSG00000279331 |                    | NR_027259 |
| HGNC:39805 | RBM26-AS1    | 13q31.1  | BC034812           | 100505538 | ENSG00000227354 |                    |           |
| HGNC:39987 | RBMS3-AS1    | 3p24.1   |                    |           | ENSG00000235593 |                    |           |
| HGNC:39988 | RBMS3-AS2    | 3p24.1   |                    |           | ENSG00000203506 |                    |           |
| HGNC:39989 | RBMS3-AS3    | 3p24.1   |                    |           | ENSG00000235904 |                    |           |
| HGNC:48721 | RPMS-AS1     | 8p12     |                    | 100128750 | ENSG00000254109 |                    |           |
| HGNC:41496 | RC3H1-IT1    | 1q25.1   |                    |           | ENSG00000236535 |                    |           |
| HGNC:51658 | RDH10-AS1    | 8q21.11  |                    | 101926926 | ENSG00000250295 |                    | NR_125388 |
| HGNC:39990 | RERG-AS1     | 12p12.3  | BF508473, AW197661 |           | ENSG00000255660 |                    |           |
| HGNC:39991 | RERG-IT1     | 12p12.3  |                    |           | ENSG00000256650 |                    |           |
| HGNC:41377 | REV3L-IT1    | 6q21     |                    |           | ENSG00000229276 |                    |           |
| HGNC:9978  | RFPL1S       | 22q12    | AJ010230           | 10740     | ENSG00000225465 | 10508838           | NR_002727 |
| HGNC:51197 | RFX3-AS1     | 9p24.2   | BG720696           | 101929302 | ENSG00000232104 |                    | NR_121586 |
| HGNC:48666 | RGMB-AS1     | 5q15     |                    | 503569    | ENSG00000246763 | 26055877           | NR_033932 |
| HGNC:49273 | RGPD4-AS1    | 2q12.3   |                    | 729121    | ENSG00000230651 |                    |           |
| HGNC:41308 | RHOA-IT1     | 3p21.31  |                    |           | ENSG00000235908 |                    |           |
| HGNC:51582 | RHOXF1-AS1   | Xq24     | AK123976           | 101928969 | ENSG00000258545 |                    |           |
| HGNC:28457 | RHPN1-AS1    | 8q24     |                    | 78998     | ENSG00000254389 | 12477932           | NR_026785 |
| HGNC:41150 | RMDN2-AS1    | 2p22.2   | DB142860           |           | ENSG00000235848 |                    |           |
| HGNC:29893 | RMST         | 12q23.1  | AK056164           | 196475    | ENSG00000255794 | 12082533, 20062813 | NR_024037 |
| HGNC:49289 | RNASEH1-AS1  | 2p25.3   |                    | 100506054 | ENSG00000234171 |                    |           |
| HGNC:39967 | RNASEH2B-AS1 | 13q14.3  |                    |           | ENSG00000233672 |                    |           |
| HGNC:48940 | RNF139-AS1   | 8q24.13  | AA905116           | 101927612 | ENSG00000245149 |                    | NR_108047 |
| HGNC:30963 | RNF144A-AS1  | 2p25.2   |                    | 386597    | ENSG00000228203 |                    | NR_033997 |
| HGNC:44127 | RNF157-AS1   | 17q25.1  | AK093500           | 100507218 |                 |                    | NR_040017 |
| HGNC:41161 | RNF185-AS1   | 22q12.2  | BC069286           |           | ENSG00000254835 |                    |           |
| HGNC:41463 | RNF216-IT1   | 7p22.1   |                    |           | ENSG00000237738 |                    |           |
| HGNC:50866 | RNF217-AS1   | 6q22.31  |                    | 7955      | ENSG00000236548 | 9087565            |           |
| HGNC:42700 | RNF219-AS1   | 13q31.1  |                    | 100874222 | ENSG00000234377 |                    |           |
| HGNC:39984 | ROPN1L-AS1   | 5p15.2   |                    | 100505845 | ENSG00000250600 |                    |           |
| HGNC:40508 | ROR1-AS1     | 1p31.3   |                    | 101927034 | ENSG00000223949 |                    |           |
| HGNC:51410 | RORA-AS1     | 15q22.2  | BC035094           | 101928784 | ENSG00000245534 |                    | NR_120339 |
| HGNC:51411 | RORA-AS2     | 15q22.2  | DB058680, DB033761 | 100996876 | ENSG00000259482 |                    | NR_120318 |
| HGNC:49803 | RORB-AS1     | 9q21.13  | BI520565           |           | ENSG00000224825 |                    |           |
| HGNC:45238 | RPARP-AS1    | 10q24.32 |                    | 100505761 | ENSG00000269609 |                    | NR_038937 |
| HGNC:26749 | RPL34-AS1    | 4q25     |                    | 285456    | ENSG00000234492 | 24908062           |           |
| HGNC:40511 | RPS6KA2-AS1  | 6q27     | AA707471, AW290888 | 100861523 | ENSG00000231654 | 19287968           |           |
| HGNC:41378 | RPS6KA2-IT1  | 6q27     |                    |           | ENSG00000232082 |                    |           |
| HGNC:40512 | RRM1-AS1     | 11p15.4  |                    |           | ENSG00000255276 |                    |           |
| HGNC:50465 | RRS1-AS1     | 8q13.1   |                    | 100505676 | ENSG00000246145 |                    |           |
| HGNC:41439 | RSF1-IT1     | 11q14.1  |                    |           | ENSG00000255409 |                    |           |
| HGNC:41438 | RSF1-IT2     | 11q14.1  |                    |           | ENSG00000254985 |                    |           |

|            |              |          |                     |           |                 |                    |           |
|------------|--------------|----------|---------------------|-----------|-----------------|--------------------|-----------|
| HGNC:50573 | RTCA-AS1     | 1p21.2   |                     | 100506007 | ENSG00000224616 |                    |           |
| HGNC:51344 | RUNDC3A-AS1  | 17q21.31 | AK055254, BC051705  | 101926996 | ENSG00000267750 |                    | NR_110802 |
| HGNC:16623 | RUNX1-IT1    | 21q22.12 | AK024509            | 80215     |                 |                    | NR_026812 |
| HGNC:26680 | RUSC1-AS1    | 1q22     | AK093295            | 284618    | ENSG00000225855 | 14702039           |           |
| HGNC:40514 | RUVBL1-AS1   | 3q21.3   |                     |           | ENSG00000239608 |                    |           |
| HGNC:39835 | SACS-AS1     | 13q12.12 |                     | 100506680 | ENSG00000229558 |                    |           |
| HGNC:49001 | SALRNA1      | 14q23.1  |                     |           |                 | 23758631           |           |
| HGNC:49003 | SALRNA2      | 15q23    |                     |           |                 | 23758631           |           |
| HGNC:49002 | SALRNA3      | 15q23    |                     |           |                 | 23758631           |           |
| HGNC:30937 | SAMD12-AS1   | 8q24.12  | BE069098            | 552860    |                 |                    |           |
| HGNC:49644 | SAMMSON      | 3p13     |                     | 101927152 | ENSG00000240405 | 27008969           | NR_110000 |
| HGNC:39599 | SAMSN1-AS1   | 21q11.2  |                     |           | ENSG00000223662 |                    |           |
| HGNC:26760 | SAP30L-AS1   | 5q33.2   |                     | 386627    | ENSG00000245275 | 12477932           |           |
| HGNC:39824 | SAPCD1-AS1   | 6p21.33  |                     |           | ENSG00000235663 |                    |           |
| HGNC:50687 | SATB1-AS1    | 3p24.3   | DR006704            |           | ENSG00000228956 |                    |           |
| HGNC:26490 | SATB2-AS1    | 2q33.1   |                     | 150538    | ENSG00000225953 |                    | NR_026830 |
| HGNC:27438 | SBF2-AS1     | 11p15.4  |                     | 283104    | ENSG00000246273 |                    | NR_036485 |
| HGNC:43718 | SCAANT1      | 3p14.1   | BU569004            | 100861563 |                 | 21689595           |           |
| HGNC:50544 | SCAMP1-AS1   | 5q14.1   |                     | 728769    | ENSG00000245556 |                    |           |
| HGNC:39895 | SCEL-AS1     | 13q22.3  |                     |           | ENSG00000224347 |                    |           |
| HGNC:48603 | SCHLAP1      | 2q31.3   | JX117418            | 101669767 |                 | 24076601, 24165726 | NR_104323 |
| HGNC:50601 | SCOC-AS1     | 4q31.1   |                     | 100129858 | ENSG00000196951 |                    |           |
| HGNC:44314 | SDCBP2-AS1   | 20p13    | BC034773, DA094549, | 100507495 | ENSG00000234684 |                    | NR_040047 |
| HGNC:44003 | SEC24B-AS1   | 4q25     | BC009800            | 100533182 | ENSG00000247950 | 21307942           | NR_039978 |
| HGNC:40586 | SEC62-AS1    | 3q26.2   |                     |           | ENSG00000240373 |                    |           |
| HGNC:49096 | SEMA3B-AS1   | 3p21.31  |                     | 101928931 | ENSG00000232352 |                    |           |
| HGNC:40518 | SEMA3F-AS1   | 3p21.31  | AK125500            | 100129060 | ENSG00000235016 |                    |           |
| HGNC:51110 | SEMA6A-AS1   | 5q23.1   |                     | 101927233 | ENSG00000248445 |                    |           |
| HGNC:44177 | SENCR        | 11q24.3  | BC039676            | 100507392 | ENSG00000254703 | 24578380           | NR_038908 |
| HGNC:27737 | SEPSECS-AS1  | 4p15.2   | AK095450            | 285540    |                 |                    | NR_037934 |
| HGNC:51345 | SEPT4-AS1    | 17q22    | CK429595, BX092197, | 101927688 | ENSG00000264672 |                    | NR_110810 |
| HGNC:51153 | SEPT7-AS1    | 7p14.2   |                     | 101928545 | ENSG00000228878 |                    |           |
| HGNC:32019 | SERTAD4-AS1  | 1q32.2   | BC066352            | 574036    | ENSG00000203706 |                    | NR_024337 |
| HGNC:51589 | SFTPD-AS1    | 10q22.3  | AK124605            |           | ENSG00000273372 |                    |           |
| HGNC:49683 | SGMS1-AS1    | 10q11.23 |                     |           | ENSG00000226200 | 24495672           |           |
| HGNC:41081 | SGO1-AS1     | 3p24.3   |                     |           | ENSG00000237485 |                    |           |
| HGNC:44501 | SH3BP5-AS1   | 3p25.1   |                     | 100505696 | ENSG00000224660 |                    | NR_046084 |
| HGNC:45242 | SH3PXD2A-AS1 | 10q24.33 | AK056784            | 100505839 |                 |                    | NR_038940 |
| HGNC:44168 | SH3RF3-AS1   | 2q12.3   |                     | 100287216 | ENSG00000259863 |                    | NR_029193 |
| HGNC:40014 | SHANK2-AS1   | 11q13.4  |                     |           | ENSG00000226627 |                    |           |
| HGNC:40015 | SHANK2-AS2   | 11q13.4  |                     |           | ENSG00000236262 |                    |           |
| HGNC:25098 | SHANK2-AS3   | 11q13.4  | BC004224            | 220070    | ENSG00000171671 | 12477932           |           |
| HGNC:40526 | SHAH2-AS1    | 3q25.1   |                     |           | ENSG00000244265 |                    |           |
| HGNC:41126 | SIDT1-AS1    | 3q13.2   |                     |           | ENSG00000239453 |                    |           |
| HGNC:41495 | SIK3-IT1     | 11q23.3  |                     |           | ENSG00000231865 |                    |           |
| HGNC:51229 | SIRPG-AS1    | 20p13    | AK093519            | 101929010 | ENSG00000237914 |                    | NR_110090 |
| HGNC:51912 | SIRT1-AS     | 10q21.3  |                     |           |                 | 26324025           |           |
| HGNC:40532 | SIX3-AS1     | 2p21     | BM690547, BM663835  | 100506108 | ENSG00000236502 |                    |           |
| HGNC:44187 | SLC2A1-AS1   | 1p34.2   | AK056786            | 440584    | ENSG00000227533 |                    | NR_033967 |
| HGNC:40546 | SLC6A1-AS1   | 3p25.3   |                     |           | ENSG00000232287 |                    |           |
| HGNC:44064 | SLC7A11-AS1  | 4q28.3   |                     | 641364    | ENSG00000250033 |                    | NR_038380 |
| HGNC:44102 | SLC8A1-AS1   | 2p22.1   |                     | 100128590 | ENSG00000227028 |                    |           |
| HGNC:40928 | SLC9A9-AS1   | 3q24     |                     |           | ENSG00000240012 |                    |           |
| HGNC:40929 | SLC9A9-AS2   | 3q24     |                     |           | ENSG00000244493 |                    |           |

|            |              |          |                       |           |                 |                      |             |
|------------|--------------|----------|-----------------------|-----------|-----------------|----------------------|-------------|
| HGNC:51125 | SLC14A2-AS1  | 18q12.3  |                       | 101927980 | ENSG00000267097 |                      |             |
| HGNC:49445 | SLC16A1-AS1  | 1p13.2   |                       | 100506392 | ENSG00000226419 |                      |             |
| HGNC:51205 | SLC16A12-AS1 | 10q23.31 |                       | 101926906 | ENSG00000234452 |                      | NR_120614   |
| HGNC:43438 | SLC25A5-AS1  | Xq24     |                       | 100303728 | ENSG00000224281 |                      | NR_028443   |
| HGNC:44298 | SLC25A21-AS1 | 14q13.3  |                       | 100129794 | ENSG00000258708 |                      |             |
| HGNC:27844 | SLC25A25-AS1 | 9q34.11  | AL833509, BU623777,   | 100289019 | ENSG00000234771 |                      | NR_033374   |
| HGNC:42795 | SLC25A30-AS1 | 13q14.13 |                       |           | ENSG00000251015 |                      |             |
| HGNC:22385 | SLC26A4-AS1  | 7q22.3   | BC037315              | 286002    | ENSG00000233705 |                      | NR_028137   |
| HGNC:44881 | SLC39A12-AS1 | 10p12.33 |                       | 100129213 | ENSG00000226083 |                      | NM_00114519 |
| HGNC:40537 | SLCO4A1-AS1  | 20q13.33 |                       | 100127888 | ENSG00000232803 |                      |             |
| HGNC:44126 | SLFNL1-AS1   | 1p34.2   | AL157461              | 100507178 |                 |                      | NR_037868   |
| HGNC:51198 | SLIT1-AS1    | 10q24.1  |                       | 100505540 | ENSG00000234855 |                      | NR_038330   |
| HGNC:41383 | SLIT2-IT1    | 4p15.31  |                       | 100505893 | ENSG00000248228 |                      |             |
| HGNC:49379 | SMAD1-AS1    | 4q31.21  | AW087665              |           | ENSG00000250902 | 24147006             |             |
| HGNC:49381 | SMAD1-AS2    | 4q31.21  | BC042377              | 101927659 | ENSG00000250582 |                      |             |
| HGNC:30586 | SMAD5-AS1    | 5q31.1   | AF086556              | 9597      | ENSG00000164621 | 10049768             |             |
| HGNC:39963 | SMAD9-IT1    | 13q13.3  |                       |           | ENSG00000236711 |                      |             |
| HGNC:39982 | SMARCA5-AS1  | 4q31.21  |                       | 100128055 | ENSG00000245112 |                      |             |
| HGNC:50827 | SMC2-AS1     | 9q31.1   |                       | 101928550 | ENSG00000270332 |                      |             |
| HGNC:48718 | SMC5-AS1     | 9q21.12  |                       | 100507299 | ENSG00000268364 |                      |             |
| HGNC:17914 | SMCR2        | 17p11.2  | AI821758              | 105371564 | ENSG00000223979 | 11997338             | NR_131243   |
| HGNC:17918 | SMCR5        | 17p11.2  |                       | 140771    |                 | 11997338             | NR_024007   |
| HGNC:17919 | SMCR6        | 17p11.2  | AJ230805, BF511382, V | 140772    |                 | 11997338             |             |
| HGNC:1220  | SMG6-IT1     | 17p13.3  | AJ276246              | 53400     |                 |                      |             |
| HGNC:24518 | SMG7-AS1     | 1q25.3   | BC032873              | 284649    | ENSG00000232860 | 12477932             | NR_040063   |
| HGNC:42674 | SMIM2-AS1    | 13q14.11 |                       | 101929212 | ENSG00000227258 |                      |             |
| HGNC:41492 | SMIM2-IT1    | 13q14.11 | AI476676              | 100874377 | ENSG00000235285 |                      |             |
| HGNC:41406 | SMYD3-IT1    | 1q44     |                       |           | ENSG00000230184 |                      |             |
| HGNC:28327 | SNAI3-AS1    | 16q24.3  |                       | 197187    | ENSG00000260630 | 12477932             |             |
| HGNC:44312 | SNAP25-AS1   | 20p12.2  | AK124961, BF244758,   | 100131208 | ENSG00000227906 |                      | NR_040710   |
| HGNC:41501 | SNAP47-AS1   | 1q42.13  | AK057311              |           | ENSG00000230005 |                      |             |
| HGNC:50600 | SNCA-AS1     | 4q22.1   |                       | 644248    | ENSG00000247775 |                      |             |
| HGNC:24158 | SND1-IT1     | 7q32.1   | AF191492              | 27099     |                 |                      | NR_027330   |
| HGNC:32688 | SNHG1        | 11q12.3  | L36588                | 23642     | ENSG00000255717 | 8559254, 23801869, 2 | NR_003098   |
| HGNC:10118 | SNHG3        | 1p35.3   | AJ006834              | 8420      | ENSG00000242125 | 9671460              | NR_002909.1 |
| HGNC:32964 | SNHG4        | 5q31.2   |                       | 724102    |                 | 9630250              | NR_003141   |
| HGNC:21026 | SNHG5        | 6q14.3   | BC009220              | 387066    | ENSG00000203875 | 10792466             | NR_003038   |
| HGNC:32965 | SNHG6        | 8q13     | AY264285              | 641638    | ENSG00000245910 | 16226852             | NR_002599   |
| HGNC:28254 | SNHG7        | 9q34.3   | CR599965, BC042369    | 84973     | ENSG00000233016 | 12477932             | NR_003672   |
| HGNC:33098 | SNHG8        | 4q26     | BC017993, CR625561,   | 100093630 | ENSG00000269893 | 15199136             | NR_003584   |
| HGNC:33102 | SNHG9        | 16p13.3  | CR749453, BC028232    | 735301    | ENSG00000255198 |                      | NR_003142   |
| HGNC:27510 | SNHG10       | 14q32.13 |                       | 283596    | ENSG00000247092 | 12477932             | NR_001459   |
| HGNC:25046 | SNHG11       | 20q11.23 | AF497716              | 128439    | ENSG00000174365 | 12477932             | NR_003239   |
| HGNC:30062 | SNHG12       | 1p35.3   | AF277181, KJ782215    | 85028     | ENSG00000197989 | 25695231             | NR_024127   |
| HGNC:37462 | SNHG14       | 15q11.2  |                       |           | ENSG00000224078 | 23771028             |             |
| HGNC:27797 | SNHG15       | 7p13     | BC092459, AK096179    | 285958    | ENSG00000232956 | 14702039, 24036268   | NR_003697   |
| HGNC:44352 | SNHG16       | 17q25.1  | BC042949, BC100293,   | 100507246 | ENSG00000163597 | 19287950, 21147498,  | NR_038108   |
| HGNC:48600 | SNHG17       | 20q11.23 | BC032119, BC052370    | 388796    | ENSG00000196756 |                      | NR_015366   |
| HGNC:49007 | SNHG18       | 5p15.31  |                       | 100505806 | ENSG00000250786 |                      | NR_045196   |
| HGNC:49574 | SNHG19       | 16p13.3  |                       | 100507303 | ENSG00000260260 |                      |             |
| HGNC:33099 | SNHG20       | 17q25.2  | AF130050              | 654434    | ENSG00000234912 | 16373490             |             |
| HGNC:50284 | SNHG21       | 15q25.2  | AA284521, BX112407    | 100505616 | ENSG00000250988 |                      | NR_110096   |
| HGNC:50285 | SNHG22       | 18q21.1  | AK123464              | 103091864 | ENSG00000267322 |                      | NR_117096   |
| HGNC:50622 | SNHG23       | 14q32.31 | BX508291              | 100507242 | ENSG00000225746 |                      |             |

|            |             |           |                     |           |                 |                    |           |
|------------|-------------|-----------|---------------------|-----------|-----------------|--------------------|-----------|
| HGNC:50825 | SNHG24      | 14q32.31  |                     | 101929369 | ENSG00000271417 |                    | NR_110178 |
| HGNC:51534 | SNHG25      | 17q23.3   |                     |           | ENSG00000266402 |                    |           |
| HGNC:41269 | SNRK-AS1    | 3p22.1    |                     |           | ENSG00000234617 |                    |           |
| HGNC:27054 | SOCS2-AS1   | 12q22     |                     | 144481    | ENSG00000246985 | 24168098           | NR_038263 |
| HGNC:45244 | SORCS3-AS1  | 10q25.1   | BC042079            | 100505890 | ENSG00000226387 |                    |           |
| HGNC:41385 | SOS1-IT1    | 2p22.1    |                     | 100505911 | ENSG00000229692 |                    |           |
| HGNC:20209 | SOX2-OT     | 3q26.33   | AL157425, AK022826  | 347689    | ENSG00000242808 | 12612584, 19767420 | NR_004053 |
| HGNC:49321 | SOX9-AS1    | 17q24.3   |                     | 400618    | ENSG00000234899 |                    |           |
| HGNC:39807 | SOX21-AS1   | 13q32.1   |                     | 100507533 | ENSG00000227640 | 25959816           | NR_046514 |
| HGNC:51341 | SP2-AS1     | 17q21.32  | BC038442, BF673352, | 100506325 | ENSG00000234494 |                    | NR_103856 |
| HGNC:49383 | SPACA6P-AS  | 19q13.41  | AK125996            |           | ENSG00000269959 |                    |           |
| HGNC:41140 | SPAG5-AS1   | 17q11.2   |                     | 100506436 | ENSG00000227543 |                    | NR_040012 |
| HGNC:31683 | SPANXA2-OT1 | Xq27.2    | AK093505            | 619455    | ENSG00000277215 |                    | NR_037183 |
| HGNC:28013 | SPATA3-AS1  | 2q37.1    |                     | 348761    | ENSG00000238062 | 12477932           |           |
| HGNC:48627 | SPATA8-AS1  | 15q26.2   |                     | 100652749 | ENSG00000259282 |                    |           |
| HGNC:39905 | SPATA13-AS1 | 13q12.12  |                     |           | ENSG00000227213 |                    |           |
| HGNC:41086 | SPATA17-AS1 | 1q41      | AI025201            |           | ENSG00000234070 |                    |           |
| HGNC:48613 | SPATA41     | 15q26.3   | AK057536, AK124283, | 388182    | ENSG00000189419 |                    | NR_028139 |
| HGNC:41198 | SPATA42     | 1p13.3    |                     | 642864    | ENSG00000203897 |                    |           |
| HGNC:39933 | SPG20-AS1   | 13q13.3   |                     | 100507135 | ENSG00000120664 |                    | NR_045180 |
| HGNC:41177 | SPIN4-AS1   | Xq11.1    |                     |           | ENSG00000233661 |                    |           |
| HGNC:42394 | SPRY4-IT1   | 5q31.3    | AK024556            | 100642175 |                 | 21558391, 26829028 |           |
| HGNC:44122 | SPTY2D1-AS1 | 11p15.1   | AK097654            | 100506540 | ENSG00000247595 |                    | NR_038360 |
| HGNC:44138 | SRD5A3-AS1  | 4q12      | BC034006            | 100506462 | ENSG00000249700 |                    | NR_037969 |
| HGNC:40902 | SRGAP2-AS1  | 1q32.1    | AK127439            |           | ENSG00000233501 |                    |           |
| HGNC:40898 | SRGAP3-AS1  | 3p25.3    | AI209215, BX111651  |           | ENSG00000224808 |                    |           |
| HGNC:40899 | SRGAP3-AS2  | 3p25.3    |                     | 100507660 | ENSG00000228723 |                    |           |
| HGNC:40900 | SRGAP3-AS3  | 3p25.3    |                     | 100288831 | ENSG00000227929 |                    |           |
| HGNC:42434 | SRGAP3-AS4  | 3p25.3    |                     |           | ENSG00000235830 |                    |           |
| HGNC:48619 | SRP14-AS1   | 15q15.1   |                     | 100131089 | ENSG00000248508 |                    |           |
| HGNC:50643 | SRP54-AS1   | 14q13.2   |                     | 100506157 | ENSG00000258704 |                    |           |
| HGNC:44162 | SRRM2-AS1   | 16p13.3   | AK056063            | 100128788 | ENSG00000205913 |                    | NR_027274 |
| HGNC:32328 | SSBP3-AS1   | 1p32.3    | AF176918            | 619518    | ENSG00000198711 |                    |           |
| HGNC:27384 | SSSCA1-AS1  | 11q13.1   |                     | 254100    | ENSG00000260233 |                    |           |
| HGNC:26502 | SSTR5-AS1   | 16p13.3   | AK056814            | 146336    | ENSG00000261713 |                    | NR_02724  |
| HGNC:48645 | ST3GAL4-AS1 | 11q24.2   |                     | 399972    |                 |                    |           |
| HGNC:51129 | ST3GAL5-AS1 | 2p11.2    |                     | 101928113 | ENSG00000232504 |                    |           |
| HGNC:40828 | ST3GAL6-AS1 | 3q12.1    |                     |           | ENSG00000239445 |                    |           |
| HGNC:41380 | ST6GAL2-IT1 | 2q12.2    |                     |           | ENSG00000238250 |                    |           |
| HGNC:16000 | ST7-AS1     | 7q31.2    | AF400039            | 93653     | ENSG00000227199 | 12213198           | NR_002330 |
| HGNC:16044 | ST7-AS2     | 7q31.2    | AF400043            | 93654     | ENSG00000226367 | 12213198           | NR_002331 |
| HGNC:16045 | ST7-OT3     | 7q31.3    | AF400044            | 93655     |                 | 12213198           | NR_002332 |
| HGNC:44880 | ST8SIA6-AS1 | 10p12.33  |                     | 100128098 | ENSG00000204832 |                    | NR_034129 |
| HGNC:27521 | ST20-AS1    | 15q25.1   | AK091107            | 283687    | ENSG00000259642 |                    | NR_028330 |
| HGNC:49568 | STAM-AS1    | 10p12.33  | AK123677            |           | ENSG00000260589 | 23382218           |           |
| HGNC:44117 | STARD4-AS1  | 5q22.1    | CR749489            | 100505678 | ENSG00000246859 |                    | NR_040093 |
| HGNC:40827 | STARD7-AS1  | 2q11.2    |                     | 285033    | ENSG00000204685 |                    |           |
| HGNC:40873 | STARD13-AS  | 13q12-q13 |                     | 100874241 | ENSG00000236581 |                    | NR_046693 |
| HGNC:41453 | STARD13-IT1 | 13q13.1   |                     |           | ENSG00000230300 |                    |           |
| HGNC:44101 | STAU2-AS1   | 8q21.11   | AK056720            | 100128126 | ENSG00000253302 |                    | NR_038406 |
| HGNC:40820 | STEAP2-AS1  | 7q21.13   |                     |           | ENSG00000227646 |                    |           |
| HGNC:41053 | STEAP3-AS1  | 2q14.2    |                     |           | ENSG00000229867 |                    |           |
| HGNC:43811 | STK4-AS1    | 20q13.12  |                     | 100505826 | ENSG00000227477 |                    | NR_038341 |
| HGNC:39935 | STK24-AS1   | 13q32.2   |                     |           | ENSG00000224418 |                    |           |

|            |              |          |                       |           |                 |                     |           |
|------------|--------------|----------|-----------------------|-----------|-----------------|---------------------|-----------|
| HGNC:41209 | STPG2-AS1    | 4q22.3   | DA719663              |           | ENSG00000251620 |                     |           |
| HGNC:44585 | STT3A-AS1    | 11q24.2  | DB470444, DB453285    |           | ENSG00000254671 |                     |           |
| HGNC:51174 | STX17-AS1    | 9q31.1   | BC030123              | 441461    | ENSG00000255145 |                     | NR_038853 |
| HGNC:48877 | STX18-AS1    | 4p16.2   |                       | 100507266 | ENSG00000247708 | 23708191            |           |
| HGNC:41415 | STX18-IT1    | 4p16.3   |                       |           | ENSG00000248221 |                     |           |
| HGNC:44183 | STXBP5-AS1   | 6q24.3   | BC044307              | 729178    | ENSG00000233452 |                     | NR_034115 |
| HGNC:39965 | SUCLA2-AS1   | 13q14.2  |                       |           | ENSG00000227848 |                     |           |
| HGNC:49643 | SUCLG2-AS1   | 3p14.1   |                       | 101927111 | ENSG00000241316 |                     |           |
| HGNC:51219 | SVIL-AS1     | 10p11.23 |                       | 102724316 | ENSG00000224597 |                     | NR_110920 |
| HGNC:40793 | SYNE1-AS1    | 6q25.2   | CK821189, B1962584, B | 100505475 | ENSG00000234577 |                     |           |
| HGNC:41387 | SYNJ2-IT1    | 6q25.3   |                       |           | ENSG00000233496 |                     |           |
| HGNC:40774 | SYNPR-AS1    | 3p14.2   |                       |           | ENSG00000241359 |                     |           |
| HGNC:40571 | SYP-AS1      | Xp11.23  |                       |           | ENSG00000237341 |                     |           |
| HGNC:41225 | SZT2-AS1     | 1p34.2   |                       |           | ENSG00000229372 |                     |           |
| HGNC:20176 | TAB3-AS1     | Xp21.2   |                       | 727682    | ENSG00000231542 |                     |           |
| HGNC:40013 | TAB3-AS2     | Xp21.2   | BI002962              |           | ENSG00000235512 |                     |           |
| HGNC:40573 | TAF1A-AS1    | 1q41     |                       | 100506161 | ENSG00000225265 |                     |           |
| HGNC:26832 | TAPT1-AS1    | 4p15.32  |                       | 202020    | ENSG00000263327 |                     | NR_027696 |
| HGNC:50506 | TARID        | 6q23.2   |                       | 100507308 | ENSG00000227954 | 25087872            |           |
| HGNC:51369 | TAT-AS1      | 16q22.2  | HY017421, BU568247,   | 100132529 | ENSG00000260886 |                     | NR_103851 |
| HGNC:51221 | TBC1D22A-AS1 | 22q13.31 | AK057318              | 642757    |                 |                     | NR_122047 |
| HGNC:41243 | TBL1XR1-AS1  | 3q26.32  |                       |           | ENSG00000231310 |                     |           |
| HGNC:50355 | TBX2-AS1     | 17q23.2  | AI927936              |           | ENSG00000267280 |                     |           |
| HGNC:27402 | TBX5-AS1     | 12q24.21 |                       | 255480    | ENSG00000255399 |                     | NR_038440 |
| HGNC:52256 | TBX18-AS1    | 6q14.3   |                       | 102724201 | ENSG00000228290 |                     | NR_125875 |
| HGNC:41191 | TCEAL3-AS1   | Xq22.2   | AV651489              |           | ENSG00000224031 |                     |           |
| HGNC:50582 | TCEB3-AS1    | 1p36.11  |                       | 100506963 | ENSG00000236810 |                     |           |
| HGNC:49532 | TCERG1L-AS1  | 10q26.3  | BQ007413, BQ011025,   | 101927489 | ENSG00000230098 |                     | XR_242764 |
| HGNC:51642 | TCF4-AS1     | 18q21.2  |                       |           | ENSG00000267028 |                     |           |
| HGNC:51643 | TCF4-AS2     | 18q21.2  |                       |           | ENSG00000267402 |                     |           |
| HGNC:41388 | TCF7L1-IT1   | 2p11.2   |                       |           | ENSG00000231134 |                     |           |
| HGNC:13463 | TCL6         | 14q32.1  | AB035338              | 27004     | ENSG00000187621 | 10588720, 10851082  | NM_012468 |
| HGNC:43642 | TDRG1        | 6p21.2   | DQ168992              | 732253    | ENSG00000204091 | 19403381, 22123530, | NR_024015 |
| HGNC:51142 | TESC-AS1     | 12q24.22 |                       | 101928244 | ENSG00000258285 |                     |           |
| HGNC:41125 | TET2-AS1     | 4q24     |                       |           | ENSG00000251586 |                     |           |
| HGNC:42784 | TEX26-AS1    | 13q12.3  | BC042736              | 100507064 |                 |                     | NR_038288 |
| HGNC:49500 | TEX36-AS1    | 10q26.13 |                       | 100169752 | ENSG00000237675 |                     | NR_023362 |
| HGNC:48667 | TEX41        | 2q22.3   | BC043549              | 401014    | ENSG00000226674 |                     | NR_033870 |
| HGNC:40579 | TFAP2A-AS1   | 6p24.3   |                       | 100130275 | ENSG00000229950 |                     |           |
| HGNC:41389 | TGFA-IT1     | 2p13.3   |                       |           | ENSG00000224606 |                     |           |
| HGNC:50628 | TGFB2-AS1    | 1q41     | BX099841              | 728463    | ENSG00000232480 |                     | NR_046268 |
| HGNC:50629 | TGFB2-OT1    | 1q41     | AK021874              | 103611157 | ENSG00000281453 | 24879147, 25437332  | NR_125715 |
| HGNC:40495 | TH2LCRR      | 5q31.1   |                       | 101927761 | ENSG00000223442 | 25903499            | NR_132124 |
| HGNC:41013 | THAP7-AS1    | 22q11.21 |                       | 439931    | ENSG00000230513 |                     | NR_027051 |
| HGNC:44172 | THAP9-AS1    | 4q21.22  | BC063702              | 100499177 | ENSG00000251022 |                     | NR_034075 |
| HGNC:41249 | THOC7-AS1    | 3p14.1   |                       |           | ENSG00000240549 |                     |           |
| HGNC:44515 | THRB-AS1     | 3p24.2   |                       | 644990    | ENSG00000228791 |                     | NR_046244 |
| HGNC:41390 | THRB-IT1     | 3p24.2   |                       |           | ENSG00000224822 |                     |           |
| HGNC:49503 | THRIL        | 12q24.31 | AK025766              | 102659353 |                 | 24371310            | NR_110375 |
| HGNC:51420 | THSD4-AS1    | 15q23    | DA243226, DA296094    | 101929196 | ENSG00000259964 |                     | NR_120348 |
| HGNC:51421 | THSD4-AS2    | 15q23    | AK055527              | 101929173 |                 |                     | NR_120346 |
| HGNC:44478 | THUMP3-AS1   | 3p25.3   | BC052961              | 440944    | ENSG00000206573 |                     | NR_027007 |
| HGNC:14607 | TINCR        | 19p13.3  | BG354568              | 257000    | ENSG00000223573 | 23201690, 24019000  | NR_027064 |
| HGNC:41028 | TIPARP-AS1   | 3q25.31  |                       | 100287227 | ENSG00000243926 |                     | NR_027954 |



|            |              |             |                       |           |                 |                              |             |
|------------|--------------|-------------|-----------------------|-----------|-----------------|------------------------------|-------------|
| HGNC:40720 | TLR8-AS1     | Xp22.2      |                       | 349408    | ENSG00000233338 |                              |             |
| HGNC:37183 | TLX1NB       | 10q24       | BC019674              | 100038246 | ENSG00000236311 | 17303350                     | NM_00108539 |
| HGNC:40587 | TM4SF1-AS1   | 3q25.1      |                       |           | ENSG00000240541 |                              |             |
| HGNC:41085 | TM4SF19-AS1  | 3q29        |                       |           | ENSG00000235897 |                              |             |
| HGNC:51424 | TMC3-AS1     | 15q25.1     | HY112626, CB134362    | 101929655 | ENSG00000259343 |                              | NR_120365   |
| HGNC:49060 | TMCC1-AS1    | 3q22.1      |                       | 100507032 | ENSG00000271270 |                              |             |
| HGNC:48910 | TMEM5-AS1    | 12q14.2     | DB026756              |           | ENSG00000255850 |                              |             |
| HGNC:19230 | TMEM9B-AS1   | 11p15.3     | AJ400877              | 493900    | ENSG00000254860 | 11528127                     |             |
| HGNC:51209 | TMEM26-AS1   | 10q21.2     | BC041470              | 101928781 | ENSG00000237233 |                              | NR_120643   |
| HGNC:44272 | TMEM44-AS1   | 3q29        | BE071707, BI088778, B | 100507297 | ENSG00000231770 |                              | NR_047573   |
| HGNC:26301 | TMEM51-AS1   | 1p36.21     | AK074283              | 200197    | ENSG00000175147 |                              | NR_027136   |
| HGNC:27349 | TMEM72-AS1   | 10q11.21    |                       | 220980    | ENSG00000224812 |                              | NR_033842   |
| HGNC:50442 | TMEM92-AS1   | 17q21.33    | BU687974              |           | ENSG00000251179 | 24768205                     |             |
| HGNC:50307 | TMEM108-AS1  | 3q22.1      |                       | 101927455 | ENSG00000251011 |                              |             |
| HGNC:51273 | TMEM147-AS1  | 19q13.12    | CR627053              | 100506469 | ENSG00000236144 |                              | NR_038396   |
| HGNC:43839 | TMEM161B-AS1 | 5q14.3      | AK082072              | 100505894 | ENSG00000247828 | 21890647                     | NR_039993   |
| HGNC:41939 | TMEM212-AS1  | 3q26.31     |                       |           | ENSG00000234717 |                              |             |
| HGNC:41505 | TMEM212-IT1  | 3q26.31     |                       |           | ENSG00000235943 |                              |             |
| HGNC:44357 | TMEM220-AS1  | 17p13.1-p12 | DA190285              | 101101775 | ENSG00000263400 |                              |             |
| HGNC:51191 | TMEM246-AS1  | 9q31.1      |                       | 101928470 | ENSG00000225376 |                              | NR_121573   |
| HGNC:27340 | TMEM254-AS1  | 10q22.3     |                       | 219347    | ENSG00000230091 |                              |             |
| HGNC:44261 | TMLHE-AS1    | Xq28        | BC042086              | 100507404 | ENSG00000224533 |                              | NR_039991   |
| HGNC:44158 | TMPO-AS1     | 12q23.1     |                       | 100128191 | ENSG00000257167 |                              | NR_027157   |
| HGNC:44179 | TMPRSS4-AS1  | 11q23.3     |                       | 100526771 | ENSG00000255274 |                              | NR_038318   |
| HGNC:49093 | TNK2-AS1     | 3q29        | AK127609              | 100128262 | ENSG00000224614 |                              |             |
| HGNC:45173 | TNKS2-AS1    | 10q23.32    | AA776692              | 100507633 | ENSG00000228701 |                              |             |
| HGNC:41391 | TNR-IT1      | 1q25.1      |                       |           | ENSG00000235628 |                              |             |
| HGNC:44360 | TNRC6C-AS1   | 17q25.3     |                       | 100131096 | ENSG00000204282 |                              |             |
| HGNC:44340 | TOB1-AS1     | 17q21.33    | BC039664, BP421960,   | 400604    | ENSG00000229980 |                              | NR_038458   |
| HGNC:27403 | TOLLIP-AS1   | 11p15.5     |                       | 255512    | ENSG00000255153 | 12477932                     |             |
| HGNC:51556 | TONSL-AS1    | 8q24.3      |                       | 100287098 | ENSG00000232600 |                              | NR_109770   |
| HGNC:31420 | TOPORS-AS1   | 9p21.1      |                       | 100129250 | ENSG00000235453 |                              | NR_033991   |
| HGNC:43652 | TP53COR1     | 6p21.2      | CD515754              | 102800311 |                 | 20673990, 22841487, 24381249 |             |
| HGNC:17026 | TP53TG1      | 7q21.1      | AB007455              | 11257     | ENSG00000182165 | 9713990                      |             |
| HGNC:29052 | TP73-AS1     | 1p36.32     |                       | 57212     | ENSG00000227372 | 9455484, 20477830, 2         | NR_033708   |
| HGNC:42391 | TPRG1-AS1    | 3q28        |                       |           | ENSG00000234076 |                              |             |
| HGNC:41062 | TPRG1-AS2    | 3q28        |                       |           | ENSG00000230115 |                              |             |
| HGNC:43686 | TPT1-AS1     | 13q14.13    | AF318337              | 100190939 | ENSG00000170919 |                              | NR_024458   |
| HGNC:40005 | TRAF3IP2-AS1 | 6q21        |                       | 643749    | ENSG00000231889 |                              | NR_034108   |
| HGNC:48663 | TRAM2-AS1    | 6p12.2      |                       | 401264    | ENSG00000225791 |                              |             |
| HGNC:41046 | TRAPPC12-AS1 | 2p25.3      | BG683264              |           | ENSG00000225234 |                              |             |
| HGNC:44307 | TRERNA1      | 20q13.13    | AI968488, BX118093    | 100887755 | ENSG00000231265 | 20887892, 23974796           | NR_051976   |
| HGNC:48974 | TRG-AS1      | 7p14.1      |                       | 100506776 |                 |                              | NR_040085   |
| HGNC:27471 | TRHDE-AS1    | 12q21.1     | BC040230              | 283392    | ENSG00000236333 |                              | NR_026836   |
| HGNC:39761 | TRIM31-AS1   | 6p22.1      |                       |           | ENSG00000231226 |                              |             |
| HGNC:41422 | TRIM36-IT1   | 5q22.3      |                       |           | ENSG00000250472 |                              |             |
| HGNC:49006 | TRIM52-AS1   | 5q35.3      |                       | 100507602 | ENSG00000248275 |                              |             |
| HGNC:41116 | TRMT2B-AS1   | Xq22.1      |                       |           | ENSG00000225839 |                              |             |
| HGNC:40936 | TRPC7-AS1    | 5q31.1      |                       |           | ENSG00000248211 |                              |             |
| HGNC:40937 | TRPC7-AS2    | 5q31.1      |                       |           | ENSG00000250947 |                              |             |
| HGNC:50758 | TRPM2-AS     | 21q22.3     | AK057275              | 101928607 | ENSG00000230061 | 18957938, 24931166           | NR_109964   |
| HGNC:43684 | TSC22D1-AS1  | 13q14.11    | BC040675              | 641467    |                 |                              | NR_038381   |
| HGNC:12377 | TSIX         | Xq13.2      |                       | 9383      |                 | 10192391                     | NR_003255   |
| HGNC:41462 | TSPAN9-IT1   | 12p13.33    |                       |           | ENSG00000256197 |                              |             |

|            |            |          |                     |           |                 |                     |           |
|------------|------------|----------|---------------------|-----------|-----------------|---------------------|-----------|
| HGNC:1271  | TSPEAR-AS1 | 21q22.3  |                     | 54082     | ENSG00000235890 |                     |           |
| HGNC:16428 | TSPEAR-AS2 | 21q22.3  | AF426270            | 114043    | ENSG00000182912 | 12036297            | NR_026547 |
| HGNC:41392 | TSSC1-IT1  | 2p25.3   |                     |           | ENSG00000224885 |                     |           |
| HGNC:40595 | TTC3-AS1   | 21q22.13 | BF979681            |           | ENSG00000228677 |                     |           |
| HGNC:41115 | TTC21B-AS1 | 2q24.3   |                     | 100506134 | ENSG00000224490 |                     |           |
| HGNC:29336 | TTC28-AS1  | 22q12.1  |                     | 284900    | ENSG00000235954 | 11258795            | NR_026962 |
| HGNC:40851 | TTC39A-AS1 | 1p32.3   | CB128747            |           | ENSG00000261664 |                     |           |
| HGNC:51321 | TTC39C-AS1 | 18q11.2  | DB448536, DB513641, | 102724246 | ENSG00000264745 |                     | NR_110796 |
| HGNC:41486 | TTL7-IT1   | 1p31.1   |                     |           | ENSG00000233061 |                     |           |
| HGNC:41159 | TTL10-AS1  | 1p36.33  | AK128833            | 100506376 | ENSG00000205231 |                     |           |
| HGNC:24214 | TTL11-IT1  | 9q34.11  |                     | 401550    | ENSG00000237548 |                     |           |
| HGNC:44124 | TTN-AS1    | 2q31.2   | BC041357            | 100506866 | ENSG00000237298 |                     | NR_038272 |
| HGNC:14022 | TTY1       | Yp11.2   | AF000990            | 50858     | ENSG00000129845 |                     | NR_001538 |
| HGNC:37981 | TTY1B      | Yp11.2   |                     | 100101116 | ENSG00000129816 |                     | NR_003589 |
| HGNC:14023 | TTY2       | Yp11.2   | AF000991            | 60439     | ENSG00000212855 |                     | NR_001536 |
| HGNC:37982 | TTY2B      | Yp11.2   |                     | 100101117 | ENSG00000212856 |                     | NR_003590 |
| HGNC:16480 | TTY3       | Yq11.23  | AF332230            | 114760    | ENSG00000231141 |                     | NR_001524 |
| HGNC:31888 | TTY3B      | Yq11.23  |                     | 474148    | ENSG00000280961 |                     | NR_002176 |
| HGNC:16481 | TTY4       | Yq11.2   | AF332231            | 114761    | ENSG00000226906 |                     | NR_001525 |
| HGNC:31891 | TTY4B      | Yq11.223 |                     | 474149    | ENSG00000235412 |                     | NR_002178 |
| HGNC:31892 | TTY4C      | Yq11.223 |                     | 474150    | ENSG00000228296 |                     | NR_002177 |
| HGNC:16482 | TTY5       | Yq11.222 | AF332236            | 83863     | ENSG00000215560 |                     | NR_001541 |
| HGNC:16483 | TTY6       | Yq11.223 | AF332237            | 84672     | ENSG00000131538 |                     | NR_001527 |
| HGNC:31887 | TTY6B      | Yq11.223 | AY597808            | 441543    | ENSG00000131548 |                     | NR_002175 |
| HGNC:18488 | TTY7       | Yp11.2   | AF332232            | 246122    | ENSG00000147753 |                     | NR_001534 |
| HGNC:37463 | TTY7B      | Yp11.2   | BX089948            | 100101120 | ENSG00000147761 |                     | NR_003592 |
| HGNC:18489 | TTY8       | Yp11.2   | AF332234            | 84673     | ENSG00000183385 |                     | NR_001533 |
| HGNC:37622 | TTY8B      | Yp11.2   |                     | 100101118 | ENSG00000185700 |                     | NR_003591 |
| HGNC:18490 | TTY9A      | Yq11.222 | AF332238            | 83864     |                 |                     | NR_001530 |
| HGNC:32425 | TTY9B      | Yq11.221 |                     | 425057    | ENSG00000131007 | 12815422            | NR_002159 |
| HGNC:18491 | TTY10      | Yq11.221 | AF332239            | 246119    | ENSG00000229236 |                     | NR_001542 |
| HGNC:18492 | TTY11      | Yp11.2   | AF332240            | 83866     | ENSG00000180910 |                     | NR_001548 |
| HGNC:18493 | TTY12      | Yp11.2   | AF332241            | 83867     | ENSG00000237048 |                     | NR_001551 |
| HGNC:18494 | TTY13      | Yp11.2   | AF332242            | 83868     | ENSG00000184991 |                     | NR_001537 |
| HGNC:38596 | TTY13B     | Yp11.2   |                     | 100287735 |                 |                     |           |
| HGNC:18495 | TTY14      | Yq11.222 | AF332243            | 83869     | ENSG00000176728 |                     | NR_001543 |
| HGNC:18567 | TTY15      | Yq11.1   | AL080135            | 64595     | ENSG00000233864 |                     | NR_001545 |
| HGNC:18840 | TTY16      | Yp11.2   |                     | 252948    | ENSG00000225520 |                     | NR_001552 |
| HGNC:18841 | TTY17A     | Yq11.2   | AF527829            | 252949    | ENSG00000228240 |                     | NR_001526 |
| HGNC:31889 | TTY17B     | Yq11.223 |                     | 474151    | ENSG00000227439 |                     | NR_002180 |
| HGNC:31890 | TTY17C     | Yq11.223 |                     | 474152    | ENSG00000223641 |                     | NR_002179 |
| HGNC:18842 | TTY18      | Yp11.2   |                     | 252950    | ENSG00000233699 |                     | NR_001550 |
| HGNC:18843 | TTY19      | Yp11.2   |                     | 252952    | ENSG00000232419 |                     | NR_001549 |
| HGNC:18844 | TTY20      | Yp11.2   |                     | 252951    | ENSG00000232808 |                     | NR_001546 |
| HGNC:18845 | TTY21      | Yp11.2   |                     | 252953    | ENSG00000228890 |                     | NR_001535 |
| HGNC:37980 | TTY21B     | Yp11.2   |                     | 100101115 | ENSG00000237563 |                     | NR_003588 |
| HGNC:18846 | TTY22      | Yp11.2   |                     | 252954    | ENSG00000224075 |                     | NR_001539 |
| HGNC:18847 | TTY23      | Yp11.2   |                     | 252955    | ENSG00000239225 |                     | NR_001540 |
| HGNC:37983 | TTY23B     | Yp11.2   |                     | 100101121 | ENSG00000237069 |                     | NR_003593 |
| HGNC:51120 | TUB-AS1    | 11p15.4  |                     | 101927917 | ENSG00000248332 |                     |           |
| HGNC:26066 | TUG1       | 22q12.2  | AK057695            | 55000     | ENSG00000253352 | 15797018, 22961206, | NR_002323 |
| HGNC:44088 | TUNAR      | 14q32.2  | AK023027            | 100507043 | ENSG00000250366 | 24530304, 22196729, | NR_038861 |
| HGNC:27701 | TUSC7      | 3q13.31  | BC035185            | 285194    | ENSG00000243197 | 20048075, 23680400  | NR_015391 |
| HGNC:49111 | TUSC8      | 13q14.11 | BC025370            | 400128    | ENSG00000237361 | 24667250            | NR_104174 |

|            |             |             |                    |           |                 |                     |           |
|------------|-------------|-------------|--------------------|-----------|-----------------|---------------------|-----------|
| HGNC:30008 | TXNDC12-AS1 | 1p32.3      | AI221303           |           | ENSG00000228369 |                     |           |
| HGNC:49083 | UBA6-AS1    | 4q13.2      |                    | 550112    | ENSG00000248049 |                     |           |
| HGNC:42502 | UBAC2-AS1   | 13q32.3     |                    | 100289373 | ENSG00000228889 |                     |           |
| HGNC:40598 | UBE2E1-AS1  | 3p24.3      |                    |           | ENSG00000223791 |                     |           |
| HGNC:44512 | UBE2E2-AS1  | 3p24.3      |                    | 100505877 | ENSG00000233153 |                     |           |
| HGNC:40722 | UBE2Q1-AS1  | 1q21.3      | AW070285           |           | ENSG00000229780 |                     |           |
| HGNC:49911 | UBE2R2-AS1  | 9p13.3      | HG501976           | 101929665 |                 |                     |           |
| HGNC:48614 | UBL7-AS1    | 15q24.1     |                    | 440288    | ENSG00000247240 |                     |           |
| HGNC:44111 | UBOX5-AS1   | 20p13       | AK097516           | 100134015 | ENSG00000235958 |                     | NR_038395 |
| HGNC:51661 | UBR5-AS1    | 8q22.3      |                    | 101927221 | ENSG00000246263 |                     | NR_125415 |
| HGNC:41227 | UBXN7-AS1   | 3q29        |                    |           | ENSG00000225822 |                     |           |
| HGNC:41141 | UBXN10-AS1  | 1p36.12     | AI288607           | 101928017 | ENSG00000225986 |                     |           |
| HGNC:37126 | UCA1        | 19p13.12    | BC005351           | 652995    | ENSG00000214049 | 18501714, 17416635, | NR_015379 |
| HGNC:40600 | UCHL1-AS1   | 4p13        | DB169394, CN277289 |           | ENSG00000251173 |                     |           |
| HGNC:31967 | UCKL1-AS1   | 20q13.33    | AK128497           | 100113386 |                 |                     | NR_027287 |
| HGNC:41007 | UFL1-AS1    | 6q16.1      | BM126999, BM127608 |           | ENSG00000233797 |                     |           |
| HGNC:40601 | UGDH-AS1    | 4p14        |                    |           | ENSG00000249348 |                     |           |
| HGNC:23821 | UMODL1-AS1  | 21q22.3     |                    | 150147    | ENSG00000184385 |                     | NR_027243 |
| HGNC:45096 | UNC5B-AS1   | 10q22.1     |                    | 728978    | ENSG00000237512 |                     | NR_038453 |
| HGNC:40603 | UPK1A-AS1   | 19q13.12    | BC007817           |           | ENSG00000226510 |                     |           |
| HGNC:41467 | UPP2-IT1    | 2q24.1      |                    |           | ENSG00000237327 |                     |           |
| HGNC:23128 | URB1-AS1    | 21q22.11    | BC007928           | 84996     | ENSG00000256073 |                     | NR_026845 |
| HGNC:48673 | USP2-AS1    | 11q23.3     |                    | 100499227 | ENSG00000245248 |                     |           |
| HGNC:44140 | USP3-AS1    | 15q22.31    | AK093077           | 100130855 | ENSG00000259248 |                     | NR_034080 |
| HGNC:39961 | USP12-AS1   | 13q12.13    |                    |           | ENSG00000232162 |                     |           |
| HGNC:39962 | USP12-AS2   | 13q12.13    |                    |           | ENSG00000230641 |                     |           |
| HGNC:27249 | USP27X-AS1  | Xp11.23     |                    | 158572    | ENSG00000234390 |                     |           |
| HGNC:40909 | USP30-AS1   | 12q24.11    |                    | 100131733 | ENSG00000256262 |                     | NR_038996 |
| HGNC:43991 | USP46-AS1   | 4q12        | BX354350, CN313378 | 643783    | ENSG00000248866 |                     |           |
| HGNC:40802 | UST-AS1     | 6q25.1      |                    | 100128176 | ENSG00000227660 |                     | NR_038408 |
| HGNC:49239 | UXT-AS1     | Xp11.23     |                    | 100133957 | ENSG00000267064 |                     |           |
| HGNC:48605 | VAC14-AS1   | 16q22.2     | AK095020, DB487352 | 100130894 | ENSG00000214353 |                     | NR_034083 |
| HGNC:40608 | VAV3-AS1    | 1p13.3      | AA425131, BG193383 |           | ENSG00000230489 |                     |           |
| HGNC:40163 | VCAN-AS1    | 5q14.3      |                    |           | ENSG00000249835 |                     |           |
| HGNC:44879 | VIM-AS1     | 10p13       | BC078172           | 100507347 | ENSG00000229124 |                     |           |
| HGNC:40610 | VIPR1-AS1   | 3p22.1      |                    |           | ENSG00000232354 |                     |           |
| HGNC:49621 | VLDLR-AS1   | 9p24.2      | AK092343, BC004474 | 401491    | ENSG00000236404 |                     | NR_015375 |
| HGNC:48915 | VPS9D1-AS1  | 16q24.3     |                    | 100128881 | ENSG00000261373 |                     |           |
| HGNC:44167 | VPS13A-AS1  | 9q21.2      | AA954471, DB509755 | 100286938 | ENSG00000232998 |                     | NR_026668 |
| HGNC:50770 | VSTM2A-OT1  | 7p11.2      |                    | 285878    | ENSG00000224223 |                     |           |
| HGNC:44270 | VWA8-AS1    | 13q14.11    | AK092199, CA310831 | 100507240 |                 |                     | NR_039974 |
| HGNC:41508 | VWC2L-IT1   | 2q35        |                    |           | ENSG00000224257 |                     |           |
| HGNC:27347 | WAC-AS1     | 10p12.1     |                    | 220906    | ENSG00000254635 | 12477932            |           |
| HGNC:41393 | WARS2-IT1   | 1p12        |                    |           | ENSG00000224238 |                     |           |
| HGNC:39841 | WASF3-AS1   | 13q12.13    |                    |           | ENSG00000237001 |                     |           |
| HGNC:38513 | WASIR1      | Xq28 and Yq | AJ271736           | 100128260 | ENSG00000185203 |                     |           |
| HGNC:38609 | WASIR2      | 16p13.3     | BC032901, CR605219 | 100132169 | ENSG00000231439 | 11157797            | XR_078518 |
| HGNC:40935 | WDFY3-AS1   | 4q21.23     |                    |           | ENSG00000251260 |                     |           |
| HGNC:21603 | WDFY3-AS2   | 4q21.3      | AY250185           | 404201    | ENSG00000180769 | 15580561            | NR_015359 |
| HGNC:45131 | WDR7-OT1    | 18q21.31    | DA634713           |           | ENSG00000267225 |                     |           |
| HGNC:27437 | WDR11-AS1   | 10q26.12    | AK094649           | 283089    | ENSG00000227165 |                     | NR_033850 |
| HGNC:41186 | WDR86-AS1   | 7q36.1      | AK095986           | 100131176 | ENSG00000243836 |                     | NR_034012 |
| HGNC:48669 | WEE2-AS1    | 7q34        |                    | 285962    | ENSG00000228775 |                     |           |
| HGNC:49126 | WISP1-OT1   | 8q24.22     | BQ009791           |           | ENSG00000270132 |                     |           |

|            |             |          |                    |           |                 |                      |           |
|------------|-------------|----------|--------------------|-----------|-----------------|----------------------|-----------|
| HGNC:40616 | WNT5A-AS1   | 3p14.3   |                    |           | ENSG00000244586 |                      |           |
| HGNC:51639 | WSPAR       | 5q31.1   | BE270324           |           | ENSG00000249073 | 25842979             |           |
| HGNC:18135 | WT1-AS      | 11p13    | BC002734           | 51352     | ENSG00000183242 | 2173145, 8406502, 17 | NR_023920 |
| HGNC:41041 | WWC2-AS1    | 4q35.1   |                    |           | ENSG00000251128 |                      |           |
| HGNC:26390 | WWC2-AS2    | 4q35.1   | AK054839           | 152641    | ENSG00000251359 |                      |           |
| HGNC:41236 | WWC3-AS1    | Xp22.2   |                    |           | ENSG00000225076 |                      |           |
| HGNC:41035 | WWTR1-AS1   | 3q25.1   |                    | 100128025 | ENSG00000241313 |                      |           |
| HGNC:41469 | WWTR1-IT1   | 3q25.1   |                    |           | ENSG00000241985 |                      |           |
| HGNC:45056 | XACT        | Xq23     | BQ010753           | 105463123 | ENSG00000241743 | 23334669, 25921272   | NR_131204 |
| HGNC:40078 | XIAP-AS1    | Xq25     |                    |           | ENSG00000237331 |                      |           |
| HGNC:40679 | XIRP2-AS1   | 2q24.3   |                    |           | ENSG00000254552 |                      |           |
| HGNC:12810 | XIST        | Xq13.2   | M97168             | 7503      | ENSG00000229807 | 1985261, 2034279     | NR_001564 |
| HGNC:41153 | XXYLT1-AS1  | 3q29     | BF509707           |           | ENSG00000233303 |                      |           |
| HGNC:41154 | XXYLT1-AS2  | 3q29     | R83154, AW963078   |           | ENSG00000230266 |                      |           |
| HGNC:49034 | YAM1        | 16p11.2  |                    |           |                 | 23942234             |           |
| HGNC:41101 | YEATS2-AS1  | 3q27.1   |                    |           | ENSG00000233885 |                      |           |
| HGNC:48728 | YTHDF3-AS1  | 8q12.3   | BM681776, BM967225 | 101410533 | ENSG00000270673 |                      |           |
| HGNC:44188 | ZBED3-AS1   | 5q13.3   |                    | 728723    | ENSG00000250802 | 25482444             | NR_024398 |
| HGNC:48646 | ZBED5-AS1   | 11p15.3  |                    | 729013    | ENSG00000247271 |                      |           |
| HGNC:48573 | ZBTB11-AS1  | 3q12.3   |                    | 100009676 | ENSG00000256628 |                      |           |
| HGNC:40640 | ZBTB20-AS1  | 3q13.31  |                    | 100131117 | ENSG00000241560 |                      |           |
| HGNC:42421 | ZBTB20-AS2  | 3q13.31  |                    | 100506673 | ENSG00000241295 |                      |           |
| HGNC:42422 | ZBTB20-AS3  | 3q13.31  |                    |           | ENSG00000239946 |                      |           |
| HGNC:42423 | ZBTB20-AS4  | 3q13.31  |                    |           | ENSG00000242767 |                      |           |
| HGNC:41493 | ZBTB40-IT1  | 1p36.12  |                    |           | ENSG00000237200 |                      |           |
| HGNC:40753 | ZBTB46-AS1  | 20q13.33 |                    | 101928604 | ENSG00000231208 |                      |           |
| HGNC:39900 | ZDHHC20-IT1 | 13q12.11 |                    |           | ENSG00000236953 |                      |           |
| HGNC:42354 | ZEB1-AS1    | 10p11.22 |                    | 220930    | ENSG00000237036 |                      |           |
| HGNC:37149 | ZEB2-AS1    | 2q22.3   |                    | 100303491 | ENSG00000238057 | 18347095, 26152796   |           |
| HGNC:33101 | ZFAS1       | 20q13.13 | AY513722, AY513723 | 441951    | ENSG00000177410 | 21460236             | NR_003604 |
| HGNC:33992 | ZFAT-AS1    | 8q24.22  | AB167742           | 594840    | ENSG00000248492 | 15294872, 22894909   | NR_002438 |
| HGNC:44165 | ZFHX4-AS1   | 8q21.11  | BC037827           | 100192378 | ENSG00000253661 |                      | NR_024360 |
| HGNC:50698 | ZFPM2-AS1   | 8q23.1   | BF244158           |           | ENSG00000251003 |                      |           |
| HGNC:40617 | ZFX-AS1     | Xp22.11  |                    |           | ENSG00000234230 |                      |           |
| HGNC:38798 | ZFY-AS1     | Yp11.31  |                    | 100506003 | ENSG00000233070 |                      |           |
| HGNC:40920 | ZIC4-AS1    | 3q24     |                    |           | ENSG00000241202 |                      |           |
| HGNC:51304 | ZIM2-AS1    | 19q13.43 |                    | 101929059 | ENSG00000269793 | 19539734             | NR_110744 |
| HGNC:27433 | ZMIZ1-AS1   | 10q22.3  |                    | 283050    | ENSG00000224596 |                      | NR_024431 |
| HGNC:40624 | ZMYM4-AS1   | 1p34.3   | BG187713, BG208679 |           | ENSG00000227409 |                      |           |
| HGNC:40890 | ZMYND10-AS1 | 3p21.31  |                    |           | ENSG00000235058 |                      |           |
| HGNC:51179 | ZNF30-AS1   | 19q13.11 |                    | 102723513 | ENSG00000270876 |                      | NR_110749 |
| HGNC:23577 | ZNF32-AS1   | 10q11.21 |                    |           | ENSG00000226245 |                      |           |
| HGNC:23593 | ZNF32-AS2   | 10q11.21 |                    |           | ENSG00000230565 |                      |           |
| HGNC:23583 | ZNF32-AS3   | 10q11.21 | BC033403           | 414201    | ENSG00000223910 |                      |           |
| HGNC:40620 | ZNF197-AS1  | 3p21.31  |                    |           | ENSG00000233509 |                      |           |
| HGNC:28586 | ZNF205-AS1  | 16p13.3  |                    | 81854     | ENSG00000263214 | 12477932             | NR_024166 |
| HGNC:50505 | ZNF213-AS1  | 16p13.3  |                    | 100507458 | ENSG00000263072 |                      |           |
| HGNC:27821 | ZNF252P-AS1 | 8q24.3   | AK092777           | 286103    | ENSG00000255559 | 12477932             | NR_026974 |
| HGNC:23130 | ZNF295-AS1  | 21q22.3  |                    | 150142    | ENSG00000237232 |                      | NR_027273 |
| HGNC:40759 | ZNF337-AS1  | 20p11.1  |                    |           | ENSG00000213742 |                      |           |
| HGNC:50736 | ZNF341-AS1  | 20q11.22 |                    | 101929746 | ENSG00000230753 |                      |           |
| HGNC:41423 | ZNF346-IT1  | 5q35.2   |                    |           | ENSG00000251666 |                      |           |
| HGNC:48598 | ZNF350-AS1  | 19q13.41 | BC014606, DA066128 | 101669766 | ENSG00000269235 |                      |           |
| HGNC:41136 | ZNF385D-AS1 | 3p24.3   |                    |           | ENSG00000225542 |                      |           |

|            |             |          |                    |           |                 |          |           |
|------------|-------------|----------|--------------------|-----------|-----------------|----------|-----------|
| HGNC:42420 | ZNF385D-AS2 | 3p24.3   |                    |           | ENSG00000223351 |          |           |
| HGNC:25122 | ZNF436-AS1  | 1p36.12  | BC028411           | 148898    | ENSG00000249087 | 12477932 | NR_033691 |
| HGNC:27370 | ZNF503-AS1  | 10q22.2  |                    | 253264    | ENSG00000226051 |          |           |
| HGNC:23525 | ZNF503-AS2  | 10q22.3  | BC029963           | 100131213 | ENSG00000237149 |          | NR_024422 |
| HGNC:51305 | ZNF528-AS1  | 19q13.41 |                    | 102724105 | ENSG00000269834 |          | NR_125345 |
| HGNC:51275 | ZNF529-AS1  | 19q13.12 |                    | 101927599 | ENSG00000233527 |          | NR_110705 |
| HGNC:27613 | ZNF561-AS1  | 19p13.2  |                    | 284385    | ENSG00000267106 |          | NR_122038 |
| HGNC:44324 | ZNF571-AS1  | 19q13.12 | BC042488, BX647800 | 100507433 | ENSG00000267470 |          | NR_038247 |
| HGNC:25213 | ZNF582-AS1  | 19q13.43 | AW160702, BC036928 | 386758    |                 | 12477932 | NR_037159 |
| HGNC:41215 | ZNF630-AS1  | Xp11.23  |                    |           | ENSG00000277541 |          |           |
| HGNC:41434 | ZNF638-IT1  | 2p13.2   | BC044944           | 100507113 |                 |          |           |
| HGNC:51285 | ZNF649-AS1  | 19q13.41 |                    | 101928571 | ENSG00000268095 |          | NR_110733 |
| HGNC:44321 | ZNF667-AS1  | 19q13.43 | AW955601, BC110411 | 100128252 | ENSG00000166770 |          | NR_036521 |
| HGNC:44266 | ZNF674-AS1  | Xp11.23  | BC034616, DA707714 | 401588    | ENSG00000230844 |          | NR_015378 |
| HGNC:27617 | ZNF790-AS1  | 19q13.12 |                    | 284408    |                 |          | NR_040027 |
| HGNC:51303 | ZNF793-AS1  | 19q13.12 |                    | 101927720 | ENSG00000266916 |          | NR_110723 |
| HGNC:41927 | ZNRF3-AS1   | 22q12.1  |                    |           | ENSG00000177993 |          |           |
| HGNC:41440 | ZNRF3-IT1   | 22q12.1  |                    |           | ENSG00000235786 |          |           |
| HGNC:43594 | ZRANB2-AS1  | 1p31.1   | BC070115           | 100132618 | ENSG00000235079 |          | NR_038420 |
| HGNC:43595 | ZRANB2-AS2  | 1p31.1   | BC054887           | 100852410 | ENSG00000229956 |          |           |
| HGNC:48982 | ZSCAN16-AS1 | 6p22.1   |                    | 100129195 | ENSG00000269293 |          |           |
| HGNC:45103 | ZSWIM8-AS1  | 10q22.2  |                    | 100507331 | ENSG00000272589 |          | NR_038357 |

| Variables                          | N   | LINC00271  |            | P value      |
|------------------------------------|-----|------------|------------|--------------|
|                                    |     | High       | Low        |              |
| <b>Age (years)</b>                 |     |            |            | 0.962        |
| <45                                | 99  | 48 (48.5%) | 51 (51.5%) |              |
| ≥45                                | 86  | 42 (48.8%) | 44 (51.2%) |              |
| <b>Gender</b>                      |     |            |            | <b>0.006</b> |
| <b>Male</b>                        | 43  | 13 (30.2%) | 30 (69.8%) |              |
| <b>Female</b>                      | 142 | 77 (54.2%) | 65 (45.8%) |              |
| <b>Maximum size of tumor (cm)</b>  | 185 | 1.10±0.72  | 1.34±0.86  | <b>0.038</b> |
| <b>Multifocality</b>               |     |            |            | 0.375        |
| <b>Unifocal</b>                    | 135 | 63 (46.7%) | 72 (53.3%) |              |
| <b>Multifocal</b>                  | 50  | 27 (54.0%) | 23 (46.0%) |              |
| <b>Coexistent HT</b>               |     |            |            | 0.370        |
| <b>Yes</b>                         | 44  | 24 (54.5%) | 20 (45.5%) |              |
| <b>No</b>                          | 141 | 66 (46.8%) | 75 (53.2%) |              |
| <b>PTMC</b>                        |     |            |            | <b>0.030</b> |
| <b>Yes</b>                         | 100 | 56 (56.0%) | 44 (44.0%) |              |
| <b>No</b>                          | 85  | 34 (40.0%) | 51 (60.0%) |              |
| <b>ETE</b>                         |     |            |            | 0.378        |
| <b>Yes</b>                         | 17  | 10 (58.3%) | 7 (41.2%)  |              |
| <b>No</b>                          | 168 | 80 (47.6%) | 88 (52.4%) |              |
| <b>T Stage</b>                     |     |            |            | 0.714        |
| <b>T1-T2</b>                       | 166 | 80 (48.2%) | 86 (51.8%) |              |
| <b>T3-T4</b>                       | 19  | 10 (52.6%) | 9 (47.4%)  |              |
| <b>LNM</b>                         |     |            |            | <b>0.024</b> |
| <b>N0</b>                          | 85  | 49 (57.6%) | 36 (42.4%) |              |
| <b>N1</b>                          | 100 | 41 (41.0%) | 59 (59.0%) |              |
| <b>TNM Stage</b>                   |     |            |            | 0.685        |
| <b>I-II</b>                        | 152 | 75 (49.3%) | 77 (50.7%) |              |
| <b>III-IV</b>                      | 33  | 15 (45.5%) | 18 (54.5%) |              |
| <b><i>BRAF</i><sup>V600E</sup></b> |     |            |            | 0.625        |
| <b>Mutation</b>                    | 103 | 52 (50.5%) | 51 (49.5%) |              |
| <b>Wild-type</b>                   | 79  | 37 (46.8%) | 42 (53.2%) |              |

**Table S2. Clinicopathological correlations of LINC00271 expression in the FUSCC cohort.**

Notes: Italic and bold type indicates statistical significance. Abbreviations: PTC, papillary thyroid cancer; PTMC, papillary thyroid microcarcinoma; HT, Hashimoto's thyroiditis; ETE, extrathyroidal extension; LNM, lymph node metastasis; TNM, tumor–node–metastasis

| Variables                          | FUSCC cohort                |       |                 | TCGA cohort                 |       |                 |
|------------------------------------|-----------------------------|-------|-----------------|-----------------------------|-------|-----------------|
|                                    | <i>P</i> value <sup>a</sup> | OR    | 95.0% CI for OR | <i>P</i> value <sup>a</sup> | OR    | 95.0% CI for OR |
| Age <sup>b</sup>                   | 0.067                       | 1.034 | 0.998-1.072     | 0.535                       | 1.008 | 0.983-1.034     |
| Gender <sup>b</sup>                |                             |       |                 |                             |       |                 |
| Male                               |                             | 1     |                 |                             | 1     |                 |
| Female                             | <b>0.034</b>                | 0.422 | 0.190-0.935     | 0.884                       | 1.056 | 0.507-2.199     |
| Multifocality <sup>b</sup>         |                             |       |                 |                             |       |                 |
| Unifocal                           |                             | 1     |                 |                             | 1     |                 |
| Multifocal                         | 0.463                       | 0.767 | 0.378-1.558     | 0.087                       | 0.557 | 0.285-1.088     |
| Histological subtypes <sup>b</sup> |                             |       |                 |                             |       |                 |
| Classical PTC                      |                             | 1     |                 |                             | 1     |                 |
| Follicular PTC                     |                             | NA    |                 | 0.704                       | 0.824 | 0.304-2.234     |
| Tall-cell PTC                      |                             | NA    |                 | <b>0.011</b>                | 7.903 | 1.602-38.994    |
| Coexistent HT <sup>b</sup>         |                             |       |                 |                             |       |                 |
| No                                 |                             | 1     |                 |                             | 1     |                 |
| Yes                                | 0.700                       | 0.863 | 0.408-1.825     | 0.405                       | 0.674 | 0.266-1.708     |
| ETE <sup>b</sup>                   |                             |       |                 |                             |       |                 |
| No                                 |                             | 1     |                 |                             | 1     |                 |
| Yes                                | 0.205                       | 0.422 | 0.111-1.601     | 0.685                       | 1.352 | 0.314-5.819     |
| T stage <sup>b</sup>               |                             |       |                 |                             |       |                 |
| T1-T2                              |                             | 1     |                 |                             | 1     |                 |
| T3-T4                              | 0.385                       | 2.415 | 0.331-17.622    | 0.654                       | 0.710 | 0.159-3.178     |
| LN <sup>b</sup>                    |                             |       |                 |                             |       |                 |

|                                                |                  |                     |       |             |                     |       |              |
|------------------------------------------------|------------------|---------------------|-------|-------------|---------------------|-------|--------------|
|                                                | <b>N0</b>        |                     | 1     |             |                     | 1     |              |
| <b>M<sup>b</sup></b>                           | <b>N1</b>        | <i><b>0.013</b></i> | 2.646 | 1.225-5.714 | <i><b>0.034</b></i> | 2.158 | 1.060-4.394  |
|                                                | <b>M0</b>        |                     | 1     |             |                     | 1     |              |
| <b>TNM stage<sup>b</sup></b>                   | <b>M1</b>        |                     | NA    |             | 0.644               | 1.705 | 0.178-16.337 |
|                                                | <b>I-II</b>      |                     | 1     |             |                     | 1     |              |
|                                                | <b>III-IV</b>    | <i>0.349</i>        | 0.592 | 0.197-1.777 | <i>0.687</i>        | 1.225 | 0.458-3.278  |
| <b><i>BRAF</i><sup>V600E</sup><sup>b</sup></b> |                  |                     |       |             |                     |       |              |
|                                                | <b>Wild-type</b> |                     | 1     |             |                     | 1     |              |
|                                                | <b>Mutation</b>  | 0.400               | 0.761 | 0.402-1.439 | <i>0.077</i>        | 1.842 | 0.936-3.626  |

**Table S3. Multivariate analysis of factors that might affect LINC00271 expression in PTC in the TCGA and FUSCC cohorts.** Notes: a, Italic and bold type indicates statistical significance; b, adjusted by all factors in multivariate analysis. Abbreviations: PTC, papillary thyroid cancer; FUSCC, Fudan University Shanghai Cancer Center; TCGA, The Cancer Genomics Atlas; OR, odds ratio; CI, confidence interval; HT, Hashimoto's thyroiditis; ETE, extrathyroidal extension; LNM, lymph node metastasis; M, metastasis; NA, not available; TNM, tumor-node-metastasis



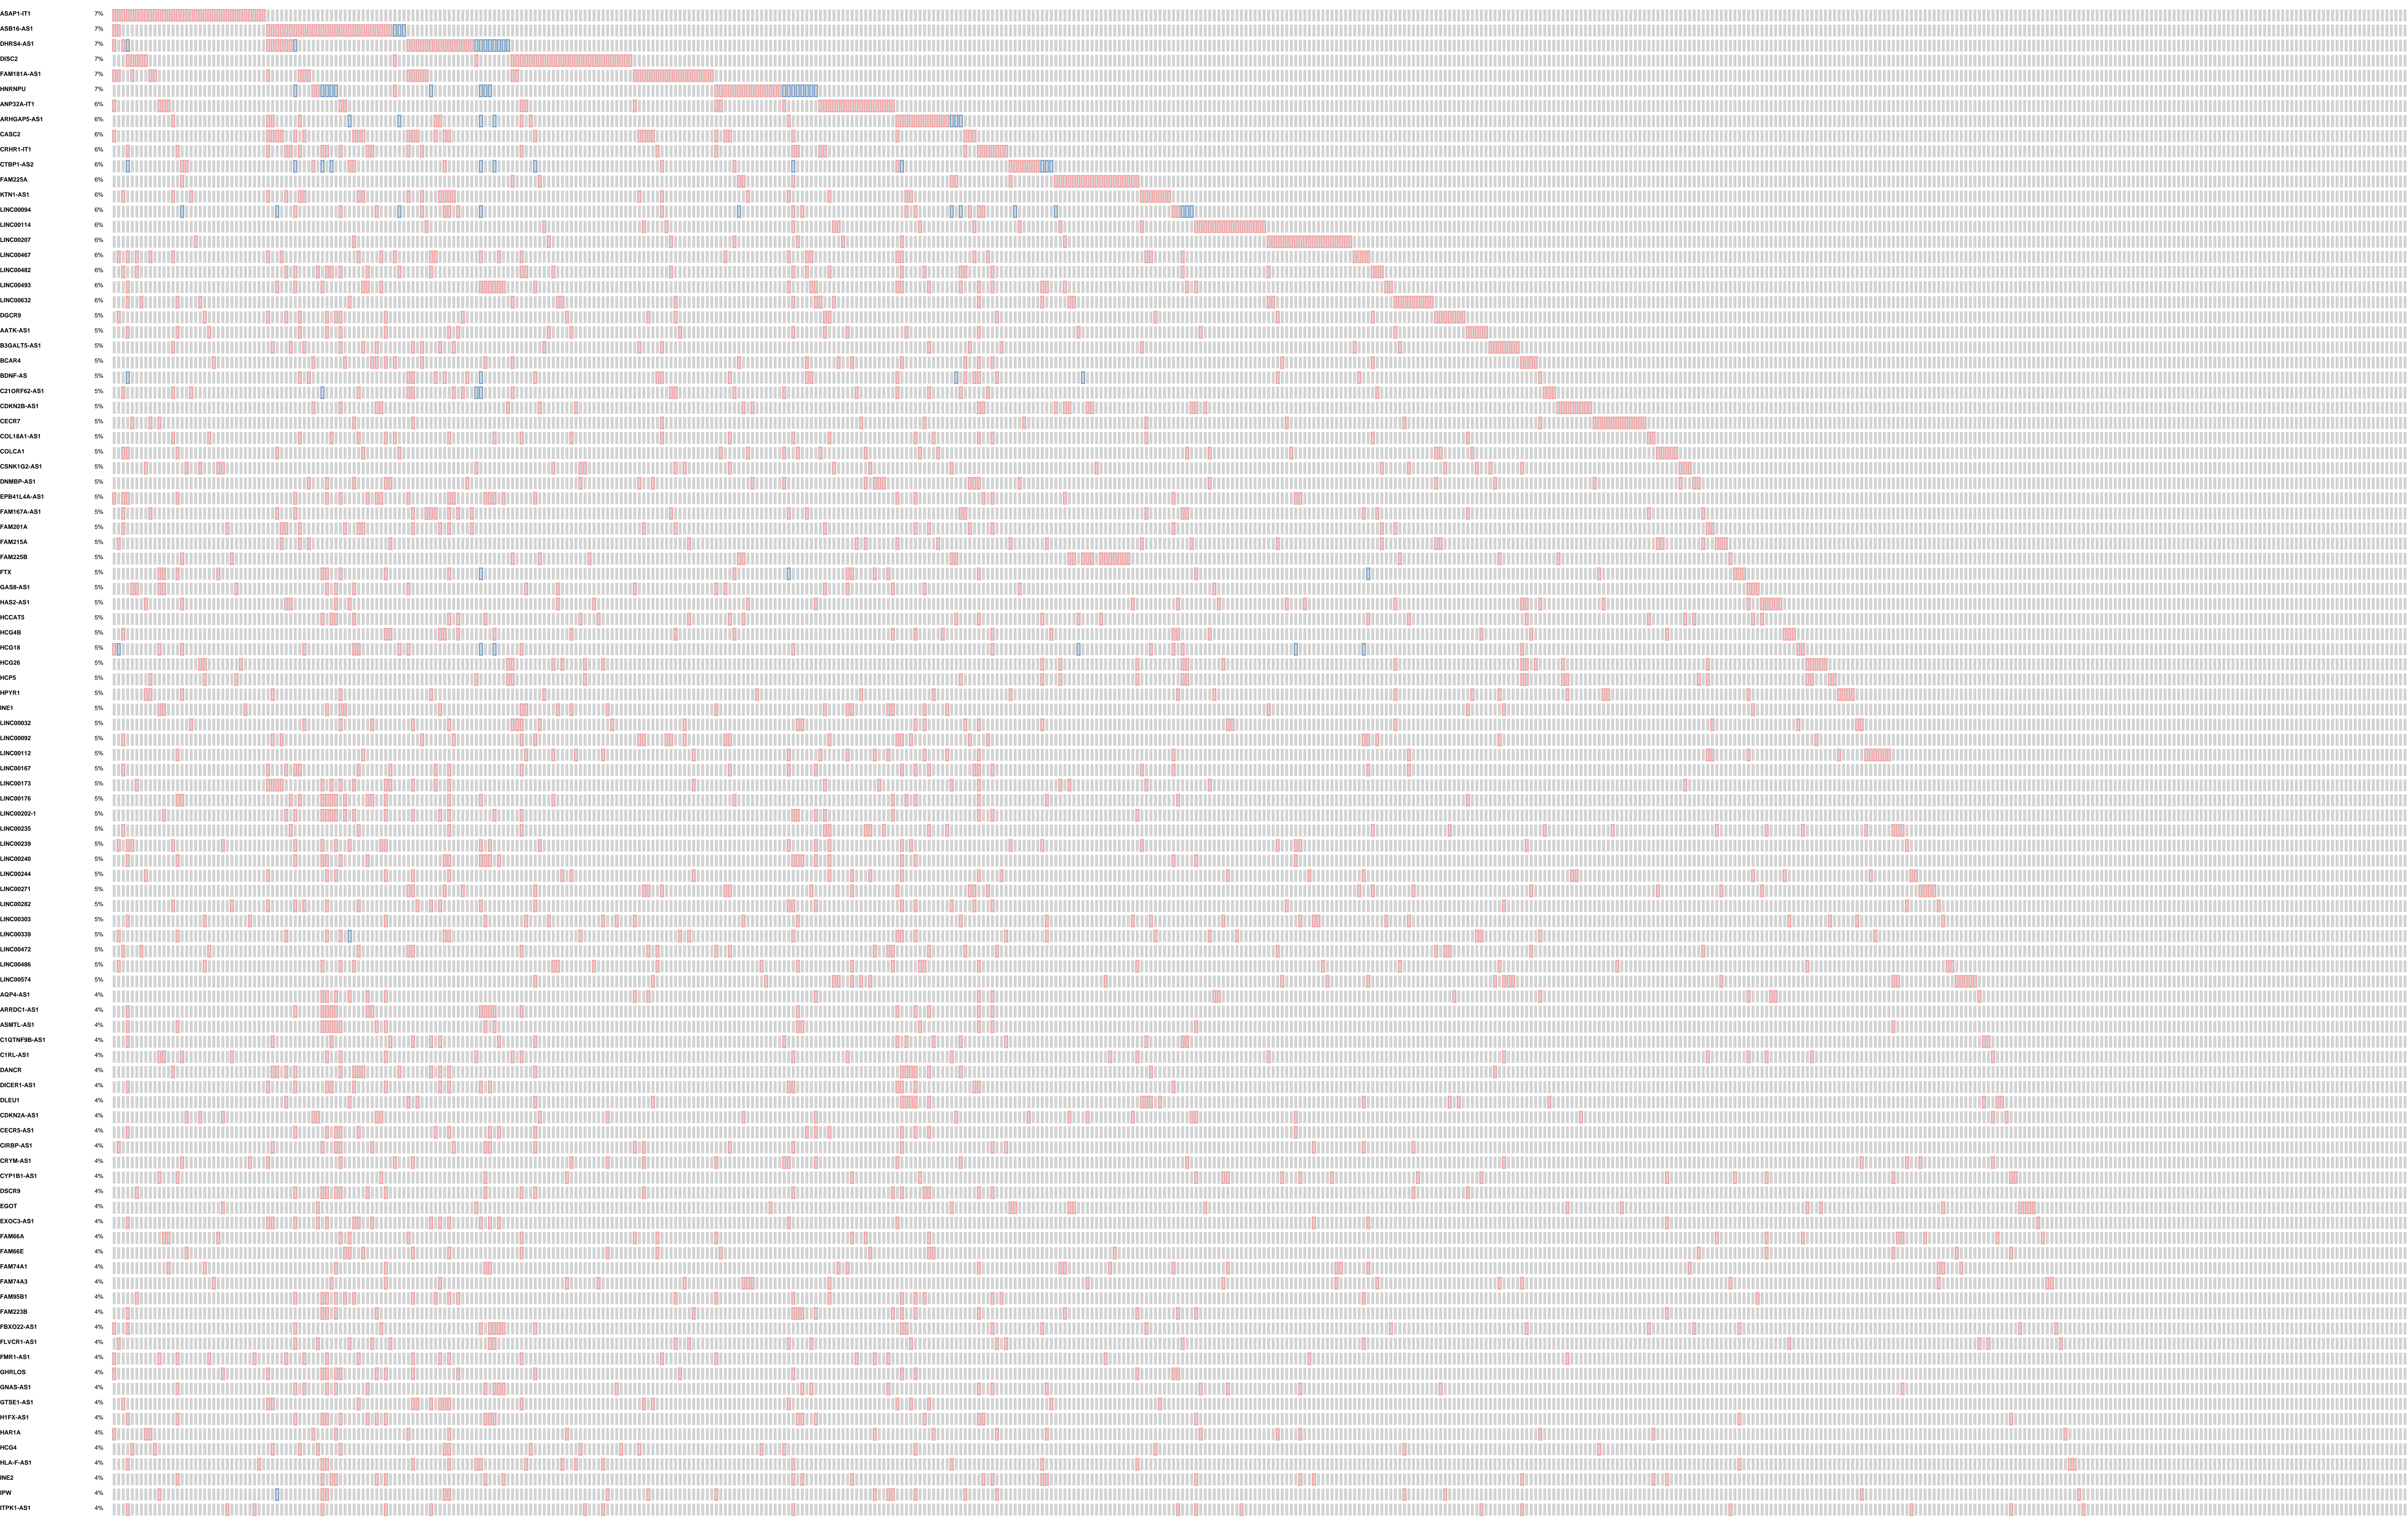

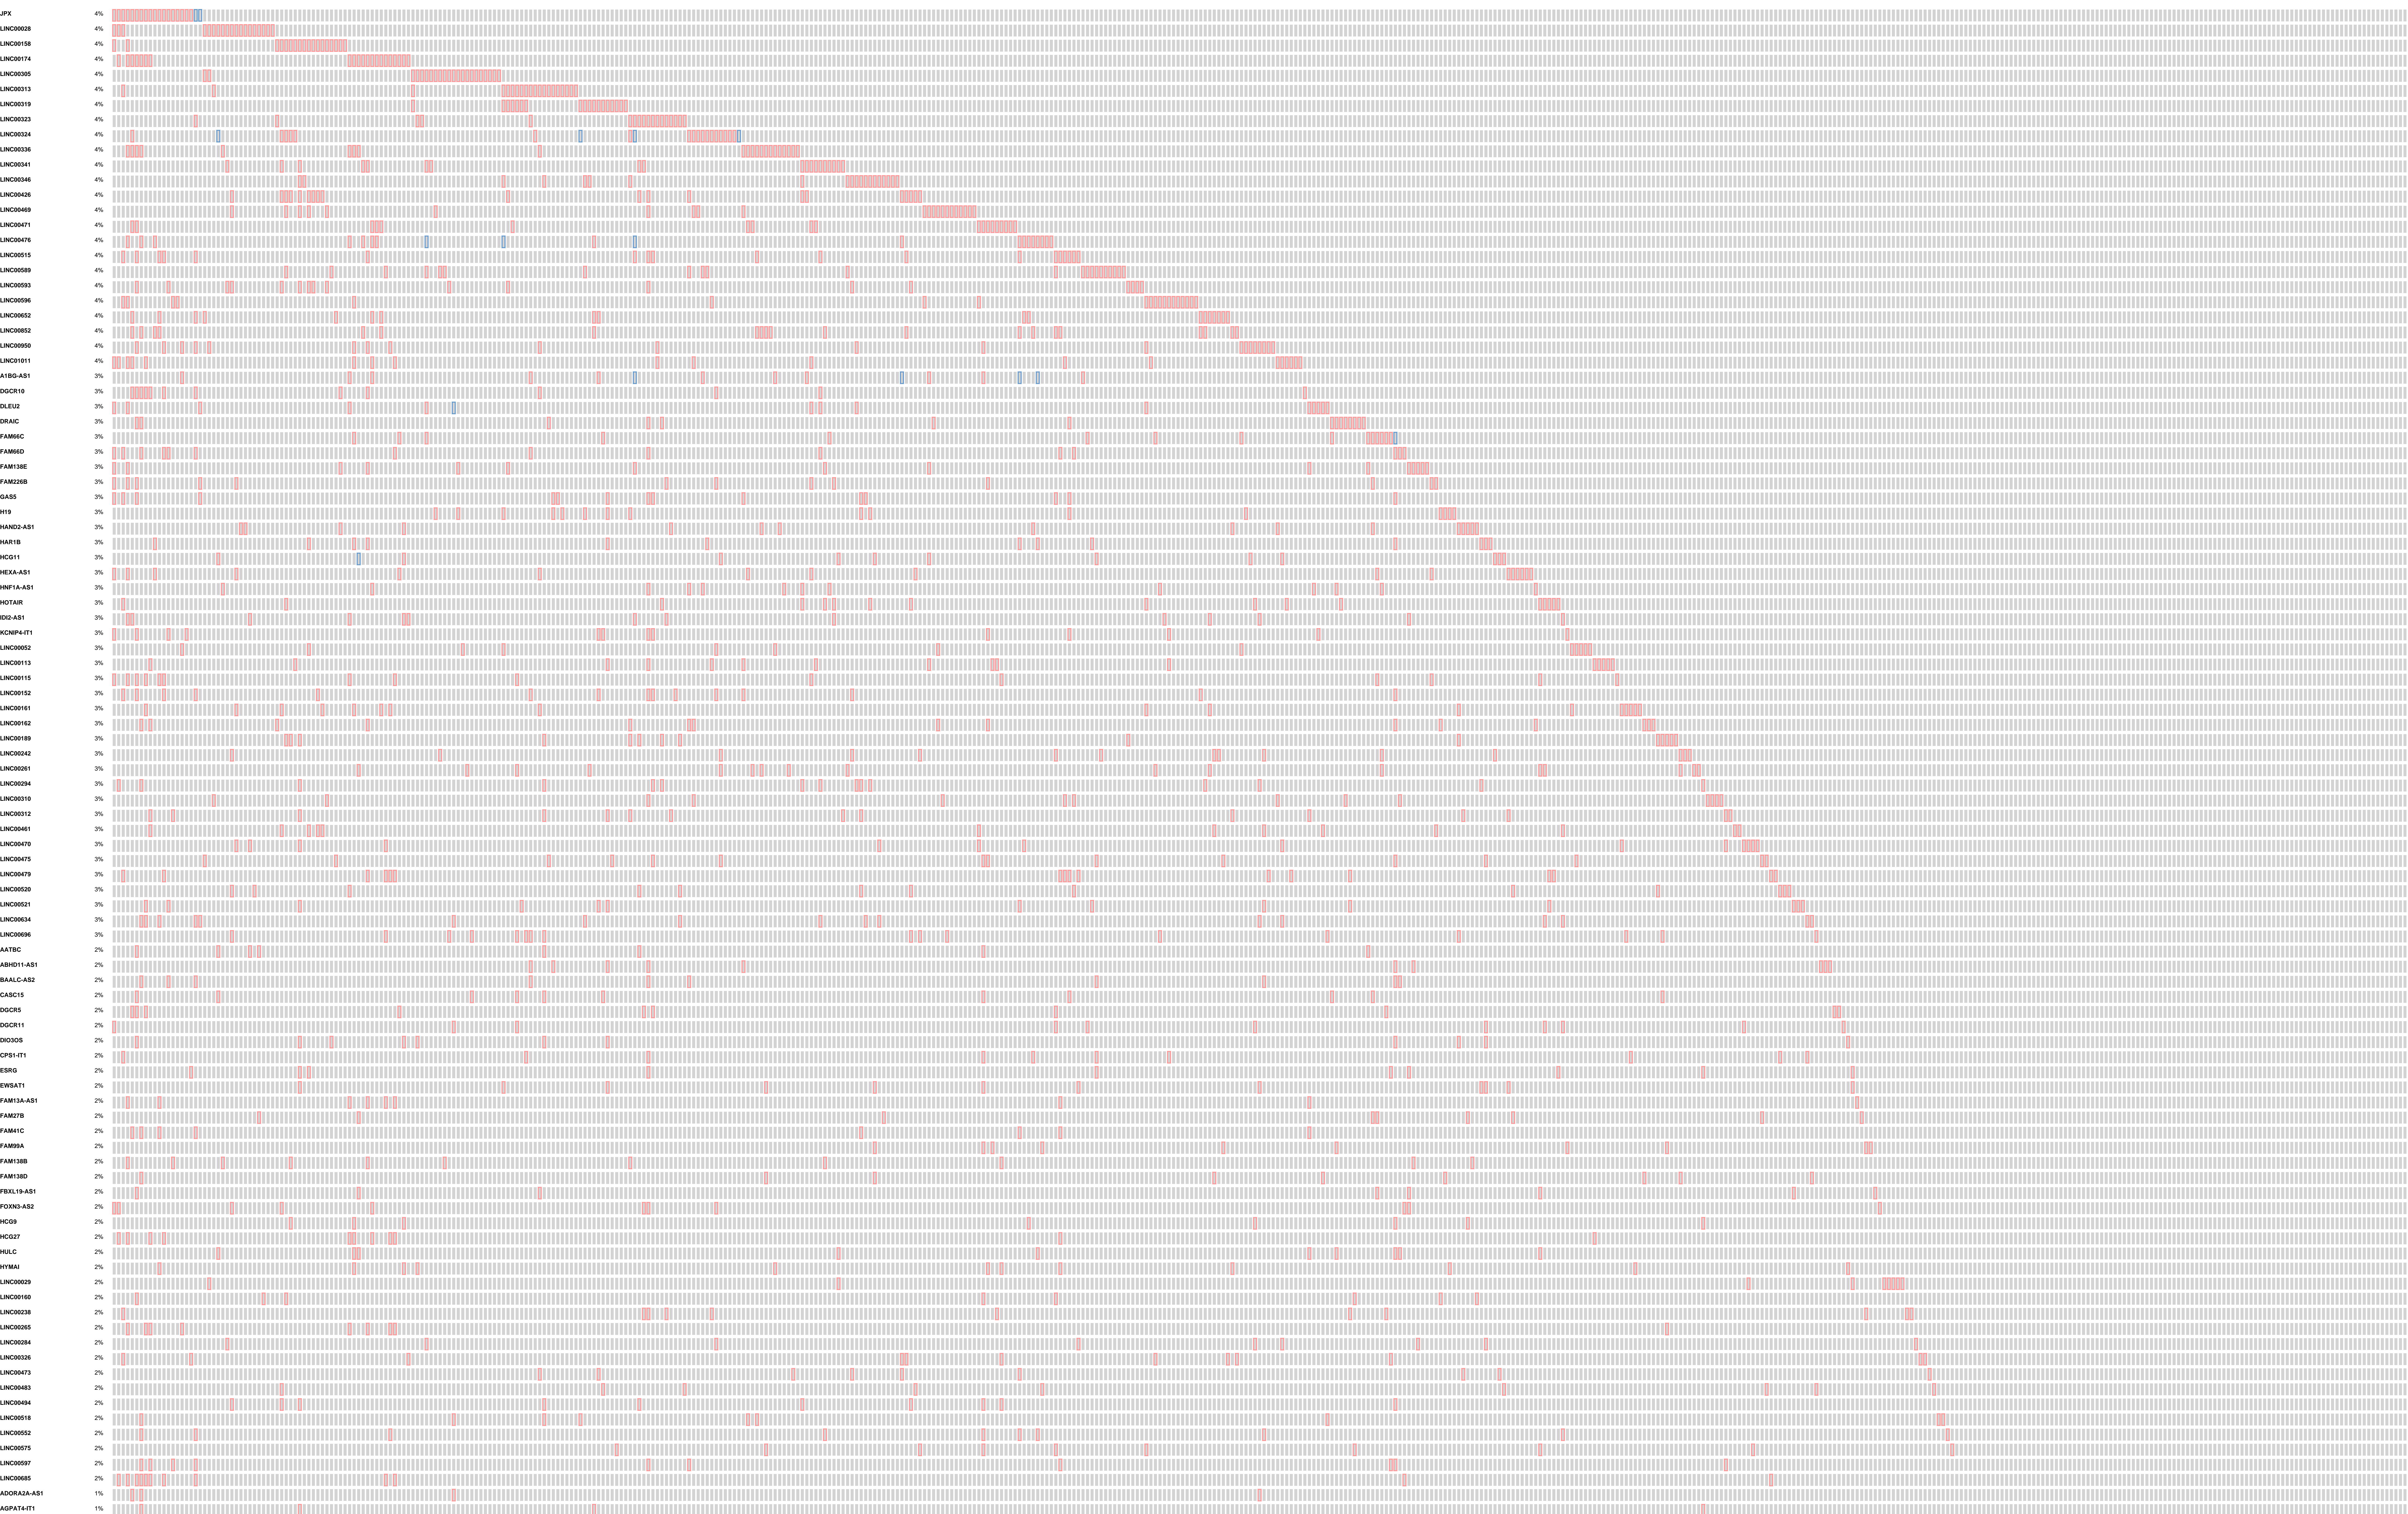

Genetic Alteration mRNA Upregulation mRNA Downregulation

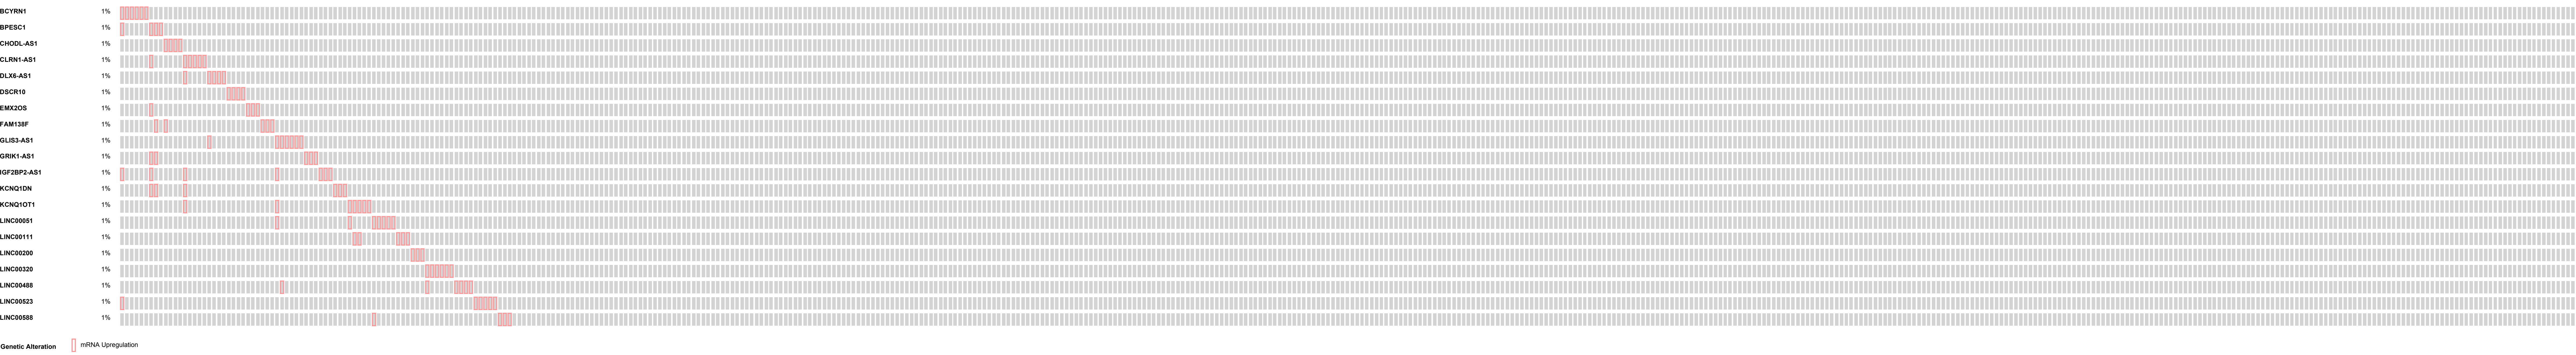

Figure S1. The expression alteration frequency of the 220 lncRNAs ranged from 1% to 7% in 486 PTC patients with RNA sequencing data

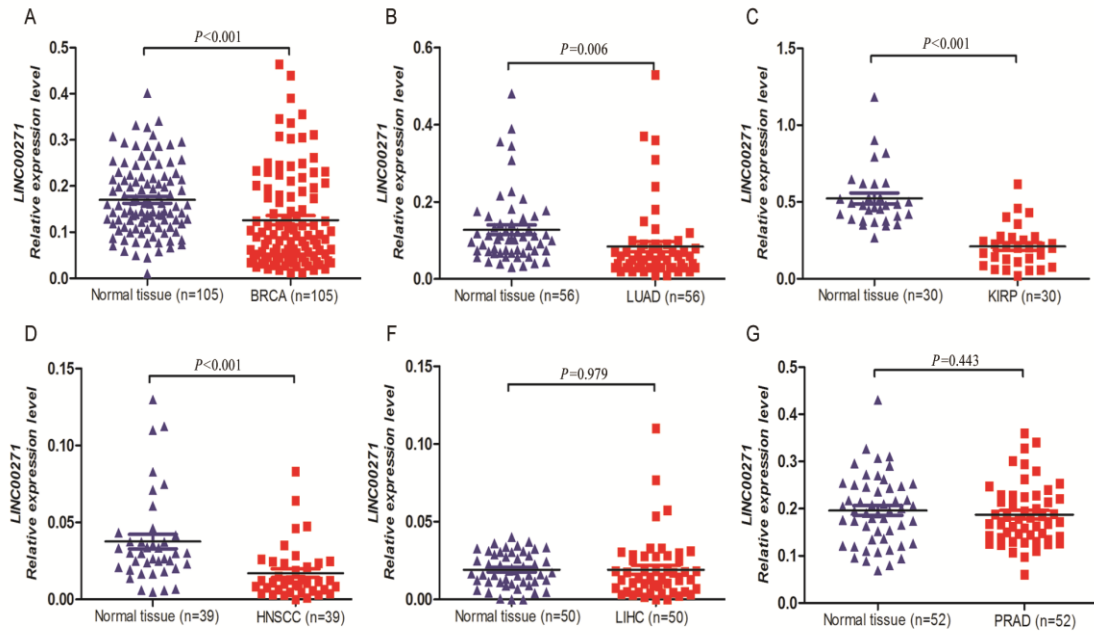

Figure S2. A comparison of LINC00271 expression between carcinomas and normal tissues in BRCA, LUAD, KIRP, HNSCC, LIHC and PRAD. A-D showed LINC00271 expression was significantly suppressed in carcinomas compared with normal tissues in BRCA, LUAD, KIRP and HNSCC. F and G indicated no significant difference in LINC00271 expression between carcinomas and normal tissues in LIHC and PRAD.

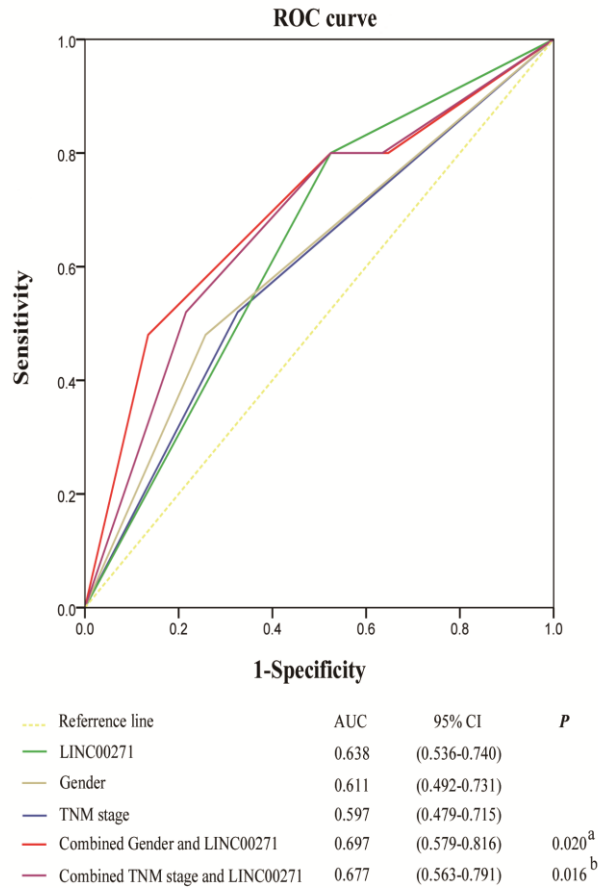

**Figure S3. ROC analysis for the predictive values of LINC00271, gender and TNM stage for PTC recurrence.** a, comparison between Gender and combined gender and LINC00271; b, comparison between TNM stage and combined TNM stage and LINC00271. After combining LINC00271, the AUC values of gender and TNM stage for predicting recurrence were significantly elevated from 0.611 to 0.697 ( $P=0.020$ ) and 0.597 to 0.677 ( $P=0.016$ ), respectively.
